# Epistasis regulates genetic control of cardiac hypertrophy

Qianru Wang\*<sup>1</sup>, Tiffany M. Tang\*<sup>2</sup>, Nathan Youlton<sup>1</sup>, Chad S. Weldy<sup>1</sup>, Ana M. Kenney<sup>2</sup>, Omer Ronen<sup>2</sup>, J. Weston Hughes<sup>1</sup>, Elizabeth T. Chin<sup>1</sup>, Shirley C. Sutton<sup>1</sup>, Abhineet Agarwal<sup>2</sup>, Xiao Li<sup>2</sup>, Merle Behr<sup>3</sup>, Karl Kumbier<sup>4</sup>, Christine S. Moravec<sup>5</sup>, W. H. Wilson Tang<sup>5,6</sup>, Kenneth B. Margulies<sup>7,8</sup>, Thomas P. Cappola<sup>7,8</sup>, Atul J. Butte<sup>9,10</sup>, Rima Arnaout<sup>9,10</sup>, James B. Brown<sup>2,10,11</sup>, James R. Priest<sup>1,10,12</sup>, Victoria N. Parikh<sup>1</sup>, Bin Yu<sup>†2,10,13,14</sup>, Euan A. Ashley<sup>†1,10</sup>

\* Equal contribution

† Equal senior authorship

## Affiliations

1. Division of Cardiovascular Medicine, Department of Medicine, Stanford University, Stanford, CA, USA
2. Department of Statistics, University of California, Berkeley, Berkeley, CA, USA
3. Faculty of Informatics and Data Science, University of Regensburg, Regensburg, Germany
4. Department of Pharmaceutical Chemistry, University of California, San Francisco, San Francisco, CA, USA
5. Department of Cardiovascular and Metabolic Sciences, Lerner Research Institute, Cleveland Clinic, Cleveland, OH, USA
6. Department of Cardiovascular Medicine, Heart Vascular and Thoracic Institute, Cleveland Clinic, Cleveland, OH, USA
7. Division of Cardiovascular Medicine, Perelman School of Medicine, University of Pennsylvania, Philadelphia, PA, USA
8. Hospital of The University of Pennsylvania, Philadelphia, PA, USA
9. Bakar Computational Health Sciences Institute, University of California, San Francisco, San Francisco, CA, USA
10. Chan Zuckerberg Biohub – San Francisco, San Francisco, CA, USA
11. Division of Environmental Genomics and Systems Biology, Lawrence Berkeley National Laboratory, Berkeley, CA, USA
12. Tenaya Therapeutics, San Francisco, CA, USA
13. Department of Electrical Engineering and Computer Science, University of California, Berkeley, Berkeley, CA, USA
14. Center for Computational Biology, University of California, Berkeley, Berkeley, CA, USA

## Correspondence

Dr. Euan Ashley

Roger and Joelle Professor of Genomics and Precision Health

Professor of Cardiovascular Medicine, Genetics and Data Science

Division of Cardiovascular Medicine, Department of Medicine

Stanford University

Falk Cardiovascular Research Building, 870 Quarry Road, Stanford, CA 94304

[euana@stanford.edu](mailto:euana@stanford.edu)

Dr. Bin Yu

Professor of Statistics

Department of Statistics and Electrical Engineering and Computer Sciences

University of California Berkeley

367 Evans Hall, University Dr, Berkeley, CA 94720

[binyu@berkeley.edu](mailto:binyu@berkeley.edu)

## 1 **Abstract**

2 The combinatorial effect of genetic variants is often assumed to be additive. Although genetic  
3 variation can clearly interact non-additively, methods to uncover epistatic relationships remain in  
4 their infancy. We develop low-signal signed iterative random forests to elucidate the complex genetic  
5 architecture of cardiac hypertrophy. We derive deep learning-based estimates of left ventricular  
6 mass from the cardiac MRI scans of 29,661 individuals enrolled in the UK Biobank. We report  
7 epistatic genetic variation including variants close to *CCDC141*, *IGF1R*, *TTN*, and *TNKS*. Several  
8 loci where variants were deemed insignificant in univariate genome-wide association analyses are  
9 identified. Functional genomic and integrative enrichment analyses reveal a complex gene  
10 regulatory network in which genes mapped from these loci share biological processes and  
11 myogenic regulatory factors. Through a network analysis of transcriptomic data from 313 explanted  
12 human hearts, we found strong gene co-expression correlations between these statistical epistasis  
13 contributors in healthy hearts and a significant connectivity decrease in failing hearts. We assess  
14 causality of epistatic effects via RNA silencing of gene-gene interactions in human induced  
15 pluripotent stem cell-derived cardiomyocytes. Finally, single-cell morphology analysis using a novel  
16 high-throughput microfluidic system shows that cardiomyocyte hypertrophy is non-additively  
17 modifiable by specific pairwise interactions between *CCDC141* and both *TTN* and *IGF1R*. Our  
18 results expand the scope of genetic regulation of cardiac structure to epistasis.

## 19 **Main**

20 Heart disease is closely tied to the structure of the heart<sup>1</sup>. Heart failure, a syndrome characterized by  
21 increased pressure within, or decreased output from, the heart is influenced by structural features  
22 including atrial and ventricular chamber size and wall thickness<sup>2-5</sup>. Left ventricular hypertrophy –  
23 increased thickness of the left ventricle (LV) – can be the result of mendelian genetic diseases like  
24 hypertrophic cardiomyopathy<sup>6</sup> but is also a complex phenotypic trait influenced by multiple factors,  
25 genetic and environmental. Progressive LV hypertrophy carries significant independent risk for incident  
26 heart failure, atrial arrhythmia, and sudden death<sup>7-10</sup>, highlighting the need to understand genetic  
27 determinants of cardiac phenotype.

28 Recent discoveries leveraging cardiac magnetic resonance imaging in the UK Biobank (UKBB) have  
29 revealed that cardiac structure is in part determined by complex genetics<sup>11-14</sup>. Common genetic  
30 variants, many located near genetic loci associated with dilated cardiomyopathy and heart failure, have  
31 been found to influence LV size and systolic function<sup>11</sup>. Further, specific genetic variants that influence  
32 LV trabeculation have been shown to impact systolic function and overall risk of cardiomyopathy<sup>13</sup>.  
33 However, these variants remain inadequate to explain the total heritable disease risk<sup>15</sup>. Indeed,  
34 common genetic variants rarely act independently and additively as modeled by most genome-wide  
35 association studies (GWAS)<sup>16</sup>. There is growing biological and clinical evidence<sup>17</sup> to support a disease  
36 risk model in which multiple genes interact non-additively with each other through epistasis<sup>18,19</sup>. While  
37 some computational studies estimated a minor average epistatic component compared to the additive  
38 component within the total genetic variance, these epistatic variance estimates exhibit a large trait-to-  
39 trait variation<sup>20</sup>. In addition, it's important to distinguish between the concepts of statistical epistasis,  
40 estimated through variance components and influenced by allele frequencies, and biological epistasis  
41 (e.g., gene actions), which is independent from allele frequencies<sup>21</sup>. Recent work has shown that  
42 common genetic variation influences susceptibility and expressivity of hypertrophic cardiomyopathy<sup>14</sup>.  
43 This raises the possibility that common epistatic interactions drive cardiac phenotype, holding

44 significant potential for uncovering disease mechanisms and developing potential therapeutic  
45 strategies.

46 Several computational and experimental challenges need to be resolved to allow robust identification of  
47 epistasis. First, the combinatorial nature of possibly high-order interactions makes an exhaustive  
48 search computationally intractable. To reduce the computational burden and ensure stable discoveries,  
49 we developed an approach based on signed iterative random forests<sup>22,23</sup> to uncover higher-order (not  
50 limited to pairwise) nonlinear interactions in a computationally-tractable manner. Second, many  
51 previously reported epistatic relationships were not replicated<sup>24,25</sup>. To achieve more trustworthy results,  
52 we adhered to a new framework for veridical data science<sup>26</sup>, centered around the principles of  
53 predictability, computability, and stability (PCS) and the need for transparent documentation of  
54 decisions made in data analysis pipelines. A third challenge is the generally small effect size of  
55 common genetic variants<sup>15,27</sup> which impedes both the data-driven discovery and functional validation of  
56 epistatic interactions. In human biobanks, recent advances in deep-learning-enabled phenotyping<sup>28</sup>  
57 using cardiac magnetic resonance images have led to more refined phenotypes at larger scales. At the  
58 cellular level, high-throughput microfluidic technologies<sup>29-31</sup> have been integrated with artificial  
59 intelligence-based image analysis of single-cell morphology<sup>32</sup> and human induced pluripotent stem cell-  
60 derived cardiomyocytes<sup>33</sup>, opening up new possibilities for rapid, label-free detection of the phenotypic  
61 consequences of genetic perturbation.

## 62 **Results**

63 In contrast to many studies<sup>18,20,25</sup> that have investigated the statistical significance or causality of  
64 epistasis solely from data, we tackle the aforementioned challenges and conceptual gap between  
65 statistical epistasis and biological epistasis<sup>21</sup> via a multi-stage approach. This approach begins with a  
66 data-driven prioritization of promising statistical epistasis followed by extensive functional  
67 interpretations and experimental validations to reliably assess the biological epistasis consistency.  
68 More specifically, our methodology includes four major stages: derivation of estimates of LV mass  
69 (green boxes, Fig. 1); computational prioritization of epistatic drivers (orange boxes, Fig.1); functional

70 interpretation of the hypothesized epistatic genetic loci (purple boxes, Fig.1); and experimental  
71 confirmation of epistasis through perturbation (blue boxes, Fig. 1).

## 72 **Deep learning of UK Biobank cardiac imaging quantifies left ventricular hypertrophy**

73 We accessed all cardiac magnetic resonance images from the UKBB substudy (44,503 people at the  
74 time of this analysis)<sup>34</sup>. We focused on the largest ancestry subset of 29,661 unrelated individuals  
75 (summary characteristics in Supplementary Table 1) and analyzed the most recent image per  
76 individual. We leveraged a recent deep learning model<sup>28</sup> to quantify LV hypertrophy from these 29,661  
77 multislice cine magnetic resonance images (Fig. 2a). A fully convolutional network had been previously  
78 trained for image segmentation and was evaluated on manual pixelwise-annotations of images from  
79 4,875 UKBB participants<sup>28</sup>. This fully convolutional network learns features across five different  
80 resolutions through sequential convolutional layers interspersed with non-linearities, and has displayed  
81 accurate performance compared to cardiac segmentation by human experts<sup>28</sup>. Using this segmentation  
82 model, we extracted areas of the LV chamber wall in each slice of the short axis image at the end of  
83 diastole. Areas extracted from each image slice in the same image stack were then integrated to  
84 calculate the heart muscle volume, which we converted to the LV mass using a standard density of  
85 1.05 g/mL<sup>35</sup>. This was normalized by body surface area, estimated using the Du Bois formula<sup>36</sup>, to  
86 obtain the LV mass index (LVMI, Extended Data Fig. 1). Details regarding this analysis can be found in  
87 Methods.

## 88 **Low-signal signed iterative random forests prioritize epistatic genetic loci**

89 We developed low-signal signed iterative random forests (lo-siRF, Fig. 2a-2e) to prioritize statistical  
90 epistatic interactions from the extracted LV mass and single-nucleotide variants (SNVs) from UKBB.  
91 Given the inherent low signal-to-noise ratio and aforementioned challenges, lo-siRF aims to  
92 recommend reliable candidate interactions for experimental validation rather than directly assessing  
93 claims of statistical significance from data. This prioritization pipeline is guided by the PCS framework<sup>26</sup>  
94 and builds upon signed iterative random forests<sup>22,23</sup>, a computationally-tractable algorithm to extract

95 predictive and stable nonlinear higher-order interactions that frequently co-occur along decision paths  
96 in a random forest. More specifically, lo-siRF proceeds through four steps:

- 97 1. *Dimension reduction* (Fig. 2b): we combined the results of two initial genome-wide association  
98 studies, implemented via PLINK<sup>37</sup> and BOLT-LMM<sup>38</sup> (Extended Data Fig. 2, Extended Data 1) to  
99 reduce the interaction search space from 15 million imputed variants down to 1405 variants  
100 (Extended Data 2). Details can be found in the Methods section *Lo-siRF step 1: Dimension*  
101 *reduction of variants via genome-wide association studies*.
- 102 2. *Binarization* (Fig. 2c): we partitioned the LV mass measurements into high, middle, and low  
103 categories using three different partitioning schemes (Supplementary Table 2). The partitioning  
104 enabled us to transform the original low-signal regression problem for a continuous trait into a  
105 relatively easier binary classification task for predicting individuals with high versus low LV mass  
106 measurements (omitting the middle category). This transformation is necessary to obtain a  
107 sufficient prediction signal, ensuring that the model indeed captures pertinent information about  
108 reality (Supplementary Table 3). Further justification and details on the partitioning can be found  
109 in the Methods section *Lo-siRF step 2: Binarization of the left ventricular mass phenotype*.
- 110 3. *Prediction* (Fig. 2d): we trained a signed iterative random forest using the 1405 GWAS-filtered  
111 SNVs to predict the binarized LV mass measurements. The learnt model yields on average the  
112 highest (balanced) classification accuracy (55%), area under the receiver operator characteristic  
113 (0.58), and area under the precision-recall curve (0.57) compared to other common machine  
114 learning prediction algorithms (Supplementary Table 4). Details about the model and prediction  
115 check can be found in the Methods section *Lo-siRF step 3: Prediction*.
- 116 4. *Prioritization* (Fig. 2e): we developed a stability-driven feature importance score (Extended Data  
117 Fig. 3), which leveraged the fitted signed iterative random forest and a permutation test, to  
118 aggregate SNVs into genetic loci and prioritize interactions between genetic loci. This  
119 importance score provides the necessary new interpretable machine learning ingredient to  
120 complete the lo-siRF discovery pipeline. Details can be found in the Methods section *Lo-siRF*  
121 *step 4: Prioritization*.

122 Additional discussion of the philosophy and modeling decisions driving lo-siRF can be found in  
123 Supplementary Note 1, an interactive HTML webpage hosted at [https://yu-group.github.io/epistasis-](https://yu-group.github.io/epistasis-cardiac-hypertrophy/)  
124 [cardiac-hypertrophy/](https://yu-group.github.io/epistasis-cardiac-hypertrophy/). The webpage also provides a comparison of lo-siRF to alternative epistasis  
125 detection methods, including an exhaustive regression-based pairwise interaction search<sup>39,40</sup> and  
126 MAPIT<sup>41</sup>, demonstrating the challenges and limitations of existing methods for analyzing low-signal,  
127 complex phenotypes.

128 Lo-siRF identified six genetic risk loci that exhibited stable and reliable associations with LV mass (Fig.  
129 2f). Because these loci are either located within a gene body or in between two genes (Fig. 3a), for  
130 convenience we denote these loci by their nearest genes. Notably, out of the six loci, three (*TTN*,  
131 *CCDC141*, and *IGF1R*) were prioritized by lo-siRF as epistatic loci. These loci not only interact with  
132 other loci, but also marginally affect LV mass. The other three lo-siRF-prioritized loci are  
133 *LOC157273;TNKS*, *MIR588;RSPO3*, and *LSP1*. The *LOC157273;TNKS* locus is located within the  
134 intergenic region between genes *LOC157273* and *TNKS* (semicolon indicates intergenic region). This  
135 locus was prioritized by lo-siRF to be hypostatic (i.e., effects are deemed stable by lo-siRF only when  
136 interacting with the *CCDC141* locus). Interestingly, all three identified epistatic interactions involved the  
137 *CCDC141* locus (Fig. 3a, green links in circle 1). Furthermore, while the *MIR588;RSPO3* and *LSP1* loci  
138 lacked evidence for epistasis by lo-siRF, they were each identified to be marginally associated with LV  
139 mass. The specific prioritization order of these loci can be found in Supplementary Table 5, and details  
140 regarding the direction or sign of the interactions can be found in Supplementary Note 1. In total, lo-  
141 siRF identified 283 SNVs located within the six loci (Extended Data 3, Extended Data Fig. 4). Ninety  
142 percent of the 283 SNVs have previously been shown to harbor multiple distinct cardiac function  
143 associations<sup>42</sup> in phenome-wide analyses (e.g., pulse rate, Extended Data 3), suggesting a strong  
144 likelihood that these lo-siRF-prioritized loci contribute to determining cardiac structure and function.  
145 Considering the correlations between LV hypertrophy and hypertension<sup>43</sup>, we evaluated whether these  
146 identified variants affect LV mass through regulating blood pressure. Specifically, we repeated the lo-  
147 siRF analysis using only the subset of UKBB individuals without hypertension (details in Methods). All

148 previously highlighted loci and interactions maintained priority in this non-hypertensive subset, except  
149 for the *MIR588;RSPO3* locus (Fig. 2f) which was not stably prioritized across all three binarization  
150 thresholding schemes. Additionally, none of the lo-siRF-prioritized variants showed a strong marginal  
151 association with hypertension, failing to meet the genome-wide ( $p < 5E-8$ ) and even the suggestive ( $p <$   
152  $1E-5$ ) significance level. However, the *MIR588;RSPO3* locus with lead SNV rs2022479 gave the  
153 smallest  $p$ -value of  $5E-5$ , which may suggest a possible pleiotropic effect of *MIR588;RSPO3* on both LV  
154 hypertrophy and blood pressure. In brief, while we cannot completely rule out pleiotropy, the highly  
155 stable prioritization of all three epistatic interactions in both analyses with and without hypertensive  
156 individuals suggest that the identified epistases on LV mass is not solely driven by blood pressure  
157 (additional discussion in Supplementary Note 1).

#### 158 **Loci associated with left ventricular mass exhibit regulatory enrichment**

159 We performed functional mapping and annotation (FUMA)<sup>44</sup> for the 283 lo-siRF-prioritized SNVs (Fig. 1,  
160 purple and Fig. 3). For linkage disequilibrium (LD), we used a default threshold of  $r^2 = 0.6$  and chose  
161 the UKBB release 2b reference panel created for British and European subjects to match the  
162 population group used for lo-siRF prioritization. FUMA identified 572 additional candidate SNVs  
163 (Extended Data 4) in strong LD ( $r^2 > 0.6$ ) with any of the 283 lo-siRF-prioritized SNVs, including 492  
164 SNVs from the input GWAS associations (points in Fig. 3a, circle 8) and 80 non-GWAS-tagged SNVs  
165 extracted from the selected reference panel (heatmap tracks in Fig. 3a, circle 8). We then assigned  
166 these 572 FUMA-extracted candidate SNVs to a lo-siRF-prioritized locus (Fig. 2f) based on the  
167 corresponding lo-siRF-prioritized SNV (out of the 283 SNVs), which has the maximum  $r^2$  value with the  
168 candidate SNV.

169 The two loci contributing to the top-ranked epistatic interaction by lo-siRF, the *CCDC141* and *IGF1R*  
170 loci (Fig. 2f), both showed a significant enrichment of intronic variants relative to the background  
171 reference panel (Fig. 3b, Extended Data 5). Over 88% of the SNVs in or in LD with these two loci were  
172 mapped to actively transcribed chromatin states (TxWk) or enhancer states (Enh) in left ventricles  
173 based on the ChromHMM Core 15-state model<sup>45</sup> (Fig. 3a, circle 7). More than 47% and 76% of the



174 identified SNVs in or in LD with the *CCDC141* and *IGF1R* loci, respectively, showed the highest  
175 RegulomeDB<sup>44,46</sup> categorical score (ranked within category 1 from the 7 main categories). The  
176 Combined Annotation-Dependent Depletion (CADD) score<sup>47</sup> was used to judge the deleteriousness of  
177 prioritized variants (Extended Data 4). As expected, GTEx<sup>48</sup> data revealed that 82% of SNVs in or in LD  
178 with the *IGF1R* locus are expression quantitative trait loci (eQTLs) for the gene *IGF1R*. In contrast, of  
179 the SNVs in or in LD with the *CCDC141* locus, only 14% are eQTLs for gene *CCDC141* and 22% are  
180 splicing quantitative trait loci (sQTLs) for gene *FKBP7*. Furthermore, Hi-C data indicated that all SNVs  
181 identified in or in LD with the *IGF1R* locus are in 3D chromatin interaction with gene *SYNM* while more  
182 than 54% SNVs identified in or in LD with the *CCDC141* locus are in 3D chromatin interaction with gene  
183 *TTN*. These known 3D chromatin interactions could suggest a possibility of higher-order interactions  
184 between more than two genes.

185 The *CCDC141* and *TTN* loci exhibit genomic proximity (Fig. 3a). Their interaction, however, does not  
186 appear to stem from this proximity. Indeed, the *CCDC141* and *TTN* genes have been individually  
187 associated with LV mass<sup>49,50</sup>. Due to this proximity, previous studies<sup>51,52</sup> have assumed *CCDC141* as a  
188 secondary gene that affects LV mass through the *TTN* gene expression. However, we found low LD ( $r^2$   
189  $< 0.6$ ) between any two of the 283 lo-siRF-prioritized SNVs, suggesting that the identified *CCDC141*-  
190 *TTN* interaction is unlikely driven by non-random LD associations between SNVs in these two loci. In  
191 addition, we compared all the epistasis-contributing SNVs that were aggregated to the *TTN* locus,  
192 including both lo-siRF-prioritized SNVs and their LD-linked variants, with the complementary set of  
193 *TTN*-annotated SNVs in lo-siRF. We found that the *TTN* locus showed a significant depletion of SNVs  
194 located close to ( $<10$  kb) the gene *CCDC141* ( $p = 2.38E-9$ , two-sided Fisher exact test). Similarly, the  
195 *CCDC141* locus showed a substantially decreased enrichment of SNVs that are close to gene *TTN* ( $p =$   
196  $0.02$ , two-sided Fisher exact test). These results suggest that although the *CCDC141* and *TTN* loci are  
197 located close to each other in the genome, the prioritized epistatic SNVs are located farther apart  
198 relative to randomly selected SNVs from the two loci.

199 In contrast to the *CCDC141* and *IGF1R* loci, the *TTN* locus showed a significant enrichment of exonic  
200 variants and intronic variants that are transcribed into non-coding RNA (ncRNA\_intronic, Fig. 3b). Of  
201 those exonic variants, 62% are nonsynonymous. This differential enrichment of exonic variants for the  
202 *TTN* locus may suggest a potential epistatic contribution to the structural alterations in the titin protein.  
203 Over 90% of SNVs in or in LD with the *TTN* locus were mapped to actively transcribed states (Tx,  
204 TxWk) in left ventricles (Fig. 3a, circle 7). Interestingly, these SNVs were associated with a quiescent  
205 chromatin state (Quies) in the right atrium, indicating that the epistatic effects of the *TTN* locus may be  
206 specific to ventricular tissues. Nearly half of SNVs in or in LD with the *TTN* locus are eQTLs for the  
207 gene *FKBP7*. In addition, 83% of these SNVs are sQTLs for gene *FKBP7* or *TTN*, suggesting a  
208 regulatory effect of the *TTN* locus on the expression and splicing of gene *FKBP7*. Moreover, the *TTN*  
209 locus was suggested to impact genes *PDE11A*, *RBM45*, *PRKRA*, and *DFNB59* through 3D chromatin  
210 interactions.

211 The hypostatic locus *LOC157273;TNKS* showed a significant enrichment of variants within non-coding  
212 RNA regions of exons and introns (Fig. 3b). Over 95% of identified SNVs in or in LD with this locus  
213 were mapped to inactive chromatin states (ReprPCWk, Quies) in left ventricles (Fig. 3a, circle 7). This  
214 suggests that in the absence of an epistatic partner, the *LOC157273;TNKS* locus is epigenetically  
215 quiescent or repressed by polycomb group proteins. In addition, of all the SNVs in or in LD with this  
216 locus, 66% are eQTLs for *MFHAS1* or *CLDN23* and 22% are in 3D chromatin interaction with gene  
217 *TNKS*.

218 Functional annotations for the other two lo-siRF-prioritized loci that were marginally associated with LV  
219 mass can be found in Extended Data 4 and 5.

## 220 **Epistatic loci functionally map to twenty-one protein-coding genes**

221 Three strategies, positional, eQTL, and chromatin interaction, mapped the six LV hypertrophy risk loci  
222 to 21 protein-coding genes (Fig. 4a). Genes prioritized by eQTL and chromatin interaction mapping are  
223 not necessarily located in the corresponding risk locus, but they are linked to SNVs within or in LD with  
224 the locus (Fig. 3a). Among the 21 genes, *CCDC141* and *IGF1R* were prioritized by all the three

225 mapping strategies (Fig. 4a), suggesting that these two genes are very likely involved in determining LV  
226 mass. Interestingly, none of the SNVs mapped to *IGF1R* were statistically significant in our GWAS  
227 studies using BOLT-LMM and PLINK (Extended Data Fig. 2 and Extended Data 1). Set-based  
228 association tests using SKAT-O<sup>53</sup> and MAGMA<sup>54</sup> also did not identify the *IGF1R* locus (details in  
229 Methods and Supplementary Note 1). This reveals the potential of lo-siRF to identify risk loci that may  
230 be overlooked by GWAS. Based on the expression data from GTEx V8, *TTN*, *TNNT3*, and *SYNM* are  
231 up-regulated while *CLDN23* and *MFHAS1* are down-regulated in both heart and muscle tissues (Fig.  
232 4b). In contrast, *CCDC141* is up-regulated specifically in heart tissues whereas *RSPO3* is down-  
233 regulated in heart but up-regulated in muscle tissues (Fig. 4b).

### 234 **Ten of twenty-one genes mapped from epistatic loci show strong correlations in network** 235 **analysis**

236 We performed gene ontology (GO) and pathway enrichment analysis on the 21 genes mapped from lo-  
237 siRF loci. We adopted previously established approaches<sup>55-57</sup> and integrated enrichment results across  
238 libraries from multiple sources to establish a GO and pathway co-association network (Fig. 4c). To  
239 evaluate the correlation strength between any two genes in the network, we calculated a co-association  
240 score for every possible gene-gene combination ( $n = 72,771$ ) from both genes prioritized and  
241 deprioritized by lo-siRF. Lo-siRF-prioritized genes are the 21 genes functionally mapped from the 283  
242 lo-siRF-prioritized SNVs and their LD-linked SNVs (Fig. 4a). Lo-siRF-deprioritized genes are those  
243 functionally mapped from the SNVs that failed to pass the lo-siRF prioritization threshold. Compared to  
244 random gene pairs in the network, 10 genes that were functionally mapped from the lo-siRF-prioritized  
245 epistatic and hypostatic loci showed significant co-associations with multiple GO/pathways (Fig. 4c,  
246 Extended Data 6). Consistent with our hypothesized epistasis (Fig. 2f), gene *CCDC141* showed a  
247 significant co-association to *SYNM* (functionally linked to the *IGF1R* locus) and *PDE11A* and *PLEKHA3*  
248 (both functionally linked to the *TTN* locus) through the GO term of hyperactivity (excessive movement),  
249 which has been linked to increased risk of cardiac disease<sup>58</sup>. Beyond that, *TTN*, *IGF1R*, and *SYNM* are  
250 co-associated with kinase activity and cardiac structure related GO terms, indicating that these genes  
251 may jointly affect cardiac structure by regulating the process of kinase activity.

252 **Genes mapped from epistatic loci are co-associated with myogenic regulatory factors**

253 We next performed an integrative enrichment analysis to assess transcriptional regulation of genes  
254 prioritized and deprioritized by lo-siRF. Due to assay-specific limitations and biases, we integrated the  
255 enrichment results across nine distinct gene set libraries<sup>55,56</sup> (Fig. 4d, Extended Data 7). We found that  
256 the lo-siRF-prioritized epistatic genes shared important myogenic regulatory factors, such as MYOD1,  
257 MYF6, and MYOG (Fig. 4d, top). These myogenic regulatory factors coordinate to regulate muscle  
258 development and differentiation. In contrast, Transcription factors enriched from lo-siRF-deprioritized  
259 genes display a less coordinated regulatory pattern (Fig. 4d, bottom). These analyses enriched  
260 transcription factors based on their associations to given sets of individual genes rather than co-  
261 association to gene pairs<sup>55,56</sup>. To further evaluate the correlation strength between any two genes that  
262 share transcription factors, we calculated a transcription factor co-association score for all the 72,771  
263 possible gene-gene combinations (see Methods). Compared with random gene pairs, 16 gene-gene  
264 combinations from the lo-siRF-prioritized genes displayed a significant co-association (empirical  $p <$   
265 0.05, Fig. 4e). These co-associations were found in gene-gene combinations from both intra- and inter-  
266 lo-siRF-prioritized loci (Fig. 4e). In particular, pairwise combinations among *TTN*, *TNNT3*, *CCDC141*,  
267 and *SYNM* share a common splicing regulator, RBM20 (Extended Data Fig. 5). RBM20 has been  
268 reported to regulate the alternative splicing of genes important for cardiac sarcomere organization<sup>59</sup>.  
269 This suggests that the splicing patterns of these four genes are likely to be co-regulated by RBM20,  
270 which is consistent with the exhibited enrichment of sQTLs by the *CCDC141*, *TTN* and *LSP1* lo-siRF  
271 loci (Extended Data 4).

272 **Genes mapped from epistatic loci exhibit strong co-expression and connectivity change in**  
273 **human heart failure transcriptomics**

274 We proceeded to the fourth stage for experimental confirmation (Fig. 1, blue) and evaluated how the  
275 identified epistases contribute to the progression of heart failure (Fig. 5). We employed a series of  
276 weighted gene co-expression networks derived from human cardiac transcriptomic data from 177 failing  
277 hearts isolated at the time of heart transplant and 136 non-failing hearts harvested from cardiac  
278 transplant donors whose organs were not able to be placed<sup>60</sup> (Fig. 5a). We compared the molecular

279 connectivity of genes identified as statistical epistatic interactors. We defined connectivity as the edge  
280 weights between two genes normalized to the distribution of all network edge weights, and compared  
281 this to the connectivity of all other available gene-gene combinations in the network. This revealed  
282 strong co-expression correlations between *CCDC141* and genes functionally linked to the *IGF1R* locus  
283 (*SYNM* and *LYSMD4*) and *TTN* locus (*TTN* and *FKBP7*) in the healthy control network (Fig. 5b). In  
284 contrast, most of these gene pairs (except for *CCDC141-TTN*) no longer exhibit a strong connectivity in  
285 the heart failure network (Fig. 5c). All of these connectivities showed a significant decrease (indicated  
286 by the negative connectivity difference score and  $p < 0.05$  in Fig. 5d) in the differential network,  
287 suggesting a declined co-expression correlation between these gene pairs relative to random gene  
288 pairs during the progression of failing hearts. This difference is potentially related to the rewired gene  
289 modular assignments between the control and heart failure networks<sup>60</sup> (Fig. 5e and Extended Data Fig.  
290 6). For instance, *CCDC141*, *SYNM*, *TTN*, and *TNNT3* are co-associated with the electron transport  
291 chain/metabolism module in the control network. In the failing hearts, *SYNM* and *TTN* rewire to the  
292 muscle contraction/cardiac remodeling module, whereas *CCDC141* and *TNNT3* remain associated with  
293 the metabolism module (Fig. 5e). In addition, other genes functionally linked to *IGF1R* and *TTN* lo-siRF  
294 loci are co-associated with the membrane transport or unfolded protein response module in healthy  
295 hearts and rewire to the muscle contraction/cardiac remodeling or cell surface/immune/metabolism  
296 module in failing hearts.

### 297 **Perturbation confirms epistatic relationships in cardiomyocyte hypertrophy**

298 We interrogated epistatic associations in a genetic model of cardiac hypertrophy (Fig. 1, blue): induced  
299 pluripotent stem cell cardiomyocytes derived from patients with and without hypertrophic  
300 cardiomyopathy caused by the cardiac myosin heavy chain (*MYH7*) p.R403Q variant<sup>33</sup> (Fig. 6a).  
301 Cardiac myosin heavy chain 7 is a key component of the cardiac sarcomere, and the most common  
302 cause of hypertrophic cardiomyopathy<sup>33</sup>. The patient presented with typical symptoms, and  
303 echocardiography revealed severe LV hypertrophy and a small LV cavity<sup>33</sup>. At the cellular level,  
304 cardiomyocytes exhibit an elevated mean cell size and non-Gaussian size distribution with a long tail  
305 relative to the unaffected control (Fig. 6d).

306 To determine if *CCDC141* can act both independently and in epistatic interactions with other genes to  
307 attenuate the pathologic cellular hypertrophy caused by *MYH7-R403Q*, we silenced genes *CCDC141*,  
308 *IGF1R*, *TTN*, and gene pairs *CCDC141-IGF1R* and *CCDC141-TTN* using siRNAs in both diseased and  
309 healthy cardiomyocytes and compared them with cells transfected with scramble siRNAs (control) (Fig.  
310 6a and 6e). Phenotypic consequences of these perturbations on cellular morphology were then  
311 evaluated in high-throughput using a spiral inertial microfluidic device (Fig. 6b) in combination with  
312 automated single-cell image analysis (Fig. 6c). The microfluidic device adopted the Dean flow focusing  
313 principle<sup>31</sup> (details in Extended Data Fig. 7 and Methods) to mitigate the non-uniform cell focusing<sup>61</sup>,  
314 thereby enhancing the imaging resolution<sup>62</sup> affected by the large variations in cardiomyocyte diameter  
315 (Fig. 6d).

316 We first assessed the knockdown effects of the *CCDC141-IGF1R* interaction on cardiomyocyte size  
317 (Fig. 6f). Bootstrapped hypothesis tests were performed, for which the  $p$ -values are capped below by  $p$   
318  $< 1E-4$  (Extended Data 8). Silencing *IGF1R* alone reduces the median cell size by  $5.3\% \pm 0.4\%$  ( $p <$   
319  $1E-4$ ) in diseased cells compared to scrambled control and  $6.6\% \pm 0.5\%$  ( $p < 1E-4$ ) in healthy cells.  
320 Silencing *CCDC141* alone also decreases median cell size by  $3.2\% \pm 0.5\%$  ( $p < 1E-4$ ) in diseased  
321 cells, but had no impact on healthy cells. Digenic silencing of *CCDC141* and *IGF1R* reveals a  
322 synergistic effect on attenuating pathologic cell hypertrophy in diseased cells, resulting in an  $8.5\% \pm$   
323  $0.3\%$  ( $p < 1E-4$ ) decrease in the median cell size. This is consistent in healthy cells, where silencing  
324 *CCDC141* alone fails to affect cell size, but digenic silencing of *CCDC141* and *IGF1R* decreases the  
325 median cell size by  $9.3\% \pm 0.5\%$  ( $p < 1E-4$ ). Moreover, according to our estimated quantile regression  
326 analysis (details in Methods), this interaction effect appears to be non-additive for both healthy and  
327 diseased cells ( $\hat{\beta}_{12} < 0$ , Fig. 6g;  $p < 1E-4$  for non-additivity, Extended Data 8), consistent with an  
328 epistatic mechanism. These findings serve to confirm the strongest epistatic association identified by lo-  
329 siRF (Fig. 2f).

330 We found a comparable non-additive effect for the *CCDC141-TTN* interaction. Digenic silencing of  
331 *CCDC141-TTN* leads to a pronounced reduction in median cell size (by  $5.8\% \pm 0.6\%$  for healthy cells

332 and  $3.3\% \pm 0.4\%$  for diseased cells,  $p < 1E-4$ ) relative to monogenic silencing (Fig. 6f). This interaction  
333 appears to be non-additive for both healthy and diseased cells ( $p$  values in Extended Data 8) yet  
334 demonstrating opposite epistatic directions in these two cell states (Fig. 6g). Additionally, *CCDC141*  
335 and *TTN* show distinctive independent roles in repressing cardiomyocyte hypertrophy. In healthy cells,  
336 monogenic silencing of *TTN* leads to a larger cell size reduction compared to the case of silencing  
337 *CCDC141*. In contrast, diseased cells display a larger size reduction in response to monogenic  
338 silencing of *CCDC141*.

339 Furthermore, both *CCDC141-IGF1R* and *CCDC141-TTN* interactions show a stronger effect on  
340 rescuing larger cardiomyocytes over smaller ones in both cell lines (Extended Data Fig. 8 and 9). In  
341 contrast, monogenic silencing does not exhibit such a non-uniform effect on reshaping the cell size  
342 distribution, which reinforces the hypothesized non-additivity of these two epistatic interactions (details  
343 in Extended Data 8 and Supplementary Note 2).

344 Recent studies have shown that cellular morphological features, such as cell boundary and textural  
345 irregularities, are informative readouts of cytoskeletal structure, which is highly associated with disease  
346 state in hypertrophic cardiomyopathy<sup>32,63</sup>. We analyzed relative changes in cell shape and texture (Fig.  
347 6h) by measuring the counts of peak intensities normalized to the total number of pixels enclosed by  
348 the cell boundary (Fig. 6i). Cells with a high normalized peak number display a ruffled texture, which  
349 manifests in unevenly distributed 2D intensities (Fig. 6k). Our analysis shows that silencing both  
350 *CCDC141* and *IGF1R* (circles in Fig. 6h, left) yields a larger increase in intensity peak number than  
351 silencing *IGF1R* alone (triangles in Fig. 6h, left) for both cell lines, exhibiting a synergistic epistasis  
352 between *CCDC141* and *IGF1R* ( $p < 1E-4$  for non-additivity). We also analyzed cell roundness error, a  
353 measure of how far radii measured on the cell outline deviate from a perfect circle (Fig. 6i). This  
354 parameter increases with an increasing cell boundary waviness or elongation (Fig. 6j). We show that  
355 the silencing of *CCDC141* and *IGF1R* synergistically interact to increase roundness error of diseased  
356 cardiomyocytes ( $p < 1E-4$  for non-additivity, Fig. 6h, left). In addition, *CCDC141* and *TTN* display

357 antagonistic epistasis and synergistic epistasis in their impact on roundness error for healthy and  
358 diseased cells ( $p < 1E-4$  for non-additivity, Fig. 6h, right), respectively.

## 359 **Discussion**

360 While computational models<sup>18,19</sup> have supported epistatic contributions to human complex traits and  
361 disease risk, examples in the literature are rare, with even fewer experimentally confirmed. Here, we  
362 developed a veridical machine learning<sup>26</sup> approach to identify epistatic associations with cardiac  
363 hypertrophy derived from a deep learning model that estimates LV mass from cardiac imaging of  
364 almost thirty thousand individuals in the UK Biobank. We report novel epistatic effects on LV mass of  
365 common genetic variants associated with *CCDC141*, *TTN*, and *IGF1R*. We used established tools to  
366 functionally link risk loci to genes, and then confirmed gene level co-associations through network  
367 analyses, including via shared transcription factors and pathways enriched against multiple annotated  
368 gene set libraries and co-expression networks we built using transcriptomic data from over three  
369 hundred healthy and diseased human hearts. Finally, using a cellular disease model incorporating  
370 monogenic and digenic silencing of individual genes, we assessed phenotypic changes in  
371 cardiomyocyte size and morphology using a novel microfluidic system, confirming the non-additive  
372 nature of the interactions.

373 Our approach advances epistasis discovery in several key ways. First, unlike studies relying on linear-  
374 based models<sup>64-67</sup>, we leverage a more realistic, nonlinear tree-based model that mirrors the  
375 thresholding (or switch-like) behavior commonly observed in biomolecular interactions<sup>68</sup>. Second, in  
376 contrast to other tree-based approaches that evaluate interactions on a variant-by-variant basis<sup>69-73</sup>, our  
377 novel stability-driven importance score consolidates individual variants into loci for the assessment of  
378 feature importance, allowing for more reliable extraction of epistatic interactions from weak association  
379 signals. This is particularly valuable for evaluating non-coding variants and resembles ideas from  
380 marginal association mapping with sets of SNVs<sup>53,54,74</sup>. Moreover, instead of exhaustively searching all  
381 possible interactions, signed iterative random forests internally employ a computationally-efficient  
382 algorithm, which automatically narrows the search space of interactions to only those that stably appear



383 in the forest and thus achieves a scalability much higher than existing tree-based approaches<sup>71,75</sup>. This  
384 allows lo-siRF to handle larger datasets without the need for LD pruning before the interaction search,  
385 which may inadvertently eliminate important epistatic variants, given that epistasis between loci in  
386 strong LD has been evidenced by a recent study<sup>76</sup>. Furthermore, our computational prioritization is  
387 rigorously validated through multiple functional network analyses and robust experimental confirmation.

388 Our results add to a small literature on epistasis in cardiovascular disease. Two recent studies have  
389 found epistasis influencing the risk of coronary artery disease<sup>18,19</sup>. Li et al.<sup>19</sup> identified epistasis between  
390 *ANRIL* and *TMEM106B* in coronary artery tissues. Although their method predicted functionally  
391 interpretable interactions between risk loci of interest, they relied heavily on prior knowledge and careful  
392 selection of the causal gene pairs,<sup>19</sup> making the approach challenging to scale. Zeng et al.<sup>18</sup> used  
393 population-scale data and performed epistasis scans from regions around 56 known risk loci. This  
394 study identified epistasis between variants in *cis* at the *LPA* locus without experimental confirmation. In  
395 contrast, our approach allows discovery of not only *cis*-epistasis, but also long-range interactions  
396 between interchromosomal loci (e.g., *CCDC141* and *IGF1R*) and is supported by gene perturbation  
397 experiments. More importantly, both studies searched for interactions around known risk loci identified  
398 by genome-wide association, which can be far away from the possible epistatic or hypostatic loci that  
399 are statistically insignificant in linear univariate association studies. In addition, both studies relied on a  
400 logistic regression model, which imposes restrictive assumptions that can be avoided using a nonlinear  
401 machine learning approach as in lo-siRF.

402 Our study has limitations. Given our primary interest in biological epistasis rather than statistical  
403 epistasis<sup>21</sup>, we tailored lo-siRF to conservatively<sup>21</sup> prioritize reliable targets for experimental validation as  
404 opposed to finding all possible epistatic drivers. Lo-siRF should ideally be used as a first-stage  
405 hypothesis generation tool within a broader scientific discovery pipeline. To assess significance of the  
406 lo-siRF-prioritized targets, we rely on and encourage follow-up investigations such as the high-  
407 throughput gene-silencing experiments conducted here. We focused this analysis on a single ancestry  
408 in order to enhance the likelihood of finding reliable interactions from weak association signals. These

409 findings cannot be automatically applied to others. It was not feasible to conduct a formal genetic  
410 replication study because the UK Biobank is the only large-scale population cohort with integrated  
411 cardiac magnetic resonance images and genetic data. However, to help reduce the possibility of  
412 overfitting and increase generalizability, lo-siRF employed numerous stability analyses (see  
413 Supplementary Note 1) in addition to a proper training-validation-test data split. Beyond these  
414 computational checks, we also present functional supporting evidence and experimental validation. Our  
415 computational prioritization via lo-siRF currently groups SNVs based on genomic proximity, without  
416 accounting for their functional interdependencies, but this could be addressed by integrating functional  
417 annotation into the lo-siRF pipeline. Lo-siRF also relies on a GWAS to reduce the number of SNVs to a  
418 computationally manageable size, but this could be improved with more sophisticated epistasis  
419 detection algorithms such as MAPIT. Lastly, lo-siRF is not as scalable as linear-based methods, though  
420 it is more scalable than alternative tree-based methods for epistasis detection. It also should be noted  
421 that although this study did not identify stable higher-order (> order-2) interactions due to the weak  
422 association signal between SNVs and LV mass, the method exhibits the capability to detect such  
423 interactions for broader phenotypes and complex traits without incurring additional computational cost.

424 In summary, our work adds to the discovery toolkit for the genomic architecture of complex traits and  
425 expands the scope of genetic regulation of cardiac structure to epistasis.

## 426 **Online Methods**

### 427 **Study participants**

428 The use of human subjects (IRB - 4237) and human-derived induced pluripotent stem cells (SCRO -  
429 568) in this study has been approved by the Stanford Research Compliance Office. The UK Biobank  
430 received ethical approval from the North West - Haydock Research Ethics Committee (21/NW/0157).

431 The UK Biobank (UKBB) is a biomedical database with detailed phenotypic and genetic data from over  
432 half a million UK individuals between ages 40 and 69 years at recruitment<sup>77</sup>. In this study, we restricted  
433 our analysis to the largest ancestry subset (i.e., the White British population) of 29,661 unrelated  
434 individuals who have both genetic and cardiac magnetic resonance imaging (MRI) data from the UKBB  
435 (Supplementary Table 1). More specifically, we considered only those individuals from the UKBB cohort  
436 who self-reported as White British and have similar genotypic backgrounds based on principal  
437 components analysis as described in prior work<sup>77</sup>. We also identified related individuals (i.e., third-  
438 degree relatives or closer) via genotyping and omitted all but one individual from each related group in  
439 the analysis. Details regarding this cohort refinement have been described and implemented  
440 previously<sup>77,78</sup>. This refinement resulted in a cohort of 337,535 unrelated White British individuals from  
441 the UKBB, of which 29,661 have both genetic and cardiac MRI data. We randomly split this data into  
442 training, validation, and test sets of size 15,000, 5,000, and 9,661 individuals, respectively.

### 443 **Genotyping and quality control**

444 For the study cohort of 29,661 individuals described above, we leveraged genotype data from  
445 approximately 15 million imputed autosomal SNVs. These have been imputed from 805,426 directly  
446 assayed SNVs (obtained by the UKBB from one of two similar Affymetrix arrays) using the Haplotype  
447 Reference Consortium and UK10K reference panels<sup>77</sup>. Imputed variants were subject to several quality-  
448 control filters, including outlier-based filtration on effects due to batch, plate, sex, array, and  
449 discordance across control replicates. Further, we excluded variants due to extreme heterozygosity,  
450 missingness, minor allele frequency ( $< 10^{-4}$ ), Hardy-Weinburg equilibrium ( $< 10^{-10}$ ), and poor imputation  
451 quality ( $< 0.9$ ). Further details can be found in previous studies<sup>77,78</sup>.

452 **Quantification of left ventricular hypertrophy**

453 We retrieved cardiac MRI images from 44,503 UKBB participants, taken during their most recent  
454 imaging visit, and closely followed the method previously described by Bai et al.<sup>28</sup>. A fully  
455 convolutional network<sup>28</sup> was previously trained using a dataset of 4,875 subjects with 93,500 pixelwise  
456 segmentations of UKBB short-axis cardiac MRI multi-slice images generated manually with quality  
457 control checks for inter-operator consistency<sup>79</sup>. The cardiac MRI image resolution was 1.8 x 1.8 mm<sup>2</sup>,  
458 with a slice thickness of 8.0 mm and gap of 2.0 mm, typically consisting of 10 slices. Each slice was  
459 converted to an image and cropped to a 192 x 192 square, and measurements were 0-1 normalized.  
460 The network architecture employed multiple convolutional layers to learn image features across five  
461 resolution scales. Each scale involved two or three convolutions with kernel size 3 x 3 and stride 1 or 2  
462 (2 appearing every 2 or 3 layers), followed by batch normalization and ReLU transformation. Feature  
463 maps from the five scales were upsampled back to the original resolution, combined into a multi-scale  
464 feature map, and processed through three additional convolutional layers with kernel size 1 x 1,  
465 followed by a softmax function to predict the segmentation label for each pixel. For an exact description  
466 of the model architecture, we refer to the original publication on the model<sup>28</sup>. Notably, each of the  
467 pixelwise annotations used for training and evaluation was hand-segmented by a human expert and  
468 validated for quality. Furthermore, the model was validated in the UKBB and demonstrated strong  
469 concordance with the human-generated gold standard<sup>28</sup>, ensuring that model predictions in the same  
470 dataset are of high quality. To our knowledge, this is the only published model trained in the UKBB on  
471 gold standard labels. We thus applied this trained deep learning model to our entire dataset of 44,503  
472 cardiac MRIs. This resulted in segmentations of the LV cavity and myocardium from each short axis  
473 frame, which allowed for both an area calculation of each segment as well as the application of quality  
474 control checks<sup>28</sup> based on consistency within and between slices and time steps. There were 44,219  
475 segmentations that passed the quality control. Using the calculated areas, we computed the volume of  
476 the LV myocardium through simple integration over slices. This volume was then converted to a left  
477 ventricular mass (LVM) using a standard density estimate of 1.05 g/mL<sup>35</sup>. LVMi was computed by  
478 dividing LVM by an estimate of body surface area based on height and body weight calculated using

479 the Du Bois formula<sup>36</sup>. From the 44,219 segmentations, we restricted the analysis to LVMi  
480 measurements for 29,661 unrelated White British individuals using the measurements from their most  
481 recent imaging visit if multiple imaging visits were recorded.

#### 482 **Lo-siRF step 1: Dimension reduction of variants via genome-wide association studies**

483 As the first step in the lo-siRF pipeline, we performed a genome-wide association study (GWAS) on the  
484 training data for the rank-based inverse normal-transformed LVMi using two algorithms, PLINK<sup>37</sup> and  
485 BOLT-LMM<sup>38</sup>, in order to filter the number of features from over 15 million SNVs to a more  
486 computationally-feasible size (Fig. 2b). This step is akin to typical screening phases in fine-mapping<sup>80</sup>  
487 and other tree-based epistasis detection methods<sup>72,81</sup>. Since BOLT-LMM and PLINK rely on different  
488 statistical models, we chose to employ both implementations to mitigate the dependence of  
489 downstream conclusions on this arbitrary choice. Specifically, for the first GWAS run, we fitted a linear  
490 regression model, implemented via ``glm`` in PLINK<sup>32</sup>. For the second GWAS run, we used BOLT-  
491 LMM<sup>38</sup>, a fast Bayesian-based linear mixed model method. Each GWAS was adjusted for the first five  
492 principal components of ancestry, sex, age, height, and body weight. We then ranked the SNVs by  
493 significance (i.e., the GWAS  $p$ -value) for each GWAS run separately and took the union of the top 1000  
494 SNVs (without clumping) from each of the two GWAS runs. This resulted in a set of 1405 GWAS-  
495 filtered SNVs that were used in the remainder of the lo-siRF pipeline. Here, we chose to use the top  
496 1000 SNVs per GWAS method (without clumping) as it yielded the highest validation prediction  
497 accuracy compared to choosing other possible thresholds (500 and 2000 SNVs per GWAS with and  
498 without clumping). Though the GWAS is not the focus of this work, we provide a summary of the PLINK  
499 and BOLT-LMM GWAS results for completeness and for comparison in Extended Data 1. We also  
500 provide a list of the 1405 GWAS-filtered SNVs in Extended Data 2. We note that these 1405 GWAS-  
501 filtered SNVs strictly contain the SNVs that passed the genome-wide significance threshold ( $p = 5E-8$ ).

#### 502 **Lo-siRF step 2: Binarization of the left ventricular mass phenotype**

503 Next, we partitioned the raw (continuous) LVMi phenotype into a low, middle, and high LVMi group  
504 before fitting signed iterative random forest to classify individuals with low versus high LVMi (Fig. 2c).

505 That is, for a given threshold  $x$ , we binned individuals within the top and bottom  $x\%$  of LVMi values into  
506 two classes with the high and low LVMi values, respectively, while omitting the individuals in the middle  
507 quantile range. Due to the sex-specific biological variation of LVMi (Supplementary Note 1), we  
508 performed this partitioning for males and females separately. For males, low and high LVMi was  
509 considered under 43.8-46.0 g/m<sup>2</sup> and above 55.4-58.5 g/m<sup>2</sup>, respectively, depending on our choice of  
510 binarization threshold (Supplementary Table 2). For females, low and high LVMi was defined as under  
511 35.1-36.8 g/m<sup>2</sup> and above 43.8-46.1 g/m<sup>2</sup>, respectively, depending on our choice of binarization  
512 threshold. We performed this binarization step in order to simplify the original low-signal regression  
513 problem into a relatively easier binary classification task: to distinguish between individuals with very  
514 high LVMi from those with very low LVMi. This binarization approach was motivated by the observation  
515 that the validation  $R^2$  values from the original regression problem of predicting each individual's raw  
516 (continuous) LVMi were smaller than 0 (Supplementary Table 3 and Supplementary Note 1), raising the  
517 question of whether the regression models were capturing anything relevant to reality. At a minimum  
518 however, the PCS framework for veridical data science<sup>26</sup> advocates the importance of ensuring that the  
519 model fits the data well, as measured by prediction accuracy, before trusting any extracted  
520 interpretations from that model. We will see in the next section that the binarization procedure not only  
521 strengthened the prediction signal but also helped us more readily interpret and assess the  
522 performance of prediction methods with respect to the prediction screening step of the PCS  
523 framework<sup>26</sup>. We importantly note that the practical use of this approach depends heavily on whether  
524 understanding the differences between the high and low categories is relevant to the scientific goals.  
525 Here, we believe that the connection between cardiac hypertrophy and those with high LVMi helps to  
526 justify the binarization approach and that studying how individuals with high LVMi differ from those on  
527 the other end of the spectrum may yield relevant scientific insights. Since the specific threshold choice  
528 is arbitrary, we ran the remainder of the lo-siRF pipeline using three different binarization thresholds  
529 (15%, 20%, 25%) to balance the improvement in prediction signal and amount of data lost. In the end,  
530 we aggregated the results that were stable across all three binarization thresholds, described in the  
531 Method section *Lo-siRF step 4.4: Ranking genetic loci and interactions between loci*.

### 532 **Lo-siRF step 3: Prediction**

533 *Lo-siRF step 3.1: Fitting signed iterative random forest on the binarized LV mass index phenotype*

534 For each binarization threshold, we trained a signed iterative random forest (siRF) model<sup>23</sup> using the  
535 1405 GWAS-filtered SNVs to predict the binarized LVmi phenotype and generate candidate interactions  
536 for further investigation (Fig. 2d). siRF first iteratively grows a sequence of feature-weighted random  
537 forests, re-weighting features in each iteration proportional to their feature importance from the previous  
538 iteration in order to stabilize the decision paths. Then, provided that the resulting stabilized forest  
539 provides reasonable prediction performance (see the Methods section *Lo-siRF step 3.2: Prediction*  
540 *check*), siRF leverages a computationally-efficient algorithm, random intersection trees<sup>83</sup>, to identify  
541 nonlinear higher-order interaction candidates based on frequently co-occurring features on a decision  
542 path. Intuitively, sets of features that frequently co-occur along a decision path together are more likely  
543 to interact and are identified by siRF. siRF is particularly attractive for prioritizing epistatic interactions  
544 as (1) it offers an interaction search engine that can automatically search for higher-order interactions  
545 with the same order of computational cost as a traditional random forest, and (2) the thresholding  
546 behavior of its decision trees resembles the thresholding (or switch-like) behavior commonly observed  
547 in biomolecular interactions<sup>68</sup>. Further, siRF improves upon its predecessor, iterative random forests<sup>22</sup>,  
548 by not only tracking which sets of features commonly co-occur on decision paths, but also the sign of  
549 the features, i.e., whether low values (denoted  $X^-$ ) or high values (denoted  $X^+$ ) of feature  $X$ , appear on  
550 the decision path. We refer to Kumbier et al.<sup>23</sup> for details, but in brief, the signed feature  $X^-$  (or  
551 respectively,  $X^+$ ) signifies that a decision rule of the form  $X < t$  (or respectively,  $X > t$ ) for some threshold  
552  $t$  appeared on the decision path. siRF hence outputs a list of candidate *signed* interactions, where each  
553 signed interaction consists of two or more signed features that frequently co-occur on the same  
554 decision path. Note when applying siRF to SNV data in practice, the signed feature  $SNV^+$  typically  
555 represents a heterozygous or homozygous mutation while the signed feature  $SNV^-$  typically represents  
556 no mutation at the locus. The following hyperparameters were used to train siRF using the iRF2.0 R  
557 package: number of iterations = 3, number of trees = 500, number of bootstrap replicates = 50, depth of  
558 random intersection tree (RIT) = 3, number of RIT = 500, number of children in RIT = 5, and minimum

559 node size in RIT = 1. We did not perform hyperparameter tuning since siRF has been previously shown  
560 to be robust to different choices of hyperparameters<sup>23</sup>. We fit siRF using 10,000 training samples  
561 (randomly sampled out of the 15,000 total training samples) and reserved the remaining 5,000 training  
562 samples for selecting genetic loci for the permutation test (see the Method section *Lo-siRF step 4.3:*  
563 *Permutation test for difference in local stability importance scores*).

#### 564 *Lo-siRF step 3.2: Prediction check*

565 Per the PCS framework for veridical data science<sup>26</sup>, we next assessed the validation prediction  
566 accuracy of siRF (Fig. 2d) to evaluate whether the learnt model is capturing some biologically-relevant  
567 phenotypic signal, rather than simply noise, before proceeding to interpret this model in step 4 of lo-  
568 siRF. To serve as baseline comparisons, we fit other popular machine learning prediction methods,  
569 namely,  $L_1$ -regularized (LASSO) logistic regression<sup>84</sup>,  $L_2$ -regularized (ridge) logistic regression<sup>85</sup> using  
570 glmnet in R, random forests<sup>86</sup> using ranger in R, support vector machines<sup>87</sup> with the radial basis kernel  
571 using sklearn's SVC in Python, a multilayer perceptron<sup>88</sup> (fully-connected feedforward neural network  
572 with one hidden layer and ReLU activations) using sklearn's MLPClassifier in Python, and AutoGluon  
573 TabularPredictor<sup>89</sup> (an auto machine learning framework which ensembles multiple models, including  
574 neural networks, LightGBM, boosted trees, random forests, and k nearest neighbors, by stacking them  
575 in multiple layers) in Python. We used the following hyperparameters and tuned using 5-fold cross-  
576 validation where applicable:

- 577 •  $L_1$ - and  $L_2$ -regularized logistic regression: default  $\lambda$  grid from glmnet::cv.glmnet in R;
- 578 • Random forests: default parameters from ranger::ranger in R;
- 579 • Support vector machine with radial basis kernel: regularization parameter C = 1E-4, 1E-3, ...,  
580 1E3, 1E4;
- 581 • Multilayer perceptron: number of neurons in the hidden layer = 8, 16, 32, 64, 128, 256;  $L_2$ -  
582 regularization parameter  $\alpha$  = 1E-4, 1E-3, 1E-2;
- 583 • AutoGluon TabularPredictor: trained with the "medium quality" and "good quality" presets.



584 We also compared siRF to a basic polygenic risk score. Specifically, we used PLINK to construct a  
585 polygenic risk score using the lead SNVs from FUMA for the LVMi PLINK GWAS that passed the  
586 suggestive significance threshold of  $1E-5$  (Extended Data 1), and we fit a logistic regression using this  
587 polygenic risk score as a predictor of the binarized LVMi. We evaluated prediction performance for  
588 each of these methods according to multiple metrics: classification accuracy, area under the receiver  
589 operator curve (AUROC), and area under the precision-recall curve (AUPRC). We observed that the  
590 prediction power of siRF, though weak ( $\sim 55\%$  balanced classification accuracy,  $\sim 0.58$  AUROC, and  
591  $\sim 0.57$  AUPRC), was greater than these other commonly used prediction methods across all  
592 binarization thresholds and evaluation metrics, except for the 15% binarization threshold where siRF  
593 performed second-best with respect to classification accuracy (Supplementary Table 4). Since siRF  
594 performed better than random guessing (i.e.,  $>50\%$  balanced classification accuracy and  $>0.5$   
595 AUROC/AUPRC, which is not guaranteed given the high phenotypic diversity of the LVMi trait) and  
596 demonstrated higher prediction power than alternative popular prediction methods, we deemed that the  
597 siRF fit for LVMi passed the prediction screening step of the PCS framework. Hence, we proceeded to  
598 interpret this siRF model and prioritize candidate interactions in step 4 of lo-siRF. We note also that this  
599 prediction check played a key role in our choice of phenotypic data. Prior to studying LVMi, we  
600 attempted to run a similar analysis to predict hypertrophic cardiomyopathy (HCM) diagnosis, defined as  
601 any ICD10 billing code diagnosis of I42.1 or I42.2 in the UKBB data. However, neither siRF nor the  
602 other aforementioned prediction methods passed the 50% balanced classification accuracy  
603 requirement for predicting HCM diagnosis. We thus chose not to proceed with the HCM analysis given  
604 the poor prediction accuracy and uncertain relevance between the prediction models and the  
605 underlying biological processes. This failed prediction check motivated the need for a more refined  
606 phenotypic measure of cardiac hypertrophy, which ultimately led to the deep learning extraction of  
607 cardiac MRI-derived LVMi. Further discussion of the HCM analysis can be found in Supplementary  
608 Note 1.

#### 609 **Lo-siRF step 4: Prioritization**

610 To lastly interpret the siRF fit for LVMI, we developed a novel stability-driven importance score to  
611 prioritize genetic loci and more interestingly, interactions between loci for follow-up experimental  
612 validation (Fig. 2e). The assessment of importance at the level of genetic loci, instead of individual  
613 variants, is necessary since variant-level importances here are incredibly unstable (detailed in  
614 Supplementary Note 1). This is due to the high correlation between SNVs in LD and the weak  
615 phenotypic signal. Consequently, our new importance score aims to aggregate weak, unstable variant-  
616 level importances into stronger, more stable locus-level importances via three steps: (1) assigning each  
617 variant to a genetic locus, (2) evaluating the local (or per-individual) importance of each genetic loci or  
618 interaction between loci in the siRF fit via a stability-driven measure, and (3) conducting a permutation  
619 test to summarize the importance of the genetic locus or interaction between loci across all individuals.  
620 We provide details for each step next.

##### 621 *Lo-siRF step 4.1: Aggregation of SNVs into loci*

622 We aggregated SNVs into a genetic locus based on genomic proximity. Specifically, we used  
623 ANNOVAR<sup>90</sup> to assign each SNV that appears in the siRF fit to a genetic locus according to the hg19  
624 refSeq Gene annotations (i.e., given by the 'Gene.refGene' column in the ANNOVAR output).  
625 ANNOVAR uses a default of 1 kb as the maximum distance between SNVs and gene boundaries. Note  
626 that from these annotations, each SNV is assigned to exactly one genetic locus. Thus, herein in the  
627 context of lo-siRF, a genetic locus is a (non-overlapping) group of SNVs, and a signed genetic locus is  
628 a (non-overlapping) group of signed SNVs with the specified sign (i.e.,  $Locus^+$  consists of  $SNV_1^+$ , ...,  
629  $SNV_p^+$  while  $Locus^-$  consists of  $SNV_1^-$ , ...,  $SNV_p^-$ ).

##### 630 *Lo-siRF step 4.2: Local stability importance score*

631 We next measured the importance of a genetic locus or interaction between loci based on their stability,  
632 or frequency of occurrence, within the siRF fit (i.e., the total number of times that SNVs from a  
633 particular locus or interaction were split upon in the fitted forest). However, because the number of  
634 variants assigned to each genetic locus can vary, the raw frequency of occurrence will be biased

635 towards larger loci (i.e., those with more variants). A more detailed discussion is provided in  
636 Supplementary Note 1. To address this issue, we developed a *local* (or per-individual) *stability*  
637 *importance score*, which quantifies the importance of a signed locus or interaction between loci for  
638 making the prediction for each individual. Let  $G = \{g_1, \dots, g_K\}$  denote a signed order- $K$  interaction  
639 involving the signed genetic loci  $g_1, \dots, g_K$ , and let  $v_1^{(j)}, \dots, v_{p_j}^{(j)}$  denote the signed SNVs belonging to  
640 the signed genetic locus  $g_j$ . Then given a forest  $T$ , a signed interaction between loci  $G$ , and individual  $i$ ,  
641 the *local stability importance score*,  $LSI_T(G, i)$ , is defined as  $D_T(G, i) / |T|$ , where  $|T|$  is the number of  
642 trees in the forest  $T$ , and  $D_T(G, i)$  is the number of decision paths in the forest  $T$  for which two criteria  
643 are satisfied: (1) individual  $i$  appears in its terminal node and (2) for each  $j = 1, \dots, K$ , there exists an  
644  $l \in \{1, \dots, p_j\}$  such that  $v_l^{(j)}$  was used in a decision split along the path (Extended Data Fig. 3a). In  
645 other words,  $LSI_T(G, i)$  is the proportion of trees in the forest  $T$  for which at least one signed variant  
646 from each signed locus in the signed interaction  $G$  was used in making the prediction for individual  $i$ . A  
647 high score indicates that the signed interaction  $G$  was frequently used to predict individual  $i$ 's response  
648 and is an important interaction for individual  $i$ . Note that a genetic locus can be viewed as an order-1  
649 interaction, and thus, this local stability importance score can also be applied to assess the (marginal)  
650 importance of a single genetic locus.

#### 651 *Lo-siRF step 4.3: Permutation test for difference in local stability importance scores*

652 Once we obtained these local stability importance scores for each individual, we performed a two-  
653 sample permutation test (Extended Data Fig. 3a) to assess whether the local stability importance  
654 scores for a given signed locus or interaction between loci,  $G$ , are different between individuals with  
655 high and low LVMi (conditional on the rest of the fitted forest). More formally, the proposed permutation  
656 test tests the null hypothesis  $L = H$  versus the alternative hypothesis  $L \neq H$ , where  $L$  and  $H$  are the  
657 distributions of local stability importance scores for individuals with low and high LVMi, respectively. If  
658 the local stability importance scores are indeed different between high and low LVMi individuals (thus  
659 giving a small permutation  $p$ -value), this indicates that  $G$  can differentiate between individuals with high  
660 versus low LVMi given the fitted siRF and hence is an important locus or interaction between loci for

661 LVMi. We performed this permutation test using 10,000 permutations, the difference in means as the  
662 test statistic, and the 5,000 validation samples. To bolster the reliability of our findings, we only tested a  
663 conservative subset of genetic loci and interactions between loci that passed predictive and stability  
664 checks in accordance with the PCS framework. Namely, we tested:

- 665 (a) The top 25 genetic loci, ranked by their average local stability importance scores across 5,000  
666 samples. These 5,000 samples were previously set-aside from within the 15,000 training samples  
667 and were not used in fitting the siRF (see the Methods section *Lo-siRF step 3.1: Fitting signed  
668 iterative random forest on the binarized LV mass index phenotype*);
- 669 (b) The signed interactions between loci that were stably identified by siRF across 50 bootstrap  
670 replicates. Here, we performed the random intersection trees search within siRF at the locus-level  
671 (i.e., using the variant-to-locus assignment as the hyper-features or `\varnames.grp`` argument when  
672 running siRF in R), and we defined a “stable” interaction as one that passed the following siRF  
673 stability metric thresholds: stability score  $> 0.5$ , stability score for mean increase in precision  $> 0$ ,  
674 and stability score for independence of feature selection  $> 0^{22,23}$  (Supplementary Table 6). Briefly,  
675 the stability score measures how frequently the interaction appears in siRF. The stability score for  
676 mean increase in precision threshold requires that the interaction is predictive of the response. The  
677 stability score for feature selection dependence threshold helps to filter out additive interactions (as  
678 opposed to the desired non-additive interactions). Details on the siRF interaction and stability  
679 metrics can be found in previous work<sup>23</sup>.

680 We reiterate that given the complexities and challenges associated with the low-signal data under  
681 study, we utilize these permutation  $p$ -values primarily as a summary statistic to rank candidate loci and  
682 interactions (detailed next), rather than as an assessment of statistical significance, which relies heavily  
683 on untestable model assumptions that often do not hold in practice.

#### 684 *Lo-siRF step 4.4: Ranking genetic loci and interactions between loci*

685 Before ranking the top lo-siRF recommendations for follow-up experimental validation, we incorporated  
686 one final stability check, recommending only those signed loci and interactions between loci that

687 underwent the permutation test and yielded a  $p$ -value  $< 0.1$  in all three binarization runs. For these  
688 signed loci and interactions between loci that were stably important in all three binarization runs, we  
689 ranked them by the mean permutation  $p$ -value, averaged across the three binarization thresholds  
690 (Supplementary Table 5). Because of our emphasis on prioritizing candidates for experimental  
691 validation, if both the + and - version of the signed locus (or interaction) appear, the final prioritized loci  
692 (or interaction) are ranked according to the smaller one of the two  $p$ -values (Fig. 2f). We note that  
693 though the signed information is not pertinent to our goal of recommending candidates for experiments,  
694 the signed information from siRF provides more granular information that can improve our interpretation  
695 of the fit, and we discuss this further in Supplementary Note 1. We also provide the permutation  $p$ -  
696 values for all conducted permutation tests (including the loci and interactions between loci that were  
697 unstable across binarization thresholds) in Supplementary Note 1.

#### 698 **Lo-siRF: PCS documentation and additional stability analyses**

699 We acknowledge that many human judgment calls were inevitably made throughout our veridical  
700 machine learning pipeline and that alternative choices could have been made (e.g., different dimension  
701 reduction techniques, binarization procedures, and prediction models). In an effort to facilitate  
702 transparency of these human judgment calls, we provide extensive documentation, discussion, and  
703 justification in Supplementary Note 1. In particular, Supplementary Note 1 includes a discussion of our  
704 reasoning and motivation behind the choice of phenotypic data as well as choices in the dimension  
705 reduction, binarization, prediction, and prioritization steps. We also performed additional stability  
706 analyses in accordance with the PCS framework<sup>26</sup>, to ensure that our findings are stable and robust to  
707 these human judgment calls (e.g., the choice of GWAS method and binarization threshold) and to  
708 bolster the reproducibility of our findings. Supplementary Note 1 is an HTML document, which can be  
709 downloaded and displayed in a browser or found at [https://yu-group.github.io/epistasis-cardiac-](https://yu-group.github.io/epistasis-cardiac-hypertrophy/)  
710 [hypertrophy/](https://yu-group.github.io/epistasis-cardiac-hypertrophy/).

## 711 **Non-hypertensive cohort analysis**

712 We defined hypertensive individuals as anyone with self-reported hypertension, high blood pressure as  
713 diagnosed by a doctor, or any ICD10 billing code diagnosis in I10-I16. Out of the 29,661 UKBB  
714 participants in the original lo-siRF analysis, 7,371 individuals had hypertension, leaving 22,290  
715 individuals for the non-hypertensive analysis. Specifically, using the same set of 1405 GWAS-filtered  
716 SNVs as in the original lo-siRF analysis, we performed steps 2-4 of the lo-siRF analysis using only the  
717 non-hypertension cohort. We also assessed the marginal effect of each of the 1405 GWAS-filtered SNV  
718 on hypertension. Here, we fit logistic regression models, regressing hypertension (i.e., a binary  
719 indicator of whether or not one has hypertension) on each SNV marginally, while adjusting for the first  
720 five principal components of ancestry, sex, age, height, and body weight. A more detailed discussion of  
721 the non-hypertension analysis results can be found in Supplementary Note 1.

## 722 **Implementation of existing epistasis detection methods**

723 *Exhaustive regression-based pairwise interaction scan*<sup>39,40</sup>

724 For each pair of SNVs that passed the GWAS filter in lo-siRF step 1, we fit the follow regression:

$$734 \quad y_i = \beta_0 + \beta_1 g_{i1} + \beta_2 g_{i2} + \beta_{12} g_{i1} g_{i2} + \boldsymbol{\gamma}^T \mathbf{z}_i + \epsilon_i,$$

725 where  $y_i$  is the rank-based inverse normal-transformed LVMi for individual  $i$ ,  $g_{ij}$  is the genotype of SNV  
726  $j$  for individual  $i$ ,  $\mathbf{z}_i$  is a vector of covariates for individual  $i$  (i.e., sex, age, height, body weight, and the  
727 first five principal components of ancestry), and  $\epsilon_i$  is the random error or noise term for individual  $i$ .

728 Under this regression model, we tested the null hypothesis of  $\beta_{12} = 0$  versus the alternative hypothesis  
729 of  $\beta_{12} \neq 0$  via the traditional t-test. We also repeated this exhaustive interaction search using the  
730 binarized LVMi response for each of the three different binarization thresholds (15%, 20%, and 25%).  
731 For the binarized LVMi, we used a logistic regression in lieu of the linear regression and tested for a  
732 non-zero  $\beta_{12}$  coefficient via the traditional Wald z-test. For brevity, we defer results to Supplementary  
733 Note 1.

735 *MAPIT*<sup>41</sup>

736 MAPIT leverages a variance component model to first identify candidate variants with non-zero  
737 marginal epistatic effects, defined as the total pairwise interaction effect between the variant and all  
738 other variants<sup>41</sup>. By focusing on these marginal epistatic effects, MAPIT can advantageously search for  
739 epistatic variants without enduring the computational and statistical burdens associated with pinpointing  
740 their epistatic partners. We performed MAPIT using the mvMAPIT (v2.0.3) R package. For inputs, we  
741 used the 1405 GWAS-filtered SNVs with minor allele frequency > 0.05, adjusted for sex, age, height,  
742 body weight, and the first five principal components of ancestry, and used the rank-based inverse  
743 normal-transformed LVMi as the response. We used the default settings in the mvmapit function and  
744 chose the “normal” test to minimize the computational burden. We provide the results in Supplementary  
745 Note 1.

#### 746 **Implementation of existing set-based genome-wide association tests**

747 To investigate the importance of the *IGF1R* locus using existing set-based association methods, we  
748 performed SKAT-O<sup>53</sup> using the subset of 1405 GWAS-filtered SNVs with minor allele frequency > 0.05  
749 as input and the rank-based inverse normal-transformed LVMi as the response. We also adjusted for  
750 sex, age, height, body weight, and the first five principal components of ancestry in the SKAT-O null  
751 model. This analysis was carried out using the SKAT (v2.2.5) R package. In addition to SKAT-O, we  
752 also ran the gene-based test as computed by MAGMA<sup>54</sup> (v1.6) using the LVMi PLINK GWAS results as  
753 input. This MAGMA analysis was carried out using FUMA with the default settings. Results of these two  
754 analyses are detailed in Supplementary Note 1.

#### 755 **Functional interpretation of lo-siRF-prioritized variants**

##### 756 *Functional interpretation step 1: Extraction of candidate SNVs and LD structures*

757 Our lo-siRF approach described above identified a total of 283 SNVs located within 6 LVMi genetic risk  
758 loci (Fig. 2f). In order to explore the functional consequences of these prioritized genetic variants and  
759 identify genes that are potentially involved in the trait of LV hypertrophy, we performed functional  
760 mapping and annotation using a web-based platform, FUMA (v1.5.4)<sup>44</sup>. The SNP2GENE function in

761 FUMA was used to incorporate LD structure and prioritize candidate genes. Taking the GWAS  
762 summary statistics from PLINK<sup>37</sup> and BOLT-LMM<sup>38</sup> as an input, we submitted the 283 lo-siRF-  
763 prioritized SNVs into SNP2GENE as predefined SNVs. This allows SNP2GENE to define LD blocks for  
764 each of the 283 lo-siRF-prioritized SNV and use the given 283 SNVs and SNVs in LD with them for  
765 further annotations. We adopted the default  $r^2$  threshold (i.e., 0.6) for defining independent significant  
766 SNVs. Because any two of the 283 lo-siRF-prioritized SNVs are in LD with each other at  $r^2 < 0.6$ , all of  
767 the 283 SNVs were defined as independent significant SNVs by FUMA. In order to match the  
768 population group used for our lo-siRF prioritization, the reference panel from UKBB release 2b that  
769 FUMA created for British and European subjects was chosen for the computation of  $r^2$  and minor allele  
770 frequencies. A total of 572 candidate SNVs in strong LD ( $r^2 < 0.6$ ) with any of the 283 independent  
771 significant SNVs were extracted from both the inputted GWAS (with the maximum  $p$ -value threshold  
772 being 0.05) and the reference panel. These 572 candidate SNVs were then assigned to one of the six  
773 lo-siRF-identified loci (Fig. 2f) based on its corresponding independent significant SNV, which showed  
774 the maximum  $r^2$  value in LD with the given candidate SNV. A combination of the 283 independent  
775 significant SNVs and the 572 FUMA-extracted candidate SNVs in LD with the independent significant  
776 SNVs (details in Extended Data 4) was defined as the lo-siRF-prioritized SNV set, which was used to  
777 generate the list of lo-siRF-prioritized genes (Fig. 4a) for the following enrichment analysis (Fig. 4c-4e).  
778 As a comparison to the lo-siRF-prioritized SNV set, we uploaded all 1405 GWAS-filtered SNVs  
779 (Extended Data 2) as the predefined SNVs in a separate SNP2GENE job. Using the same approach  
780 and parameter settings, 929 independent significant SNVs were identified within the given 1405  
781 GWAS-filtered SNVs, and 5771 candidate SNVs in LD with the 929 independent significant SNVs were  
782 extracted by FUMA. A combination of the 929 independent significant SNVs and the 5771 candidate  
783 SNVs were defined as the reference SNV set. This reference SNV set is purely generated from GWAS  
784 prioritization and excludes the evaluation of epistatic effects between genetic variants by lo-siRF.  
785 Genes functionally mapped from the reference SNV set was used as a comparison group for the lo-  
786 siRF-prioritized gene list in the following enrichment analysis to explore the specific contribution of the



787 identified epistatic genes in the enriched gene ontologies, pathways, and transcription factors (Fig. 4c-  
788 4e).

789 *Functional interpretation step 2: ANNOVAR enrichment test*

790 To evaluate the functional consequences of the lo-siRF-prioritized genetic loci, we performed  
791 ANNOVAR enrichment test of the aforementioned 283 independent significant SNVs and 572  
792 candidate SNVs in LD with them against the selected reference panel in FUMA. The FUMA  
793 SNP2GENE process generated unique ANNOVAR<sup>90</sup> annotations for all the identified SNVs. The  
794 enrichment score for a given annotation in a given lo-siRF-prioritized genetic locus (Fig. 3b) was  
795 computed as the proportion of SNVs associated to that locus with the given annotation divided by the  
796 proportion of SNVs with the same annotation relative to all available SNVs in the reference panel. For  
797 the  $i^{\text{th}}$  ANNOVAR annotation in the  $j^{\text{th}}$  lo-siRF-prioritized locus, the enrichment  $p$ -value was computed  
798 by performing a two-sided Fisher's exact test on the 2-by-2 contingency table containing  $n_j(i)$ ,

799  $\sum_t n_j(t) - n_j(i)$ ,  $N(i) - n_j(i)$ , and  $\sum_t N(t) - \sum_t n_j(t) - n_j(i)$ . Here,  $n_j(i)$  is the number of SNVs

800 with the  $i^{\text{th}}$  annotation in the  $j^{\text{th}}$  lo-siRF-prioritized locus,  $N(i)$  is the number of SNVs with the  $i^{\text{th}}$

801 annotation in the reference panel,  $\sum_t n_j(t)$  is the summation of  $n_j(i)$  for all available annotations in

802 the  $j^{\text{th}}$  lo-siRF-prioritized locus, and  $\sum_t N(t)$  is the summation of  $N(i)$  for all available annotations in

803 the reference panel. Detailed information can be found in Extended Data 5.

804 *Functional interpretation step 3: Functional annotations*

805 In addition to ANNOVAR annotations, FUMA annotated all 283 independent significant SNVs and 572  
806 SNVs in LD with them for functional consequences on potential regulatory functions (core-15 chromatin  
807 state prediction and RegulomeDB score) and deleterious effects (CADD score). In particular, the core-  
808 15 chromatin state was annotated to all SNVs of interest by ChromHMM<sup>45</sup> derived from 5 chromatin  
809 markers (H3K4me3, H3K4me1, H3K36me3, H3K27me3, and H3K9me3) for 127 tissue/cell types, of  
810 which left ventricle (E095), right ventricle (E105), right atrium (E104), and fetal heart (E083) were taken

811 into consideration in this study (Fig. 3a, circle 7). Data and a corresponding description of the core-15  
812 chromatin state model can be found at  
813 [https://egg2.wustl.edu/roadmap/web\\_portal/chr\\_state\\_learning.html](https://egg2.wustl.edu/roadmap/web_portal/chr_state_learning.html). RegulomeDB<sup>44,46</sup> annotations  
814 guide interpretation of regulatory variants through a seven-level categorical score, of which the  
815 category 1 (including 6 subcategories ranging from 1a to 1f) indicates the strongest evidence for a  
816 variant to result in a functional consequence. Because the RegulomeDB database (v1.1) used in FUMA  
817 has not been updated, we queried all SNVs identified by lo-siRF and FUMA in the RegulomeDB  
818 database v2.2 (<https://regulomedb.org/regulome-search>). Annotations for deleteriousness were  
819 obtained from the CADD database (v1.4)<sup>47</sup> by matching chromosome, position, reference, and  
820 alternative alleles of all SNVs. High CADD scores indicate highly deleterious effects of a given variant.  
821 A minimum threshold CADD score of 12.37 was suggested by Kircher et al.<sup>47</sup>. In addition to the  
822 aforementioned functional annotations, we extracted information of eQTLs and sQTLs for all  
823 independent significant SNVs and SNVs that are in LD with one of the independent significant SNVs  
824 from GTEx v8<sup>48</sup>. The eQTL information was used for eQTL gene mapping as described in the following  
825 section.

#### 826 *Functional interpretation step 4: Functional gene mapping*

827 In SNP2GENE, we performed three functional gene mapping strategies – positional, eQTL, and 3D  
828 chromatin interaction mapping – using the lo-siRF-prioritized SNV set and the reference SNV set  
829 described in the Methods section *Functional interpretation step 1: Extraction of candidate SNVs and LD*  
830 *structures*. For positional mapping<sup>44,46</sup>, a default value of 10 kb was used as the maximum distance  
831 between SNVs and genes. For eQTL mapping, *cis*-eQTL information of heart left ventricle, heart atrial  
832 appendage, and muscle skeletal tissue types from GTEx v8<sup>48</sup> was used. Only significant SNV-gene  
833 pairs (FDR < 0.05 and  $p < 1E-3$ ) were used for eQTL mapping. For 3D chromatin interaction mapping,  
834 Hi-C data of left ventricle tissue from GSE87112 was chosen with a default threshold of FDR < 1E-6. A  
835 default promoter region window was defined as 250 bp upstream and 500 bp downstream of TSS<sup>44,46</sup>.  
836 Using these three gene mapping strategies, we mapped the lo-siRF-prioritized SNV set to 21 protein-  
837 coding genes (Fig. 4a), of which 20 are HGNC-recognizable. Each of the 21 genes was also

838 functionally linked to a specific lo-siRF-prioritized LV hypertrophy risk locus (Fig. 2f), to which the  
839 highest proportion of SNVs mapped to the given gene were assigned. A Circos plot (Fig. 3a) showing  
840 comprehensive information of the lo-siRF-prioritized epistatic interactions, FUMA-prioritized eQTL SNV-  
841 to-gene connections and 3D chromatin interactions, as well as LD structures and prioritized genes was  
842 created by TBtools<sup>91</sup>. We then submitted these 21 genes to the GENE2FUNC process in FUMA and  
843 obtained GTEx gene expression data for 19 (out of the 21) genes across multiple tissue types (Fig. 4b).  
844 In addition, we used the same approach and mapped the reference SNV set (mentioned in the Methods  
845 section *Functional interpretation step 1: Extraction of candidate SNVs and LD structures*) to a separate  
846 gene set that contains 382 HGNC-approved genes. The lo-siRF-prioritized gene set and the reference  
847 gene set were used for gene set enrichment analysis that are described in the following sections.

#### 848 **Gene ontology and pathway enrichment analysis**

849 Genes that co-associate to shared gene ontology (GO) and pathway terms are likely to be functionally  
850 related. To assess the differential GO and pathway co-association among the lo-siRF-prioritized genes  
851 relative to their counterparts that were deprioritized by lo-siRF, we performed an integrative GO and  
852 pathway enrichment analysis followed by an exhaustive permutation of co-association scores between  
853 any possible gene-gene combinations found in the aforementioned 382 HGNC-approved genes (see  
854 the Methods section *Functional interpretation step 4: Functional gene mapping*).

855 In order to improve GO and pathway prioritization, we adopted the concept from Enrichr-KG<sup>57</sup> and  
856 ChEA3<sup>56</sup> to assess enrichment analysis results across libraries and domains of knowledge as an  
857 integrated network of genes and their annotations. We first queried the 382 HGNC-approved genes  
858 from the reference gene set against various prior-knowledge gene set libraries in Enrichr<sup>55</sup>  
859 (<https://maayanlab.cloud/Enrichr/>). We selected five representative libraries from the GO and pathway  
860 Enrichr categories as follows: GO biological process<sup>92,93</sup>, GO molecular function<sup>92,93</sup>, MGI Mammalian  
861 Phenotypes<sup>94</sup>, Reactome pathways<sup>95</sup>, and KEGG pathways<sup>96</sup>. Other FUMA-extracted genes that were  
862 not approved by HGNC using synonyms or aliases were discarded. This enrichment analysis allowed  
863 us to search for a union of enriched GO or pathway terms and their correspondingly annotated gene

864 sets, from which we built a co-association network. According to the method by Enrichr-KG<sup>57</sup>, nodes in  
865 the co-association network are either the enriched GO and pathway terms or genes.

866 To measure the degree of co-association to specific GO and pathway terms for two given interactor  
867 genes, we computed a co-association score for each of the 72,771 possible gene-gene combinations  
868 (from the 382 queried genes). The co-association score was calculated by  $R = N_{(A \cap B)} / N_{(A \cup B)}$ . Here,  $N_{(A \cap B)}$   
869 denotes the number of GO or pathway terms that were significantly enriched for both *gene A* and *gene*  
870 *B* in the proposed gene-gene combination, and  $N_{(A \cup B)}$  is the number of GO or pathway terms that were  
871 enriched for either *gene A* or *gene B*. For cases where  $N_{(A \cup B)} = 0$ , we defined  $R = 0$  to indicate that no  
872 GO or pathway terms were found to be co-associated with the respective gene-gene combinations. Of  
873 the 382 HGNC-approved genes, 20 genes were mapped to lo-siRF-prioritized loci by FUMA functional  
874 gene mapping (one of the 21 lo-siRF-prioritized genes is HGNC-unrecognizable and is discarded). We  
875 compared the co-association scores  $R$  for gene-gene combinations in the lo-siRF-prioritized gene set  
876 relative to the full distribution of  $R$  provided by an exhaustive permutation of all possible gene-gene  
877 combinations in the set of 382 HGNC-approved genes. The ranking of gene-gene combinations was  
878 determined by the two-sided empirical  $p$ -values. Fig. 4c displays significant co-associations (empirical  $p$   
879  $< 0.05$ ) between enriched GO or pathway terms and genes functionally mapped to lo-siRF-prioritized  
880 epistatic and hypostatic loci (Fig. 2f). Further details can be found in Extended Data 6.

### 881 **Transcription factor enrichment analysis**

882 Owing to the limitations and biases of various specific assays, we performed an integrative transcription  
883 factor (TF) enrichment analysis against multiple annotated gene set libraries in ChEA3<sup>56</sup> and Enrichr<sup>55</sup>.

884 To preserve the variety of library types, we assembled 9 gene set libraries (Fig. 4d) from distinct  
885 sources as follows:

- 886 1. Putative TF target gene sets determined by ChIP-seq experiments from ENCODE<sup>97</sup>;
- 887 2. Putative TF target gene sets determined by ChIP-seq experiments from ReMap<sup>98</sup>;
- 888 3. Putative TF target gene sets determined by ChIP-seq experiments from individual publications<sup>56</sup>;
- 889 4. TF co-expression with other genes based on RNA-seq data from GTEx<sup>48</sup>;

- 890 5. TF co-expression with other genes based on RNA-seq data from ARCHS4<sup>99</sup>;
- 891 6. Single TF perturbations followed by gene differential expression<sup>55</sup>;
- 892 7. Putative target gene sets determined by scanning PWMs from JASPAR<sup>100</sup> and TRANSFAC<sup>101</sup> at  
893 promoter regions of all human genes;
- 894 8. Gene sets predicted by transcriptional regulatory relationships unraveled by sentence-based text-  
895 mining (TRRUST)<sup>102</sup>;
- 896 9. Top co-occurring genes with TFs in a large number of Enrichr queries<sup>56</sup>.

897 Of the mentioned 9 gene set libraries, libraries 1, 3, and 5 were assembled by combining gene set  
898 libraries downloaded from both ChEA3<sup>56</sup> and Enrichr<sup>55</sup>. Libraries 2, 4, and 9 were downloaded from  
899 ChEA3<sup>56</sup>. Libraries 6, 7, and 8 were downloaded from Enrichr<sup>55</sup>. According to the integration method by  
900 ChEA3<sup>56</sup>, for libraries in which multiple gene sets were annotated to the same TF, the unique gene set  
901 with the lowest FET  $p$ -value was used. As mentioned in previous sections, we used separate FUMA  
902 SNP2GENE processes and functionally mapped lo-siRF-prioritized SNVs and all GWAS-filtered SNVs  
903 to a lo-siRF-prioritized gene set (20 HGNC-recognizable genes) and a reference gene set (382 HGNC-  
904 recognizable genes), respectively. Because the lo-siRF-prioritized gene set is a subset of the reference  
905 gene set, we considered the 362 genes complementary to the lo-siRF-prioritized gene set as the lo-  
906 siRF-deprioritized gene set. Taking the 20 lo-siRF-prioritized genes and 263 lo-siRF-deprioritized genes  
907 as two separate input gene sets, we performed enrichment analysis against the 9 gene set libraries.  
908 For each of the 9 libraries, we ranked the significance of overlap between the input gene set and the  
909 TF-annotated gene sets in that library by FET  $p$ -values. Those TFs with identical FET  $p$ -values were  
910 ranked by the same integer number. A scaled rank was then assigned to each TF by dividing the  
911 corresponding integer rank by the maximum integer rank in its respective library. We then integrated  
912 the 9 sets of TF rankings and re-ordered the TFs by two sequential criteria: (1) the number of libraries  
913 that display a significant overlap with the input gene set (FET  $p < 0.05$ ) and (2) the mean scaled rank  
914 across all libraries containing that TF. Using this method, we prioritized two distinct sets of TFs for the  
915 lo-siRF-prioritized genes (Fig. 4d, top) and lo-siRF-deprioritized genes (Fig. 4d, bottom).

916 The above analyses aim to enrich TFs based on their associations to given sets of individual genes  
917 rather than co-associations to gene pairs<sup>55,56</sup>. To evaluate the differential TF co-association between  
918 the lo-siRF-prioritized genes relative to the lo-siRF-deprioritized genes, we used the same approach  
919 described in the Methods section *Gene ontology and pathway enrichment analysis*. A TF co-  
920 association score was computed for each of the 72,771 possible gene-gene combinations from the 382  
921 genes. Still, the TF co-association score was computed by  $R = N_{(A \cap B)} / N_{(A \cup B)}$ , except that  $N_{(A \cap B)}$  and  $N_{(A \cup B)}$   
922 denote the number of enriched TF terms instead of GO or pathway terms. Pairwise interactions  
923 between lo-siRF-prioritized genes were extracted and ranked by the empirical  $p$ -values (Fig. 4e) from  
924 an exhaustive permutation of TF co-association scores for the 72,771 possible gene-gene  
925 combinations. Details regarding TF enrichment from both lo-siRF-prioritized and lo-siRF-deprioritized  
926 genes and TF co-association strengths can be found in Extended Data 7.

### 927 **Disease-state-specific gene co-expression network analysis**

928 In order to evaluate the connectivity between genes and their potential roles in the transition from  
929 healthy to failing myocardium, we compared gene-gene connectivity and changes in the topological  
930 structure between gene co-expression networks for healthy and failing human heart tissues (Fig. 5). To  
931 construct gene co-expression networks, cardiac tissue samples from 177 failing hearts and 136 donor,  
932 non-failing (control) hearts were collected from operating rooms and remote locations for RNA  
933 expression measurements. We performed weighted gene co-expression network analysis (WGCNA) on  
934 the covariate-corrected RNA microarray data for the control and heart failure networks separately (Fig.  
935 5a). Detailed steps for generating these co-expression networks, which included calculating the  
936 correlation matrix, TOM transformation, and Dynamic Tree Cut module finding, are described in our  
937 previous study<sup>60</sup>, and data for these networks is available at <https://doi.org/10.5281/zenodo.2600420>.  
938 To evaluate the degree of connectivity between correlating genes in each of the networks, we  
939 compared the edge weights between the lo-siRF-prioritized genes demonstrated in this study relative to  
940 the distribution of all possible pairwise combinations of genes (Fig. 5b and 5c). We also evaluated the  
941 difference of edge weights (Z-score normalized) between the control and heart failure networks to  
942 understand how these gene-gene connectivities change between non-failing and failing hearts (Fig.

943 5d). The two-tailed empirical  $p$ -value represents the proportion of the absolute difference in edge  
944 weights of all gene pairs that exceed the absolute difference score for gene pairs of interest. We then  
945 compared the structure of modules derived from dendrograms on the WGCNA control and heart failure  
946 networks (Extended Data Fig. 6). Modules were labeled according to Reactome enrichment analysis of  
947 genes within each module. The full gene module descriptions and Benjamini-Hochberg-adjusted  
948 enrichment  $p$ -values can be found in the Supplementary Data 5 and 6 in the study by Cordero et al.<sup>60</sup>.

### 949 **Induced pluripotent stem cell cardiomyocytes differentiation**

950 The studied patient-specific human induced pluripotent stem cells (hiPSCs) were derived from a 45-  
951 year-old female proband with a heterozygous *MYH7*-R403Q mutation. Derivation and maintenance of  
952 hiPSC lines were performed following Dainis et al.<sup>33</sup>. Briefly, hiPSCs were maintained in MTeSR  
953 (StemCell Technologies) and split at a low density (1:12) onto fresh 1:200 matrigel-coated 12 well  
954 plates. Following the split, cells were left in MTeSR media supplemented with 1  $\mu$ M Thiazovivin. The  
955 hiPSCs were maintained in MTeSR until cells reached 90% confluency, which began Day 0 of the  
956 cardiomyocyte differentiation protocol. Cardiomyocytes were differentiated from hiPSCs using small  
957 molecule inhibitors. For Days 0-5, cells were given RPMI 1640 medium + L-glutamine and B27 - insulin.  
958 On Days 0 and 1, the media was supplemented with 6  $\mu$ M of the GSK3 $\beta$  inhibitor, CHIR99021. On  
959 Days 2 and 3, the media was supplemented with 5  $\mu$ M of the Wnt inhibitor, IWR-1. Media was switched  
960 to RPMI 1640 medium + L-glutamine and B27 + insulin on Days 6-8. On Days 9-12, cells were  
961 maintained in RPMI 1640 medium + L-glutamine - glucose, B27 + insulin, and sodium lactate. On Day  
962 13, cells were detached using Accutase for 7-10 minutes at 37 °C and resuspended in neutralizing  
963 RPMI 1640 medium + L-glutamine and B27 + insulin. This mixture was centrifuged for 5 minutes at  
964 1000 rpm (103 rcf). The cell pellet was resuspended in 1  $\mu$ M thiazovivin supplemented RPMI 1640  
965 medium + L-glutamine and B27 + insulin. For the rest of the protocol (Days 14-40), cells were exposed  
966 to RPMI 1640 medium + L-glutamine - glucose, B27 + insulin, and sodium lactate. Media changes  
967 occurred every other day on Days 14-19 and every three days for Days 20-40. On Day 40,  
968 cardiomyocytes reached maturity.

969 **RNA silencing in induced pluripotent stem cell-derived cardiomyocytes**

970 Mature hiPSC-derived cardiomyocytes were transfected with Silencer Select siRNAs (Thermofisher)  
971 using TransIT-TKO Transfection reagent (Mirus Bio). Cells were incubated for 48 hours with 75 nM  
972 siRNA treatments. Four wells of cells were transfected with each of the six siRNAs: scramble,  
973 *CCDC141* (ID s49797), *IGF1R* (ID s223918), *TTN* (ID s14484), *CCDC141* and *IGF1R*, and *CCDC141*  
974 and *TTN*. After 2 days, hiPSC-CMs were collected for RNA extraction.

975 **RT-qPCR analysis for siRNA gene silencing efficiency**

976 Following cell morphology measurement, all cells for each condition were centrifuged for 5 minutes at  
977 1000 rpm (103 rcf). Cell pellets were frozen at -80 °C prior to RNA extraction. RNA was extracted using  
978 Trizol reagent for RT-qPCR to confirm gene knockdown occurred. Reverse Transcription of RNA was  
979 done using High-Capacity cDNA Reverse Transcription Kit (Thermofisher). qPCR of the single stranded  
980 cDNA was performed using TaqMan Fast Advanced MM (Thermofisher) with the following annealing  
981 temperatures: 95°C 20" and 40 cycles of 95°C 1" and 60°C 20". qPCR of the silenced genes was  
982 performed using TaqMan® Gene Expression Assays, including *CCDC141* (Hs00892642\_m1), *IGF1R*  
983 (Hs00609566\_m1), and *TTN* (Hs00399225\_m1). For gene-silencing efficiency analysis, gene RPLP0  
984 (Hs00420895\_gH) was used as a reference gene. Data were analyzed using the delta-delta Ct method.

985 **Cell sample preparation for cell morphology measurement**

986 Following siRNA treatments, cells were detached for microfluidic single-cell imaging using a mixture of  
987 5 parts Accutase and 1 part TrypLE, treated for 6 minutes at 37 °C. Cells were then added to the  
988 neutralizing RPMI 1640 medium + L-glutamine and B27 + insulin. These mixtures were centrifuged for  
989 5 minutes at 1000 rpm (103 rcf). For each gene-silencing condition, the four wells of cells were  
990 resuspended in 4 mL of the MEM medium, which is composed of MEM (HBSS balanced) medium, 10%  
991 FBS, and 1% Pen Strep (Gibco). Cells were filtered with 100 µm strainers (Corning) before adding into  
992 the microfluidic devices.



993 **Microfluidic inertial focusing device**

994 We developed a new spiral inertial microfluidics system on the basis of the study by Guan et al.<sup>31</sup> to  
995 focus randomly suspended cells into separate single streams based on cell size for high-resolution and  
996 high-throughput single-cell imaging. The microfluidic device (Extended Data Fig. 7) contains 5 loops of  
997 spiral microchannel with a radius increasing from 3.3 mm to 7.05 mm. The microchannel has a cross-  
998 section with a slanted ceiling, resulting in 80  $\mu\text{m}$  and 150  $\mu\text{m}$  depths at the inner and outer side of the  
999 channel, respectively. The channel width is fixed to 600  $\mu\text{m}$ . The 495  $\mu\text{m}$  wide slanted region of the  
1000 channel ceiling is composed of ten 7  $\mu\text{m}$  deep stairs. This particular geometry induces strong Dean  
1001 vortices in the outer half of the channel cross-section, leading to high sensitivity of size separation and  
1002 cell focusing. The device has two inlets at the spiral center to introduce cell suspensions and sheath  
1003 flow of fresh medium. At the outlet region, the channel is expanded in width and split into two outlet  
1004 channels with a width of 845  $\mu\text{m}$  for the top outlet and 690  $\mu\text{m}$  for the bottom outlet. Depths of the two  
1005 outlet channels are designed to create equal hydraulic resistance. The top and bottom outlet channels  
1006 are connected to 80  $\mu\text{m}$  and 50  $\mu\text{m}$  deep straight observation channels for high-throughput cell  
1007 imaging.

1008 **Microdevice fabrication**

1009 The spiral microchannel was fabricated by CNC micromachining a piece of laser-cut poly (methyl  
1010 methacrylate) (PMMA) sheet, which was bonded with a PMMA chip machined only with the inlet  
1011 channels and another blank PMMA chip using a solvent-assisted thermal binding process to form the  
1012 enclosed channel<sup>29</sup>. Before bonding, PMMA chips were cleaned with acetone, methanol, isopropanol  
1013 and deionized water in sequence. Droplets of a solvent mixture (47.5% DMSO, 47.5% water, 5%  
1014 methanol) were evenly spread over the cleaned chips. The PMMA chips were assembled appropriately  
1015 and clamped using a customized aluminum fixture, and then heated in a ThermoScientific Lindberg  
1016 Blue M oven at 96 °C for 2 hrs. After bonding, fluid reservoirs (McMaster) were then attached to the  
1017 chips using a two-part epoxy (McMaster). Microchannels were flushed with 70% ethanol followed by DI  
1018 water for sterilization.

1019 **High-throughput single-cell imaging**

1020 Before each experiment, microchannels were flushed with 3 mL of the MEM medium. Prepared cell  
1021 samples and fresh MEM medium were loaded into 3 mL syringes, which were connected to the  
1022 corresponding microchannel inlets using Tygon PVC tubing (McMaster). Both cells and the fresh MEM  
1023 medium were infused into the microchannel using a Pico Plus Elite syringe pump (Harvard Apparatus)  
1024 at 1.2 mL/min. Microscope image sequences of cells focused to the top and bottom observation  
1025 channels were captured using a VEO 710S high-speed camera (Phantom) with a sampling rate of 700  
1026 fps and a 5  $\mu$ sec light exposure.

1027 **Image analysis for cell feature extraction**

1028 For each gene-silencing condition of each biological repeat, 21,000 images were processed to extract  
1029 cell morphology features. To analyze cell size and shape changes induced by gene silencing, we  
1030 developed a MATLAB-based image analysis pipeline, which includes three major steps: image  
1031 preparation, feature extraction, and image post-processing (Fig. 6c). In step one, image sequences  
1032 were fed into the MATLAB program and subtracted from the corresponding background image to  
1033 correct any inhomogeneous illumination. The program automatically generates background images, in  
1034 which each pixel value is computed as the mode pixel intensity value among the same pixel of the  
1035 entire corresponding image sequence. After illumination correction, step two detects cell edges by  
1036 looking for the local maxima of the bright field intensity gradient, following which the program closes  
1037 edge gaps, removes cells connected to the image borders, cleans small features (noise), and then fills  
1038 holes to generate binary images and centroid positions for each single cell. Cell locations were then  
1039 traced and stuck cells were removed by a double-counting filter if present. The double-counting filter  
1040 excludes measurements collected around the same location with similar cell sizes using a Gaussian  
1041 kernel density method (bandwidth = 0.09) when the estimated density for a certain location and size  
1042 exceeds a particular threshold. The maximal density value for experimental runs where no repeated  
1043 measurements were observed was used as the threshold. This procedure was manually validated  
1044 using visual inspection of the removed cells. Binary images passing the double-counting filter were  
1045 used to create coordinates (X, Y) of cell outlines, which leads to a range of cell size and shape

1046 parameters, including cell diameter and area, solidity, roundness error, circularity, and intensity spatial  
1047 relationship enclosed within the cell boundary. Cell area was computed as the 2D integration of the cell  
1048 outline, and the cell diameter was computed as  $2\sqrt{Area/\pi}$ . Solidity is the ratio of cell area to the area of  
1049 the smallest convex polygon that contains the cell region. Roundness error was computed as the ratio  
1050 between the standard deviation and mean of radii on the cell outline measured from the centroid.  
1051 Circularity was calculated as  $4Area\pi/Perimeter^2$ . The 2D intensity distributions within cell outlines  
1052 were used to derive peak locations and count peak numbers, which is a measure of intensity spatial  
1053 relationship and a gating parameter to remove clumped cells. In the post-processing step, data were  
1054 cleaned using three filters with the following gating threshold. To remove large clumps, the peak-solidity  
1055 filter removes data outside of the polygonal region defined by  $\{(0.9, 0), (0.9, 3.2), (0.934, 8.26), (1, 28),$   
1056  $(1, 0)\}$  in the (solidity, peak No.) space. Then, the roundness filter removes cells with weird shapes by  
1057 excluding data with a roundness error higher than 0.3 or a circularity lower than 0.6. Finally, the small  
1058 size filter removes cell debris whose major diameter is lower than 15  $\mu\text{m}$  (12  $\mu\text{m}$ ) or minor diameter is  
1059 lower than 12  $\mu\text{m}$  (10  $\mu\text{m}$ ) for images photographed at the top (bottom) outlet microchannels.

#### 1060 **Statistical assessment of gene-silencing effects in high-throughput single-cell experiments**

1061 To analyze the experimental results, we began by examining how and where cell size distributions  
1062 differ between each of the gene/gene-pair silenced groups and their respective scrambled control  
1063 groups. We thus conducted various statistical analyses to investigate these size distribution disparities.  
1064 First, we compared the difference in median cell size (i.e., diameter measured in  $\mu\text{m}$ ) between the  
1065 gene/gene-pair silenced cells and their scrambled controls. We performed two different tests – a  
1066 Wilcoxon signed rank test (Fig. 6f) and a bootstrap quantile test at the 0.5 quantile level. In accordance  
1067 with the PCS framework, we used two different tests to ensure that our findings are robust to this  
1068 arbitrary modeling choice and that the underlying assumptions do not drive our results. We note that  
1069 the difference in median cell size was of greater interest than the difference in mean cell size due to the  
1070 heavy right-skewness of the cell size distribution. Still, as an additional stability check, we performed a  
1071 bootstrap-t test for the difference in trimmed means with varying levels of trimming (ranging from 0-0.3).

1072 These differences in trimmed mean tests (data not shown) yielded similar results to the tests for  
1073 difference in medians, providing further evidence for the robustness of our conclusions. Secondly, in  
1074 addition to comparing differences in central behavior, we compared differences in upper quantiles of  
1075 size distributions for the gene/gene-pair silenced cells versus the scrambled controls. Identifying cell  
1076 size differences at these upper quantiles, which focus on the larger, hypertrophic cells, is particularly  
1077 relevant for the pathologic phenotype of cardiac hypertrophy and its clinical implications. To assess  
1078 these differences in cell sizes at upper quantiles, we performed a bootstrap quantile test at the 0.6, 0.7,  
1079 0.8, and 0.9 quantile levels (Extended Data Fig. 8). All tests are performed on each experimental batch  
1080 separately. To be as conservative as possible when claiming a significant effect, the maximum  $p$ -value  
1081 across batches is reported in the main text. Similar analyses were conducted for assessing differences  
1082 in morphological features (i.e., cell roundness error and normalized peak number).

### 1083 **Statistical assessment of non-additivity in high-throughput single-cell experiments**

1084 We also assessed whether the silenced gene pairs (i.e., *CCDC141-TTN* and *CCDC141-IGF1R*) are  
1085 interacting in an additive or non-additive (i.e., epistatic) way to affect cell size in the high-throughput  
1086 single-cell experiments (Fig. 6g). More formally, to assess this (non-)additivity for a given gene pair, say  
1087 *gene 1* and *gene 2*, we fit the following quantile regression:

$$1097 \quad y_i = \beta_0 + \beta_1 x_{i1} + \beta_2 x_{i2} + \beta_{12} x_{i1} x_{i2} + \mu_{g_i} + \epsilon_i,$$

1088 where  $y_i$  is the diameter ( $\mu\text{m}$ ) of cell  $i$ ,  $x_{i1}$  is an indicator whether *gene 1* was silenced in cell  $i$ ,  $x_{i2}$  is an  
1089 indicator whether *gene 2* was silenced in cell  $i$ ,  $g_i$  encodes the batch identifier from which cell  $i$  came  
1090 (so that  $\mu_{g_i}$  is a batch effect term), and  $\epsilon_i$  is the random error or noise term for cell  $i$ . This regression  
1091 was fitted using the scrambled control cells ( $x_{i1} = x_{i2} = 0$ ), *gene 1*-silenced cells ( $x_{i1} = 1$ ;  $x_{i2} = 0$ ),  
1092 *gene 2*-silenced cells ( $x_{i1} = 0$ ;  $x_{i2} = 1$ ), and *gene 1 – gene 2* jointly silenced cells ( $x_{i1} = x_{i2} = 1$ ). Under  
1093 this regression model, we tested the null hypothesis of  $\beta_{12} = 0$  versus the alternative hypothesis of  
1094  $\beta_{12} \neq 0$  via a percentile bootstrap t-test and a traditional t-test (Extended Data 8) for varying quantile  
1095 levels (0.5, 0.6, 0.7, 0.8, 0.9). A small  $p$ -value suggest that the gene pair is a non-additive epistatic  
1096 interaction under the above model. We note again that two different tests were performed to check the

1098 robustness of our conclusions against modeling assumptions associated with each statistical test. To  
1099 further bolster the robustness of our conclusions, we repeated this assessment of epistasis using the  
1100 rank-based inverse normal-transformed cell diameter as the response  $y$  and under an ordinary linear  
1101 regression model, finding that both the  $p$ -values and the direction of the non-additive interaction effects  
1102 are similar to the reported quantile regression results. We thus omit these results for brevity. Since  
1103 these regression models require comparisons between gene-silencing conditions (e.g., silencing  
1104 *CCDC141* and *TTN* vs only silencing *CCDC141* vs only silencing *TTN*), and gene-silencing efficiency  
1105 varied across silencing conditions, we only include cells from experimental batches with high gene-  
1106 silencing efficiencies (>60%) for each regression. This helps to mitigate the possibility that the gene-  
1107 silencing efficiency differences are driving spurious epistatic signals. We also conducted a simulation  
1108 study to better understand how differences in gene-silencing efficiencies across batches might impact  
1109 conclusions in Supplementary Note 3 (available on the website: [https://yu-group.github.io/epistasis-  
1110 cardiac-hypertrophy/simulations\\_efficiency](https://yu-group.github.io/epistasis-cardiac-hypertrophy/simulations_efficiency)). In general, we found that differences in our observed  
1111 gene-silencing efficiencies do not typically lead to high false positive rates under the low signal-to-noise  
1112 regimes that we expect in reality. We defer further discussion to Supplementary Note 3. Similar  
1113 analyses were conducted for assessing differences in morphological features (i.e., cell roundness error  
1114 and normalized peak number).

## Main figures

**Fig. 1: Schematic of the study workflow.**

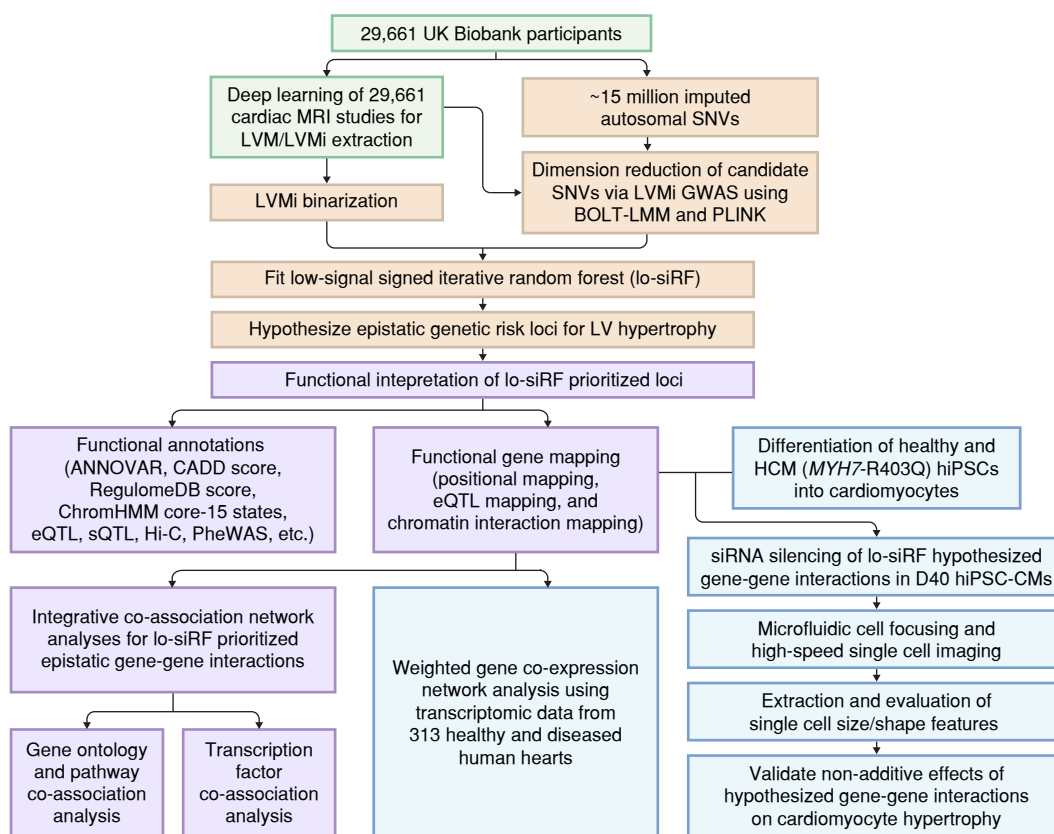

The study workflow includes four major stages: (a) derivation of left ventricular mass from cardiac magnetic resonance imaging (green boxes); (b) computational prioritization of epistatic drivers (orange); (c) functional interpretation of the hypothesized epistatic genetic loci (purple); and (d) experimental confirmation of epistasis in cardiac tissues and cells (blue). Abbreviations: MRI, magnetic resonance imaging; LV, left ventricle; LVM, left ventricular mass; LVMi, left ventricular mass indexed by body surface area; SNV, single-nucleotide variant; GWAS, genome-wide association study; BOLT-LMM<sup>38</sup> and PLINK<sup>37</sup>, two different GWAS software packages; lo-siRF, low-signal signed iterative random forest; ANNOVAR<sup>90</sup>, a software for functional annotation of genetic variants; CADD<sup>47</sup>, combined annotation dependent depletion, which scores the deleteriousness of variants; RegulomeDB<sup>46</sup>, a database that scores functional regulatory variants; ChromHMM<sup>45</sup>, a multivariate Hidden Markov Model for chromatin state annotation; eQTL, expression quantitative trait locus; sQTL,

splicing quantitative trait locus; Hi-C, high-throughput chromosome conformation capture; PheWAS, phenome-wide association study; siRNA, small interfering RNA; hiPSC-CM, human induced pluripotent stem cell-derived cardiomyocyte; HCM, hypertrophic cardiomyopathy.

**Fig. 2: Low-signal signed iterative random forest (lo-siRF) prioritizes risk loci and epistatic interactions for left ventricular hypertrophy.**

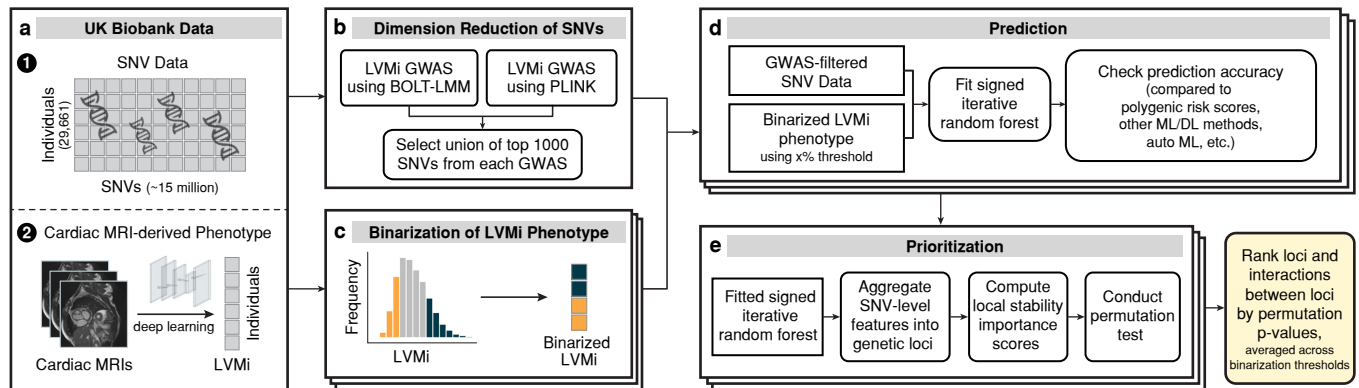

**f**

| Lo-siRF-prioritized LV hypertrophy risk loci |                          |                    |                              |                                                   |                       |                      |                      |                      |                  |                     |                |                           |                        |                      |
|----------------------------------------------|--------------------------|--------------------|------------------------------|---------------------------------------------------|-----------------------|----------------------|----------------------|----------------------|------------------|---------------------|----------------|---------------------------|------------------------|----------------------|
| Lo-siRF locus <sup>1</sup>                   | nIndSigSNVs <sup>2</sup> | nSNVs <sup>3</sup> | Lo-siRF p-value <sup>4</sup> | Lo-siRF p-value <sup>5</sup> (excl. hypertension) | Max CADD <sup>6</sup> | Min RDB <sup>7</sup> | Top SNP <sup>8</sup> | Chr:Pos <sup>9</sup> | MAF <sup>9</sup> | NEA/EA <sup>9</sup> | Function       | GWAS p-value <sup>9</sup> | GWAS Beta <sup>9</sup> | GWAS SE <sup>9</sup> |
| <i>TTN</i>                                   | 52                       | 148                | 0.009                        | 0.002                                             | 25.5                  | 1b                   | rs66733621           | 2:178799323          | 0.290            | A/G                 | intronic       | 8.78E-6                   | 0.0437                 | 0.00983              |
| <i>CCDC141</i>                               | 65                       | 85                 | 0.018                        | < 1E-3                                            | 27.3                  | 1a                   | rs7591091            | 2:178889467          | 0.298            | C/T                 | intronic       | 3.67E-11                  | -0.0646                | 0.00975              |
| <i>MIR588;RSPO3</i>                          | 75                       | 218                | 0.002                        | 0.071                                             | 20.2                  | 1b                   | rs9401921            | 6:126925592          | 0.379            | A/G                 | intergenic     | 3.14E-7                   | 0.0474                 | 0.00926              |
| <i>LOC157273;TNKS</i>                        | 76                       | 50                 | 0.142                        | 0.172                                             | 16.88                 | 1b                   | rs6999852            | 8:9478458            | 0.301            | A/G                 | intergenic     | 1.15E-5                   | -0.0426                | 0.00970              |
| <i>LSP1</i>                                  | 9                        | 11                 | 0.017                        | < 1E-3                                            | 10.91                 | 1b                   | rs569550             | 11:1865838           | 0.386            | T/G                 | ncRNA_intronic | 3.85E-6                   | 0.0423                 | 0.00915              |
| <i>IGF1R</i>                                 | 6                        | 60                 | < 1E-3                       | 0.002                                             | 17.46                 | 1a                   | rs62024491           | 15:98733068          | 0.312            | G/A                 | intronic       | 9.43E-6                   | -0.0426                | 0.00962              |

  

| Lo-siRF-prioritized epistatic interactions between LV hypertrophy risk loci |                              |                                                                   |                                      |                            |                            |
|-----------------------------------------------------------------------------|------------------------------|-------------------------------------------------------------------|--------------------------------------|----------------------------|----------------------------|
| Epistatic interaction <sup>1</sup>                                          | Lo-siRF p-value <sup>4</sup> | Lo-siRF p-value <sup>5</sup> (excluding hypertensive individuals) | Top SNP-SNV interaction <sup>8</sup> | Chr:Pos <sup>9</sup>       | nPartnerSNVs <sup>10</sup> |
| <i>CCDC141 - IGF1R</i>                                                      | < 1E-3                       | < 1E-4                                                            | rs7591091<br>rs62024491              | 2:178889467<br>15:98733068 | 133<br>62                  |
| <i>CCDC141 - TTN</i>                                                        | 0.011                        | < 1E-3                                                            | rs7591091<br>rs66733621              | 2:178889467<br>2:178799323 | 133<br>61                  |
| <i>CCDC141 - LOC157273;TNKS</i>                                             | 0.056                        | 0.007                                                             | rs7591091<br>rs6999852               | 2:178889467<br>8:9478458   | 133<br>59                  |

**a-e**, Workflow of low-signal signed iterative random forest (lo-siRF). **a**, Lo-siRF took in as input single-nucleotide variant (SNV) data and cardiac MRI-derived left ventricular mass indexed by body surface area (LVMi) from 29,661 UK Biobank participants. **b**, Dimension reduction was performed via a genome-wide association study (GWAS) to concentrate the analysis on a smaller set of SNVs. **c**, LVMi was binarized into high and low LVMi categories according to three different binarization thresholds (represented by the stacked boxes). **d**, For each of the three binarization thresholds, a signed iterative random forest (siRF) was fitted using the GWAS-filtered SNVs to predict the binarized LVMi phenotype. Other popular prediction methods including polygenic risk scores, machine learning (ML), and deep learning (DL) models were also trained and evaluated as baseline comparison methods. The validation



prediction accuracy of siRF was shown to be on par or better than these baseline comparisons, prior to interpreting the model fit. **e**, SNVs used in the fitted signed iterative random forest were aggregated into genetic loci based on annotations using ANNOVAR<sup>90</sup>. Genetic loci and pairwise interactions between loci were finally ranked according to their importance across the three signed iterative random forest fits, as measured by our proposed stability-driven importance score. **f**, Lo-siRF-prioritized risk loci and epistatic interactions. (1) Loci stably prioritized by lo-siRF as epistasis participants are highlighted in green. (2) nIndSigSNVs, the number of independent significant SNVs that are stably prioritized by lo-siRF across the three different LVMi binarization thresholds (panel **c**). (3) nSNVs, the number of candidate SNVs extracted by FUMA<sup>44</sup> (v1.5.4) in strong LD ( $r^2 > 0.6$ ) with any of the lo-siRF-prioritized independent significant SNVs. (4) Lo-siRF *p*-value, the mean *p* value from lo-siRF, averaged across the three LVMi binarization thresholds. (5) Lo-siRF *p*-value (excl. hypertension), the mean *p* value from lo-siRF when excluding hypertensive individuals from the analysis, averaged across the three LVMi binarization thresholds. (6) Max CADD, the maximum CADD<sup>47</sup> score of SNVs within or in LD with the specific locus. A high CADD score indicates a strong deleterious effect of the variant. A threshold of 12.37 has been suggested by Kircher et al.<sup>47</sup>. (7) Min RDB, the minimum RegulomeDB<sup>46</sup> score of SNVs within or in LD with the specific locus. RDB is a categorical score to guide interpretation of regulatory variants (from 1a to 7, with 1a being the most biological evidence for an SNV to be a regulatory element)<sup>44,46</sup>. (8) The top-ranked SNV or SNV-SNV pair showing the highest occurrence frequency (Extended Data Fig. 4) averaged across lo-siRF fits from the three LVMi binarization thresholds. A full list of lo-siRF-prioritized SNVs and SNV-SNV pairs can be found in Extended Data 3. (8) Genomic location (hg38) and GWAS statistics information (using PLINK<sup>37</sup>) of the top SNV for each lo-siRF-prioritized locus. Abbreviations: MAF, minor allele frequency; NEA/EA, non-effect-allele/effect-allele; SE, standard error. (10) nPartnerSNVs, number of partner SNVs that interact with the given SNV in lo-siRF. These SNV-SNV pairs interacted in at least one lo-siRF decision path across every LVMi binarization threshold (details in Methods).

**Fig. 3: Lo-siRF finds epistatic interactions between genetic risk loci for left ventricular hypertrophy.**

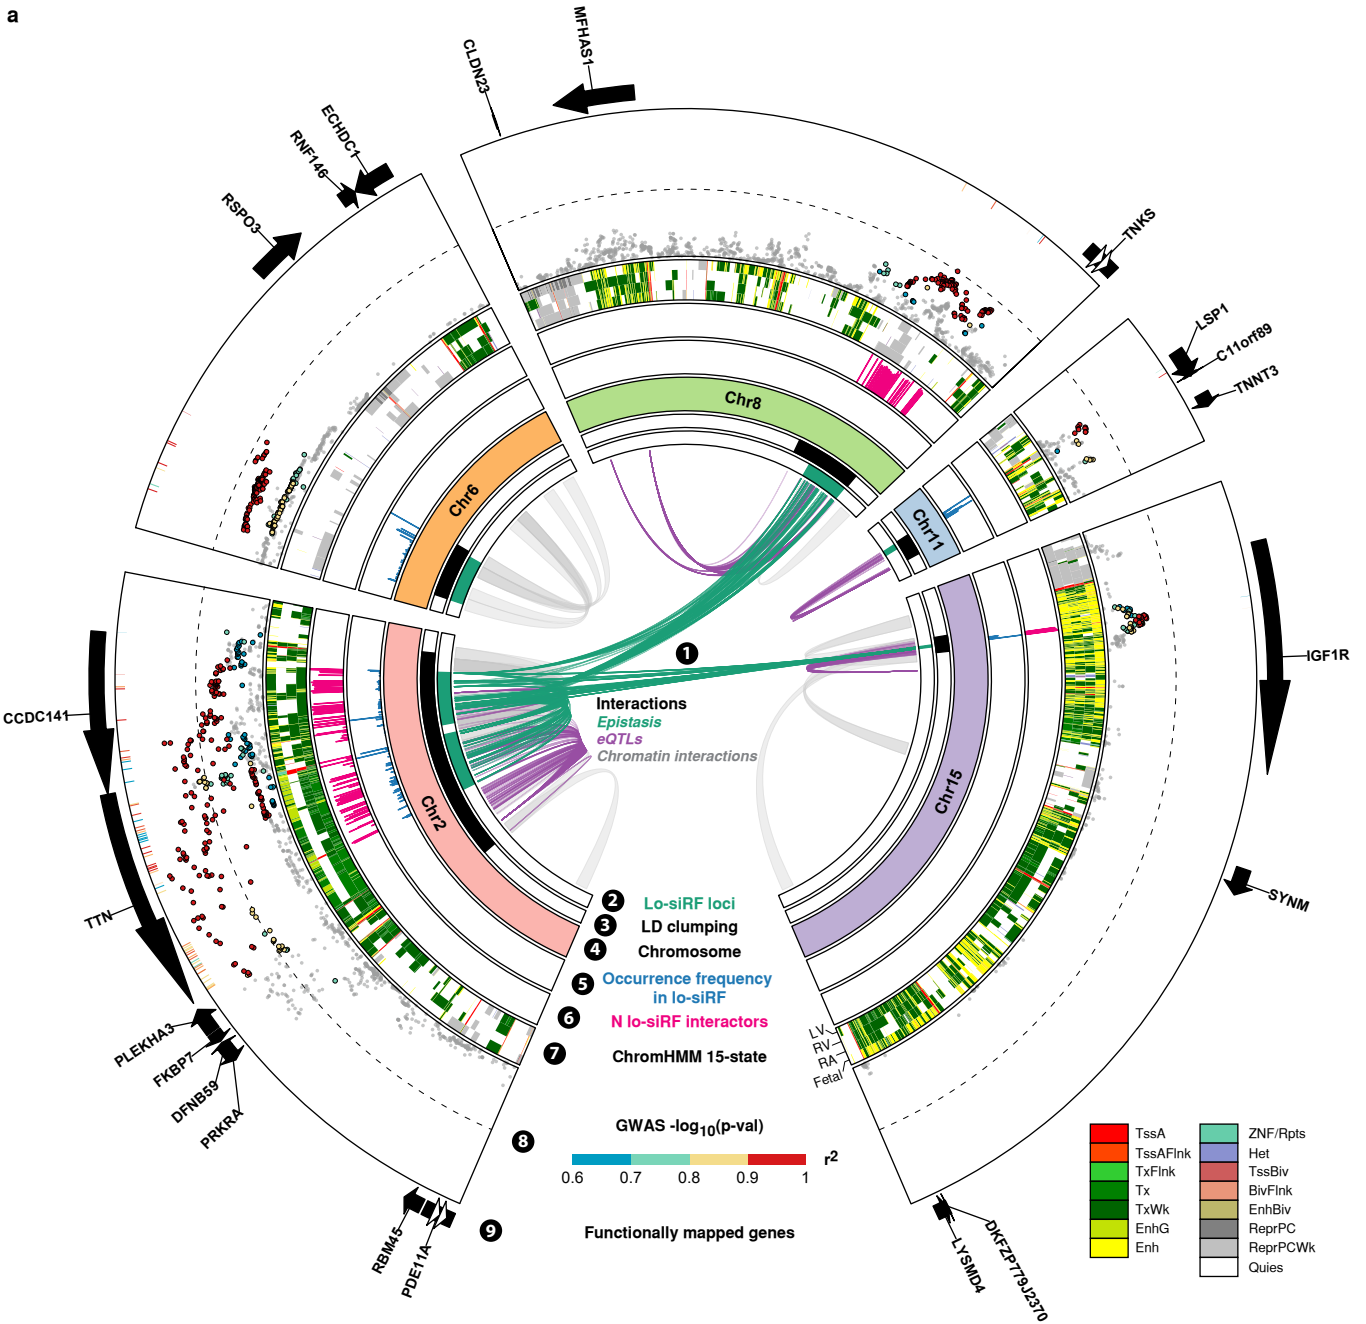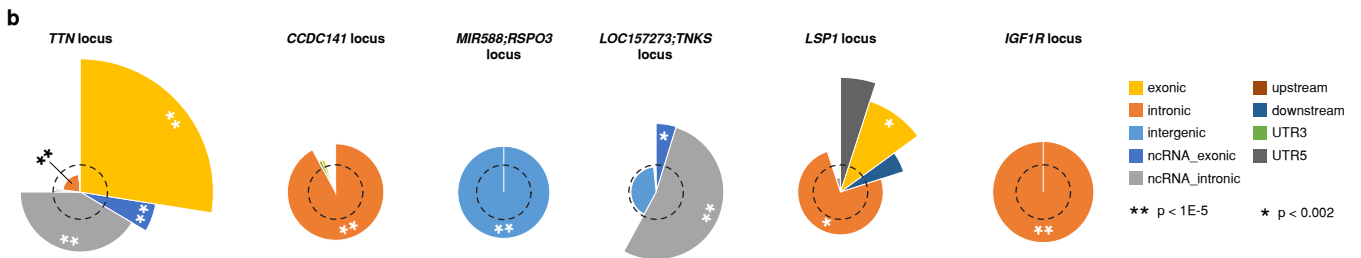

**a**, Circos plot showing the genetic risk loci identified by lo-siRF (green, circle 2) and regions after clumping FUMA-extracted SNVs in LD ( $r^2 > 0.6$ ) with lo-siRF-prioritized SNVs (black, circle 3). Circle 1 shows the top 300 epistatic SNV-SNV pairs with the highest frequency of occurrence in lo-siRF (green), SNV-gene linkages (FDR < 0.5) based on GTEx<sup>48</sup> V8 *cis*-eQTL information from heart and skeletal muscle tissues (purple), and 3D chromatin interactions<sup>44</sup> based on Hi-C data of left ventricular tissue obtained from GSE87112. Circle 5 and 6 show bar plots of the occurrence frequency and number of partner SNVs in epistasis (normalized by the maximum value of the corresponding locus) identified by lo-siRF, respectively. Circle 7 shows the ChromHMM<sup>45</sup> core-15 chromatin state for left ventricle (LV), right ventricle (RV), right atrium (RA), and fetal heart (Fetal). Circle 8 shows the GWAS Manhattan plot from PLINK<sup>37</sup> (circles) where only SNVs with  $p < 0.05$  are displayed. The 283 lo-siRF-prioritized SNPs and their LD-linked ( $r^2 > 0.6$ ) SNVs are color-coded as a function of their maximum  $r^2$  value. A portion of these LD-linked SNPs (the outer heatmap layer in circle 8) are extracted from the selected FUMA reference panel (thereby with no GWAS  $p$ -values). SNVs that are not in LD ( $r^2 \leq 0.6$ ) with any of the 283 lo-siRF-prioritized SNVs are gray. Dashed line indicates GWAS  $p = 5E-8$ . Circle 9 shows the 21 protein-coding genes mapped by FUMA. **b**, Pie charts showing ANNOVAR enrichment performed for each of the 6 lo-siRF loci (circle 2 in Fig. 3a and Fig. 2f). The arc length of each slice indicates the proportion of SNVs with a specific functional annotation. The radius of each slice indicates  $\log_2(E + 1)$ , where E is the enrichment score computed as (proportion of SNVs with an annotation for a given locus)/(proportion of SNVs with an annotation relative to all available SNVs in the FUMA reference panel). The dashed circle indicates E = 1 (no enrichment). Asterisks indicate two-sided  $p$ -values of Fisher's exact tests for the enrichment of each annotation. Details can be found in Extended Data 4 and 5.

**Fig. 4: Genes mapped from epistatic loci show strong correlations in multiple functional co-association networks.**

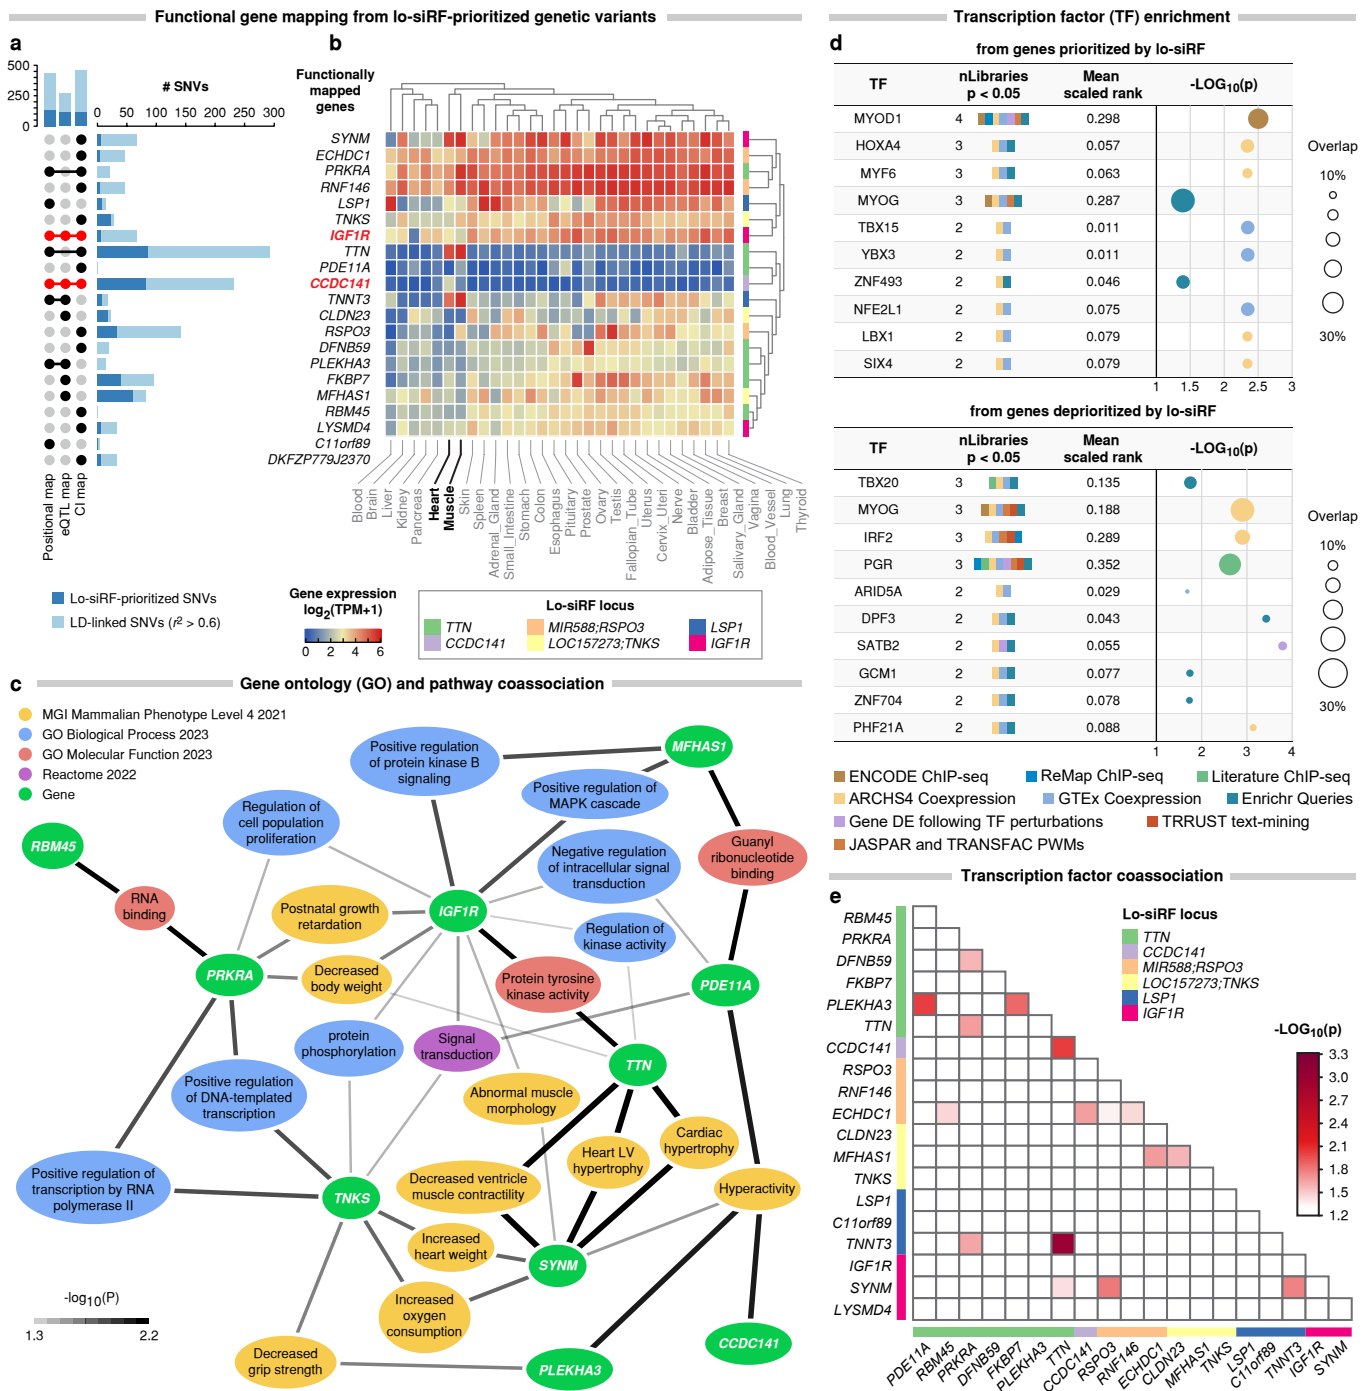

**a**, UpSet plot showing the number of lo-siRF-prioritized SNVs (dark blue) and their LD-linked ( $r^2 > 0.6$ ) SNVs (light blue, circle 8 in Fig. 3a) that are functionally mapped to each of the 21 protein-coding genes by positional, eQTL, and/or chromatin interaction (CI) mapping using FUMA<sup>44</sup>. *CCDC141* and *IGF1R* (highlighted in red) are prioritized by all the three types of SNV-to-gene mapping. Details can be found

in Extended Data 4. **b**, Heatmap of averaged expression (from GTEx) per tissue type per gene (50% winsorization,  $\log_2(\text{TPM} + 1)$ ) for these functionally mapped genes. **c**, Co-association network built from an enrichment analysis integrating multiple annotated gene set libraries for gene ontology (GO) and pathway terms from Enrichr<sup>55</sup>. The co-association network connects top enriched GO and pathway terms with genes (green nodes in the network) functionally linked from lo-siRF-prioritized epistatic and hypostatic loci (Fig. 2f). Strengths (indicated by the edge width in the network) of the co-association between enriched terms and genes were measured and ranked by the empirical  $p$ -value from an exhaustive permutation of the co-association score for all possible gene-gene combinations in the network (Details in Methods and Extended Data 6). **d**, A comparison between the top 10 transcription factors (TFs) enriched from genes prioritized (top) and deprioritized (bottom) by lo-siRF. The lo-siRF-prioritized genes are genes functionally linked from lo-siRF-prioritized SNVs (panel **a**). The lo-siRF-deprioritized genes are genes functionally linked from SNVs that failed to pass the lo-siRF prioritization thresholds. For each of the two gene groups, enrichment results against nine TF-annotated gene set libraries from ChEA3<sup>56</sup> and Enrichr<sup>55</sup> were integrated and ranked by the number of significantly (FET  $p < 0.05$ ) overlapped libraries (numbers in the *nLibraries* column) and the mean scaled rank across all libraries containing that TF (colored boxes in the *nLibraries* column). The balloon plot shows the lowest FET  $p$ -values for each TF (horizontal axis) and the proportion of overlapped genes (balloon size) between the input gene set and the corresponding TF-annotated gene set. **e**, Heatmap showing the TF co-association strength of gene-gene combinations among lo-siRF-prioritized genes relative to randomly selected gene pairs in the co-association network. More details are available in Extended Data Fig. 5 and Extended Data 7.

**Fig. 5: Network analysis using transcriptomic data from 313 human hearts indicates strong correlations between statistical epistasis contributors.**

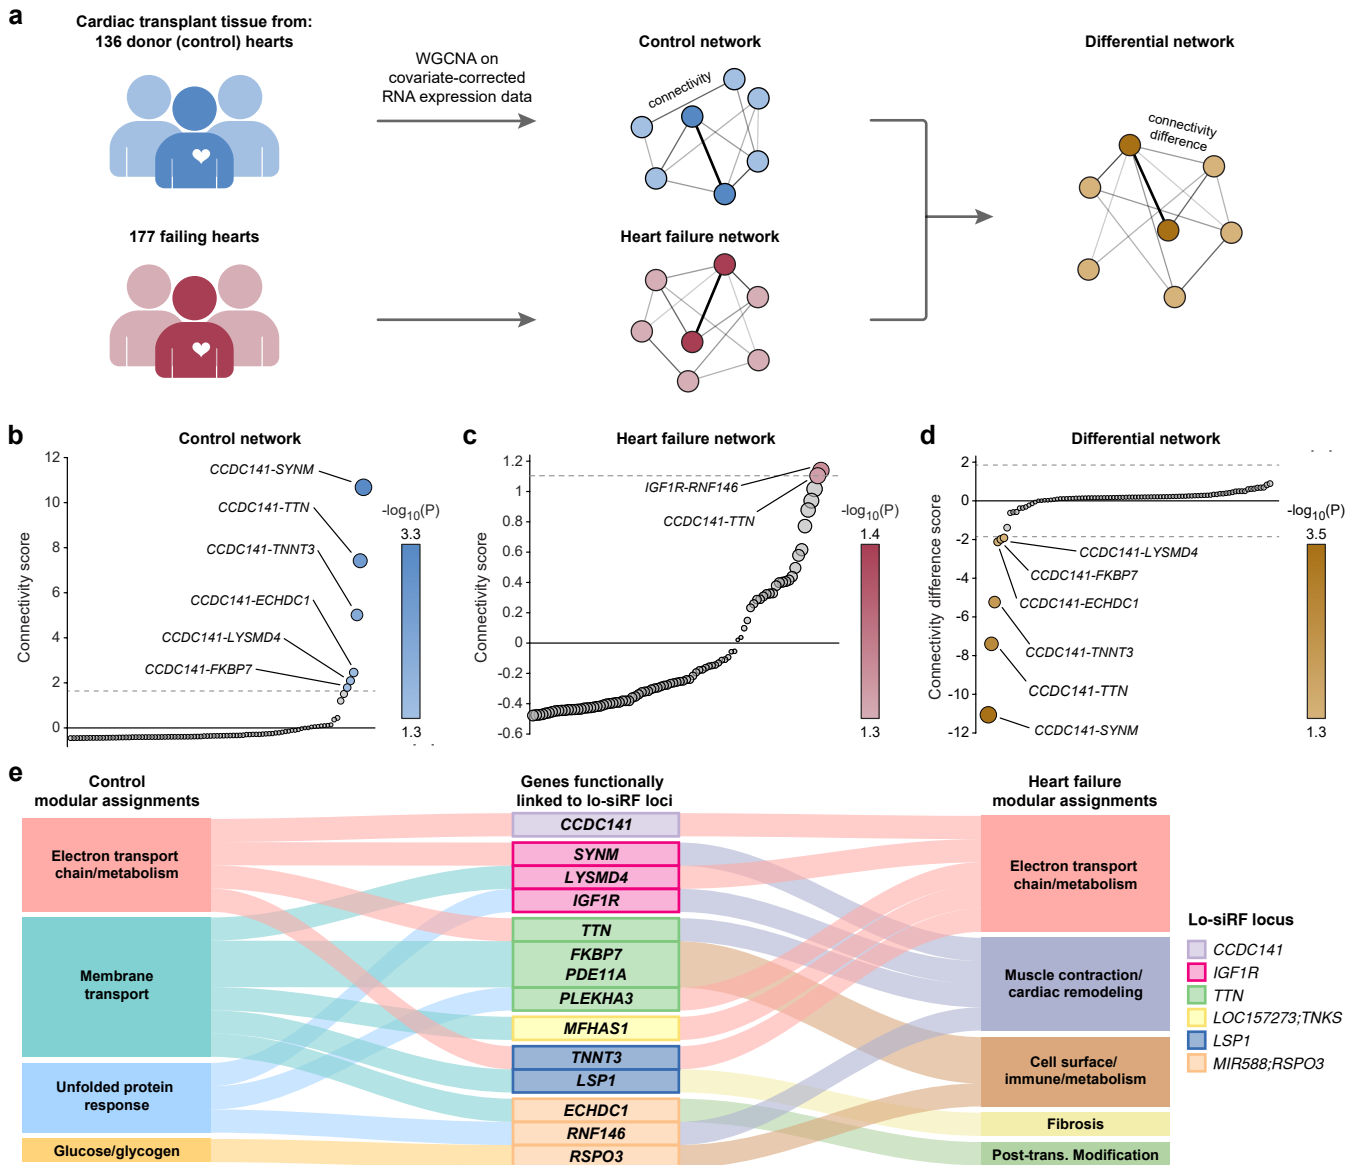

**a**, Control (blue) and heart failure (red) gene co-expression networks were established from a weighted gene co-expression network analysis (WGCNA) on transcriptomic data obtained from 313 non-failing and failing human heart tissues<sup>60</sup>. **b-c**, The connectivity between lo-siRF-prioritized genes in this study was compared against the full connectivity distributions for all possible gene-gene combinations in the control (**b**) and heart failure (**c**) networks. *CCDC141* showed a significant connectivity to *SYNM* and *LYSM4* (*IGF1R* lo-siRF locus) and *TTN* and *FKBP7* (*TTN* lo-siRF locus) in the control network. **d**, Comparing the difference between the control and heart failure networks indicate a significant decrease

in the in the connectivities of these gene pairs during the progression of failing hearts. **e**, A sanky plot demonstrating the rewired gene modular assignments for the lo-siRF loci-associated genes (middle column) in the control vs. heart failure networks. Names of the control (left column) and heart failure (right column) network modules were derived from KEGG and Reactome associations of genes within each module.

**Fig. 6: *CCDC141* non-additively interacts with *TTN* and *IGF1R* to modify cardiomyocyte morphology.**

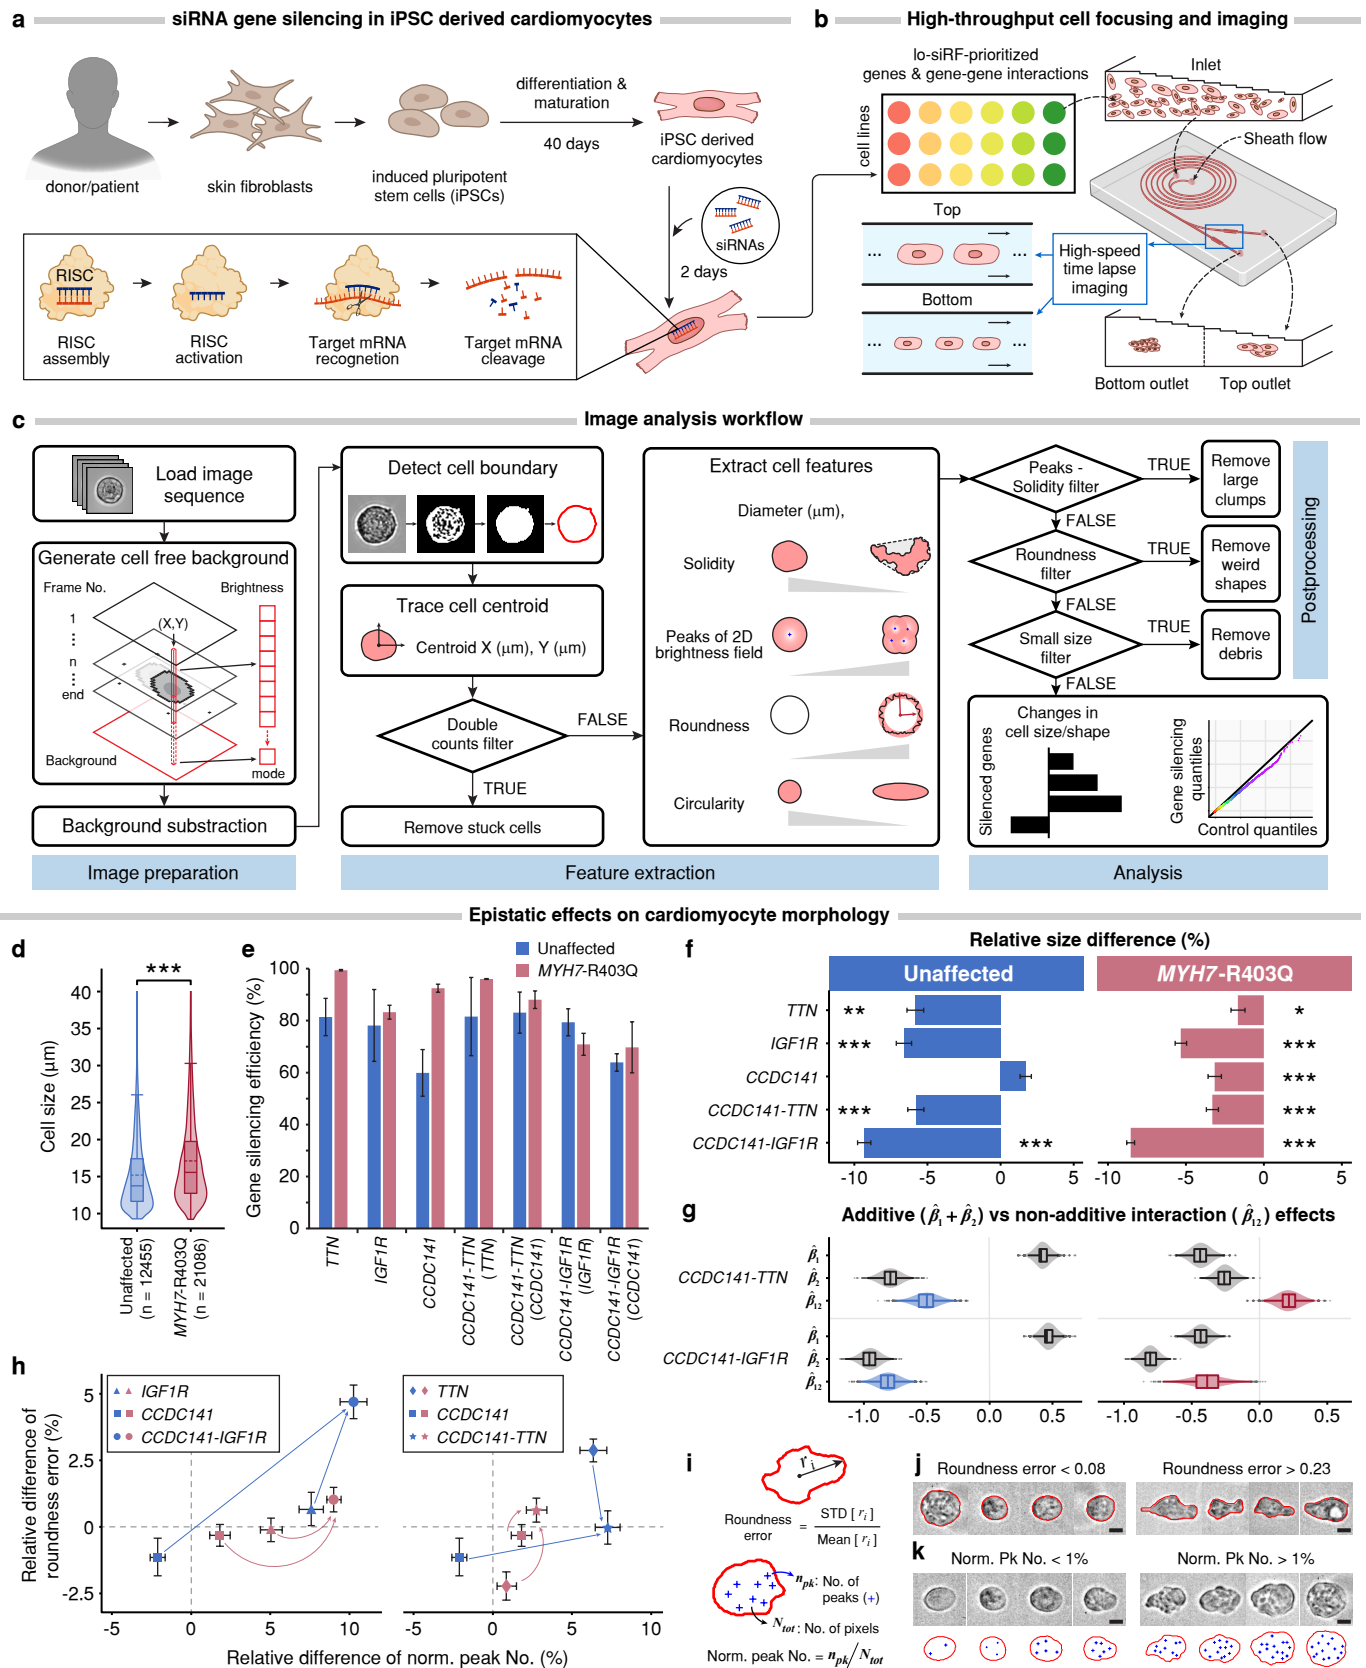



**a**, Human induced pluripotent stem cell (iPSC)-derived cardiomyocytes with and without hypertrophic cardiomyopathy (carrying an *MYH7*-R403Q mutation) were transfected with scramble siRNA or siRNAs specifically targeting single (*CCDC141*, *IGF1R*, and *TTN*) or combined (*CCDC141-IGF1R* and *CCDC141-TTN*) genetic loci prioritized by lo-siRF. **b**, Gene-silenced cardiomyocytes were bifurcated into two focused streams of large and small cells using a spiral microfluidic device (cell focusing mechanism illustrated in Extended Data Fig. 7) to allow high-resolution single-cell imaging. **c**, Workflow of the image analysis process. Time-lapse image sequences of single cells passing through the top and bottom microchannel outlets (panel **b**) were fed into a customized MATLAB-based program that extracts cell size/shape features via a sequential process of bright field background correction, cell boundary detection, cell tracking and stuck cell removal, cell feature extraction, data quality control and postprocessing, and morphological feature analysis. Extracted single cell features for each gene-silencing condition were compared with their scrambled control values to validate the potential role of epistasis in the genetic regulation of cardiomyocyte hypertrophy. **d**, Violin plots of cell diameters of unaffected (blue) and *MYH7*-R403Q variant (red) cardiomyocytes. Solid and dashed lines in box plots represent median and mean values, respectively. Asterisks indicate significant difference ( $***p < 1E-36$ , Wilcoxon signed rank test). **e**, Gene-silencing efficiency in unaffected (blue,  $n = 5$  to  $9$ ) and *MYH7*-R403Q variant (red,  $n = 3$ ) cells based on RT-qPCR analysis (details in Methods). Error bars indicate standard deviations. **f**, Percent change in median cell diameter (relative size difference) of gene-silenced cardiomyocytes relative to scrambled control values due to monogenic and digenic gene knockdown effects. Relative size differences were averaged across data from two to four independent batches of cells. Error bars indicate standard deviations computed on 1000 bootstrap samples of these batches with the following sample size:  $n = 13147$  (*TTN*),  $19460$  (*IGF1R*),  $45304$  (*CCDC141*),  $19979$  (*CCDC141-TTN*), and  $26135$  (*CCDC141-IGF1R*) for unaffected cells and  $n = 22134$  (*TTN*),  $33801$  (*IGF1R*),  $21158$  (*CCDC141*),  $39515$  (*CCDC141-TTN*), and  $52049$  (*CCDC141-IGF1R*) for *MYH7*-R403Q variant cells. Asterisks indicate significant difference between gene-silencing and scrambled control conditions based on the maximum  $p$ -values of Wilcoxon signed rank test across all batches of cells ( $*p < 0.05$ ,  $**p < 0.001$ , and  $***p < 1E-4$ ). **g**, Violin plots highlighting the magnitudes and directions of non-

additive interaction effects ( $\hat{\beta}_{12}$ ) for unaffected (blue) and *MYH7*-R403Q variant (red) cells and each gene pair compared to marginal effects ( $\hat{\beta}_1$  and  $\hat{\beta}_2$ , gray), estimated via a quantile regression model across 10,000 bootstrap samples (details in Methods). **h**, *CCDC141* non-additively interacts with *IGF1R* (left) and *TTN* (right) to modify boundary and texture features of unaffected (blue) and *MYH7*-R403Q variant (red) cells. Cell boundary waveness and texture irregularity were measured by the roundness error (**i**, top) and normalized peak number (**i**, bottom), respectively. **j**, Representative single-cell images overlapped with detected cell boundaries (red lines) show that a higher roundness error indicates increased irregularity of the cell boundary. **k**, Representative single-cell images with detected peaks (blue plus signs) of the brightfield intensity distribution enclosed within the cell boundaries (red lines) indicate a varying level of cell textural irregularity. Scale bars: 10  $\mu\text{m}$ . Detailed statistical information of cell morphology measurements and non-additivity analysis for the studied gene pairs can be found in Extended Data 8.

## Extended Data Figures

**Extended Data Fig. 1: Distribution of LVM and LVMi measurements for 29,661 UK Biobank participants.**

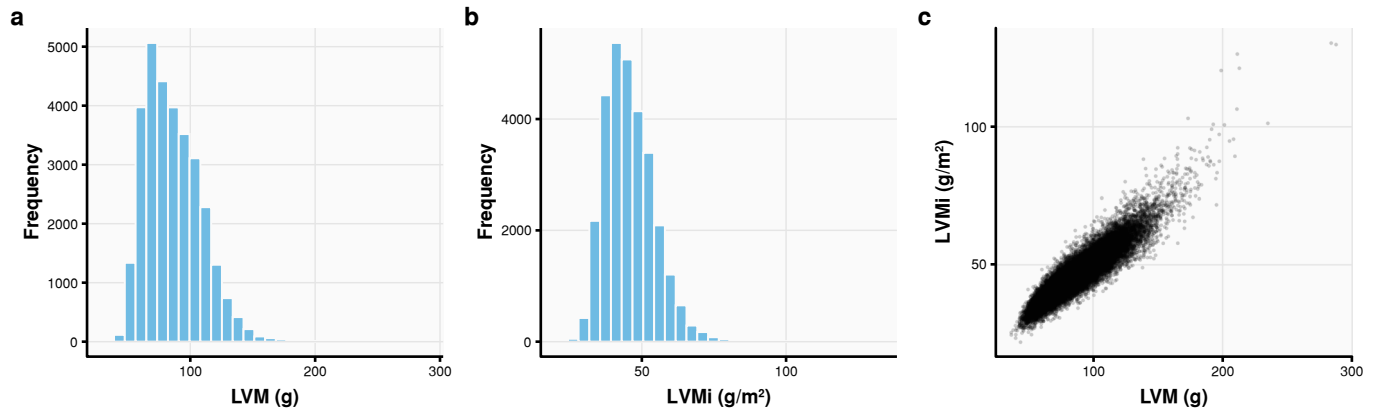

Left ventricular mass (LVM, **a**) and LVM indexed to body surface area (LVMi, **b**) measurements were extracted from cardiac magnetic resonance imaging for 29,661 unrelated White British individuals via deep learning<sup>28</sup>. **c**, A high Pearson correlation of 0.92 was observed between these LVM and LVMi measurements.

**Extended Data Fig. 2: LVMi GWAS using BOLT-LMM and PLINK.**

**a. LVMi GWAS: BOLT-LMM**

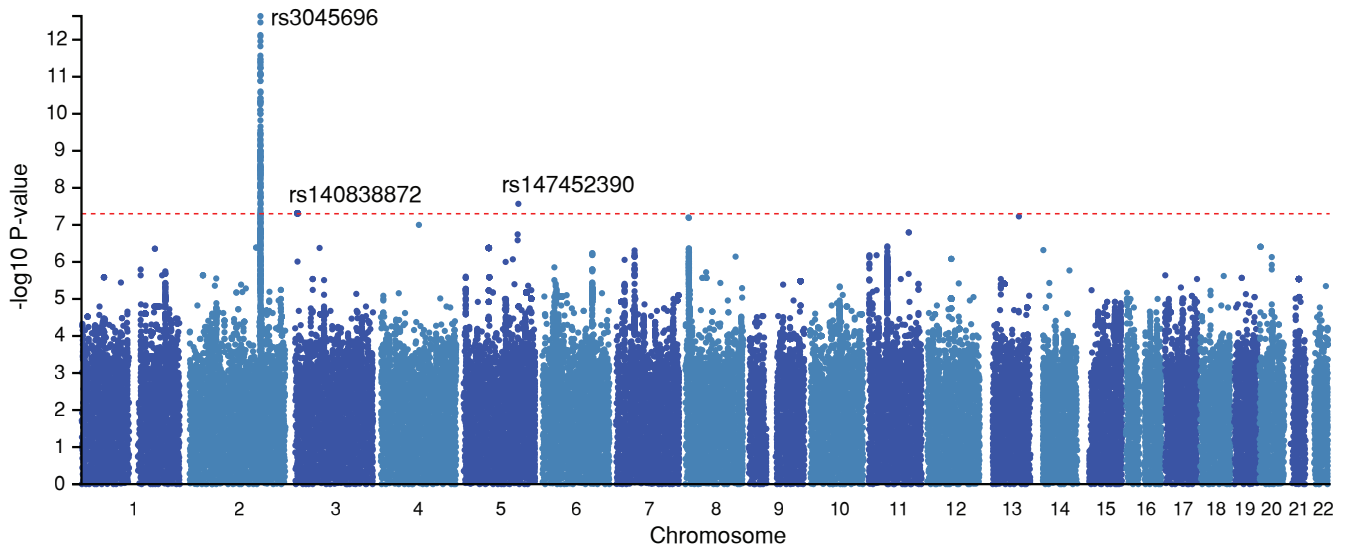

**b. LVMi GWAS: PLINK**

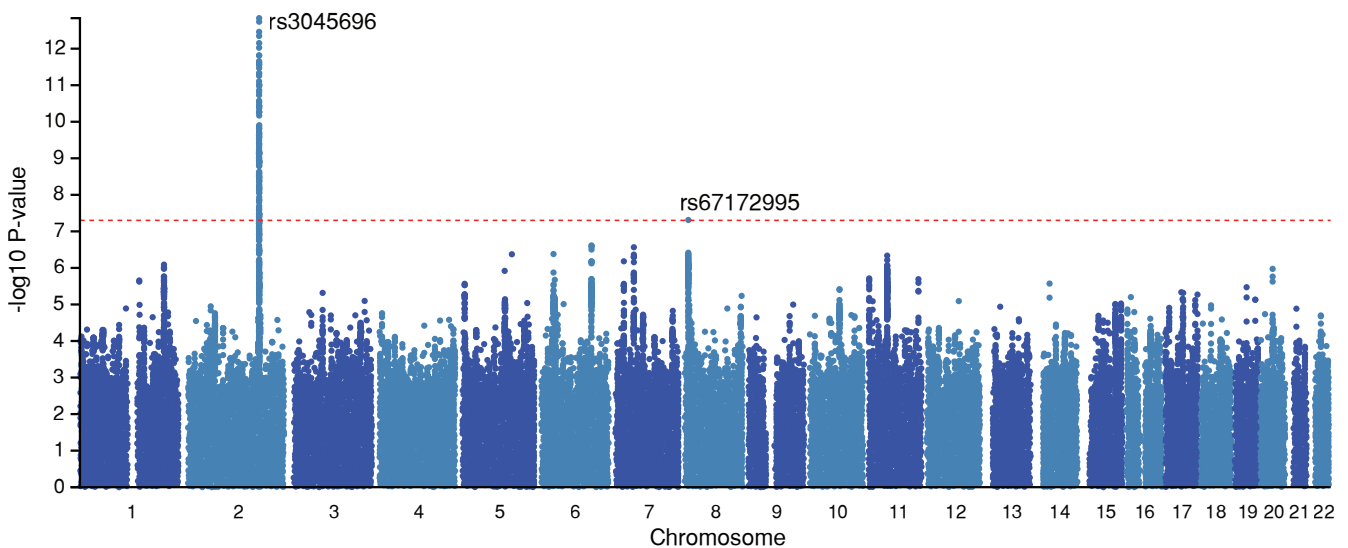

GWAS using BOLT-LMM (a) and PLINK (b) identified associations with LVMi, of which the lead SNP rs3045696 showed the highest significance. This SNP rs3045696 was also identified as the top lead SNP by both BOLT-LMM and PLINK while other lead SNVs (labeled) were significant in either the BOLT-LMM GWAS or the PLINK GWAS but not both. The red dashed line denotes the genome-wide significance threshold ( $p < 5E-8$ ). The two SNVs, rs3045696 and rs67172995, are also stably prioritized by lo-siRF as epistasis interactor variants. Details can be found in Extended Data 1.

**Extended Data Fig. 3: Differences in local stability scores between high and low LV mass highlight the importance of the lo-siRF-prioritized interactions between genetic loci.**

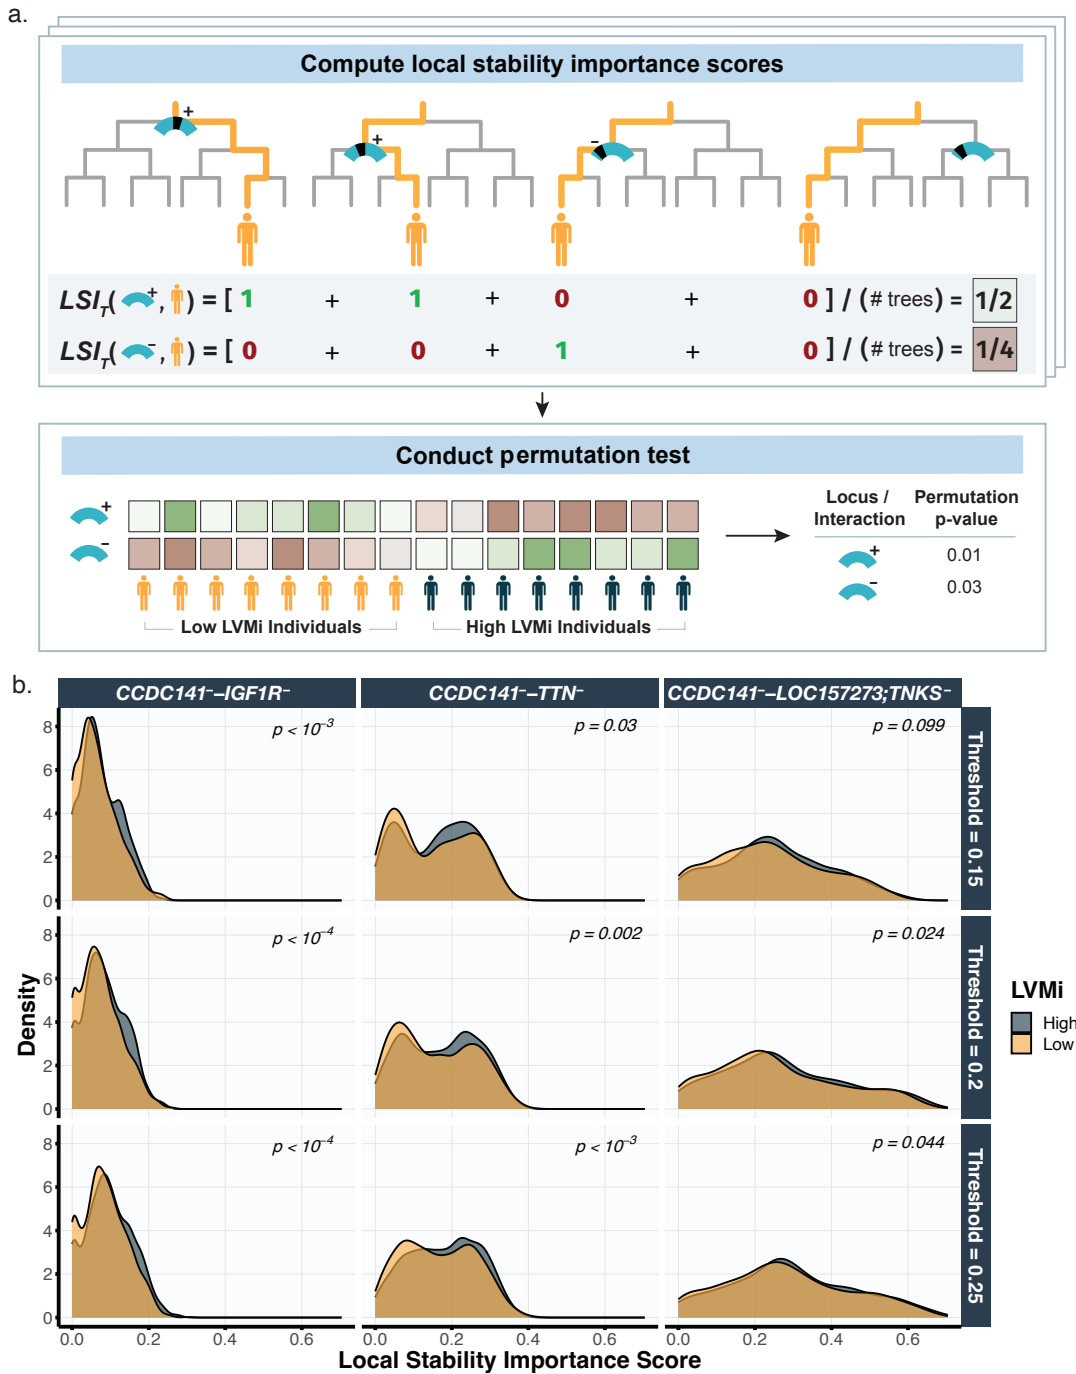

**a**, Schematic of local stability importance score computation. Given a locus (light blue transcript), the local stability importance score for an individual is defined as the proportion of trees for which at least one SNV (shaded black region) in the locus is used in the individual’s decision path. This computation (top) was performed for each individual (denoted by the stacked boxes). Then, a permutation test was

conducted to assess the difference in these local stability importance scores between the low and high LVMi individuals (bottom). **b**, Differences in the distribution of local stability importance scores suggest that the identified interactions between genetic loci are important for differentiating individuals with high (dark gray) and low (orange) LVMi in the siRF fit. This result, evaluated on the validation data, is stable across the three binarization thresholds and is quantified by a permutation  $p$ -value given in the top right corner of each subplot.

**Extended Data Fig. 4: Top SNVs from lo-siRF-prioritized loci and interactions between loci.**

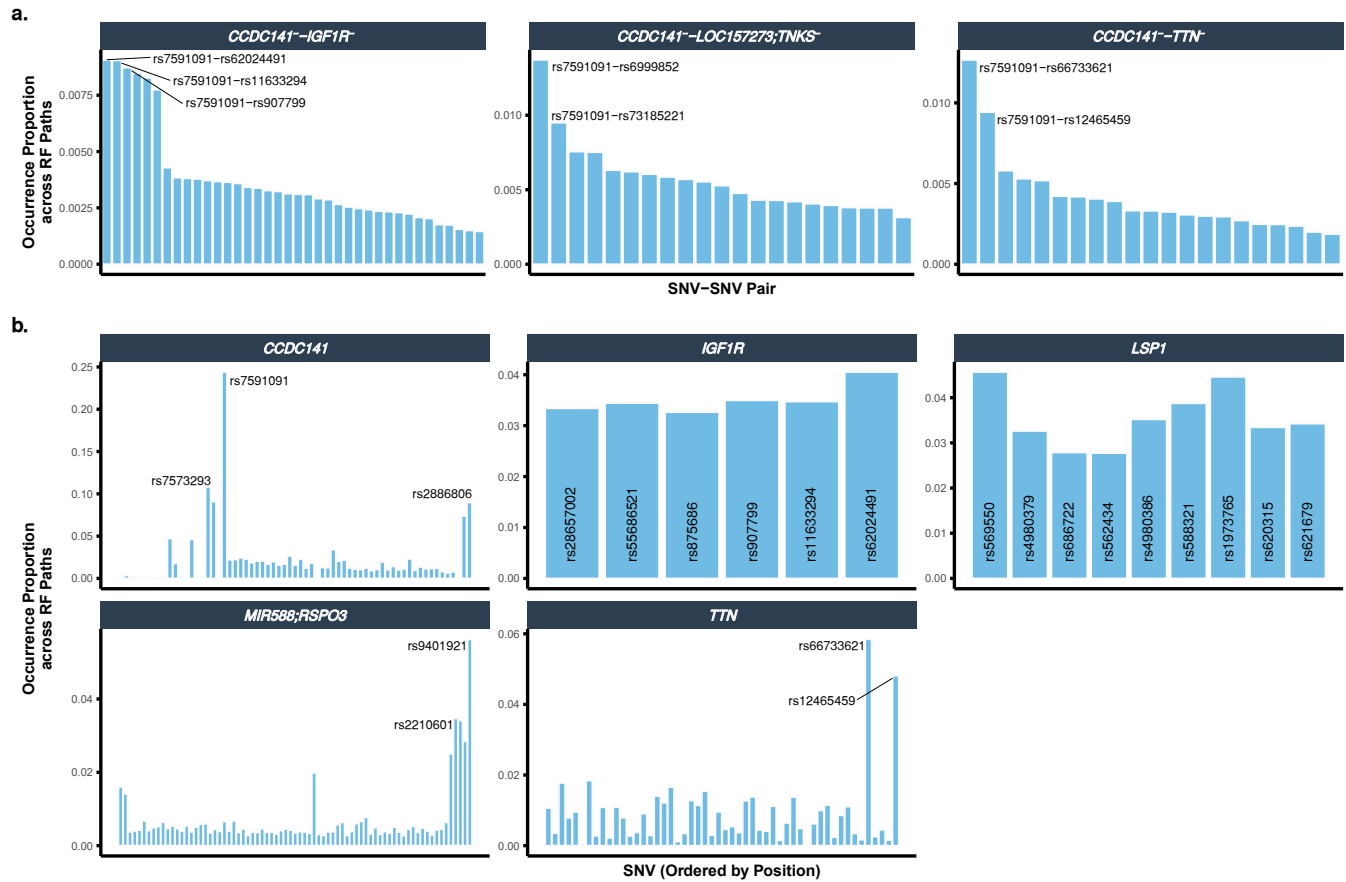

The most important SNVs and SNV-SNV pairs, as measured by their proportion of occurrence in the siRF fit are annotated for the top lo-siRF-prioritized interactions between loci in **a** and top genetic loci in **b**. The y-axis shows the proportion of decision paths in siRF, for which the SNV or SNV-SNV pair occurs, averaged across all three binarization thresholds. In each of the interactions between genetic loci, the SNV rs7591091 in the *CCDC141* locus appears most frequently, suggesting a key role in cardiac hypertrophy.

**Extended Data Fig. 5: Genes mapped from epistatic loci share transcription factors and splicing regulators.**

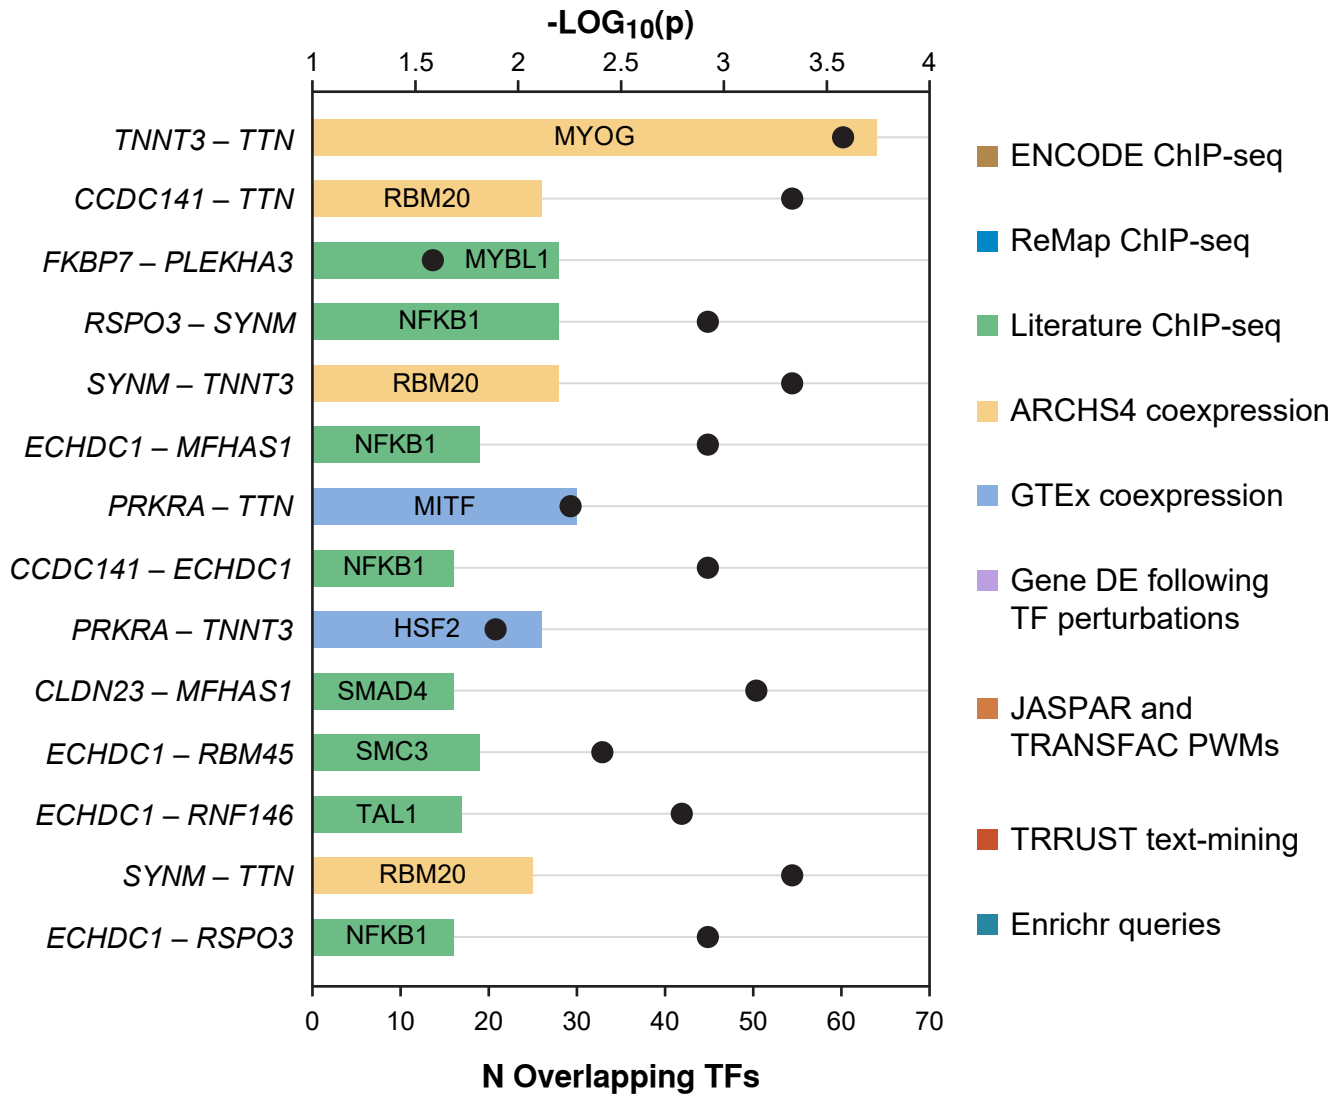

For the gene pairs exhibiting a strong co-association to transcription factors (TFs) and RNA-binding regulators ( $p < 0.05$ , Fig. 4e), the horizontal bars indicate the number of shared TFs or RNA-binding regulators (bottom axis), of which the top-ranked one with the lowest enrichment  $p$ -value (dots, top axis) are labeled on the bars, which are colored by the corresponding gene set library. Detailed information can be found in Extended Data 7.



**Extended Data Fig. 6: Dendrograms from WGCNA network analyses**

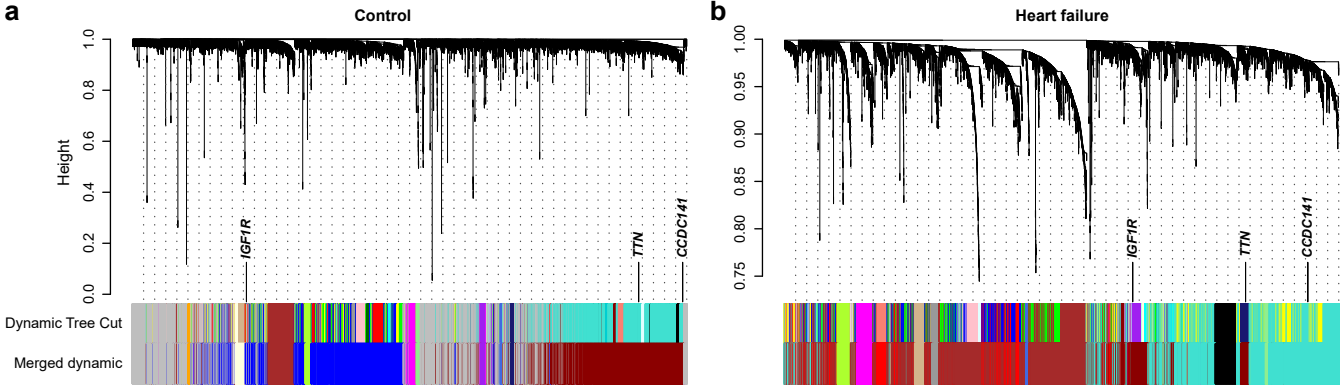

Dendrograms from WGCNA control (a) and heart failure (b) networks show distinctive gene module structures and modular assignments for *CCDC141*, *IGF1R*, and *TTN*.

**Extended Data Fig. 7: Spiral-shaped inertial microfluidic channel for cell focusing and imaging.**

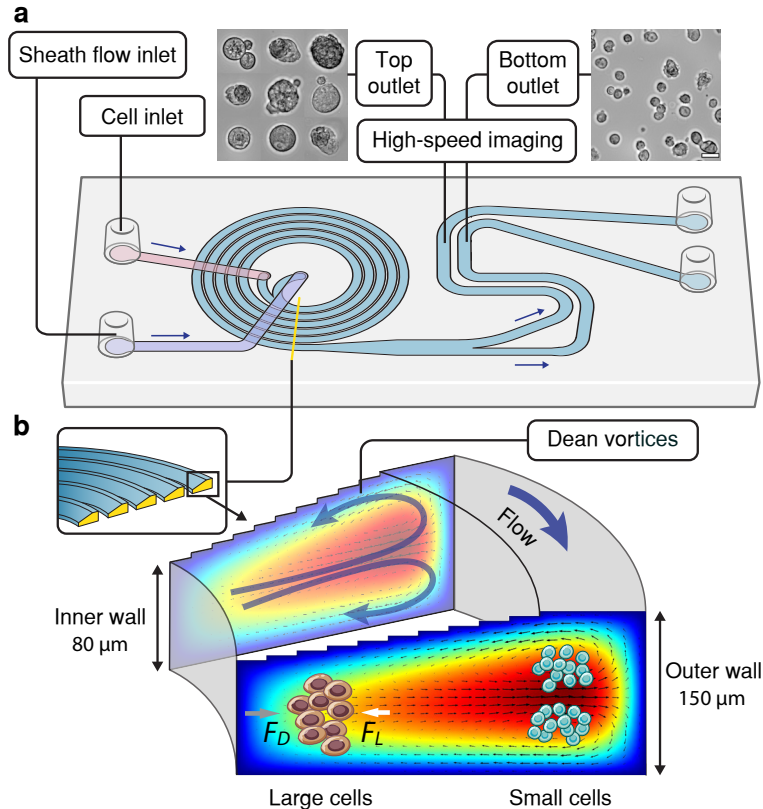

**a**, Schematic of an inertial microfluidic cell focusing device. Cell suspensions and fresh medium were introduced into the microfluidic device through the cell and sheath flow inlets, respectively, using a syringe pump and flowed down the 5-loop spiral microchannel with the same flow rate (1.2 mL/min). Inserted microscopy images show that randomly dispersed cells were separated by size and bifurcated into the top (large cells) or bottom (small cells) outlets. Scale bar, 10 μm. Outlet channels are connected to straight observation channels where flowing cells were further focused in the channel height direction and imaged using a high-speed camera for morphological feature extraction (Fig. 6c).

**b**, Schematic of the cell focusing principle. The spiral microchannel has a cross-section with a slanted ceiling, resulting in different depths at the inner and outer side of the microchannel. This geometry induces strong Dean vortices (counter rotating vortices in the plane perpendicular to the main flow direction) in the outer half of the microchannel cross-section. The interplay between drag forces ( $F_D$ ) induced by Dean vortices and lift forces ( $F_L$ ) due to shear gradient and the channel wall drives cell transverse migration towards equilibrium positions where the net force is zero. As a result, large cells in

a heterogeneous population progressively migrate closer to the inner channel wall, while smaller cells move towards the outer channel wall. Details about microchannel dimensions can be found in Methods.

**Extended Data Fig. 8: Epistatic genes non-uniformly reshape cardiomyocyte size distributions.**

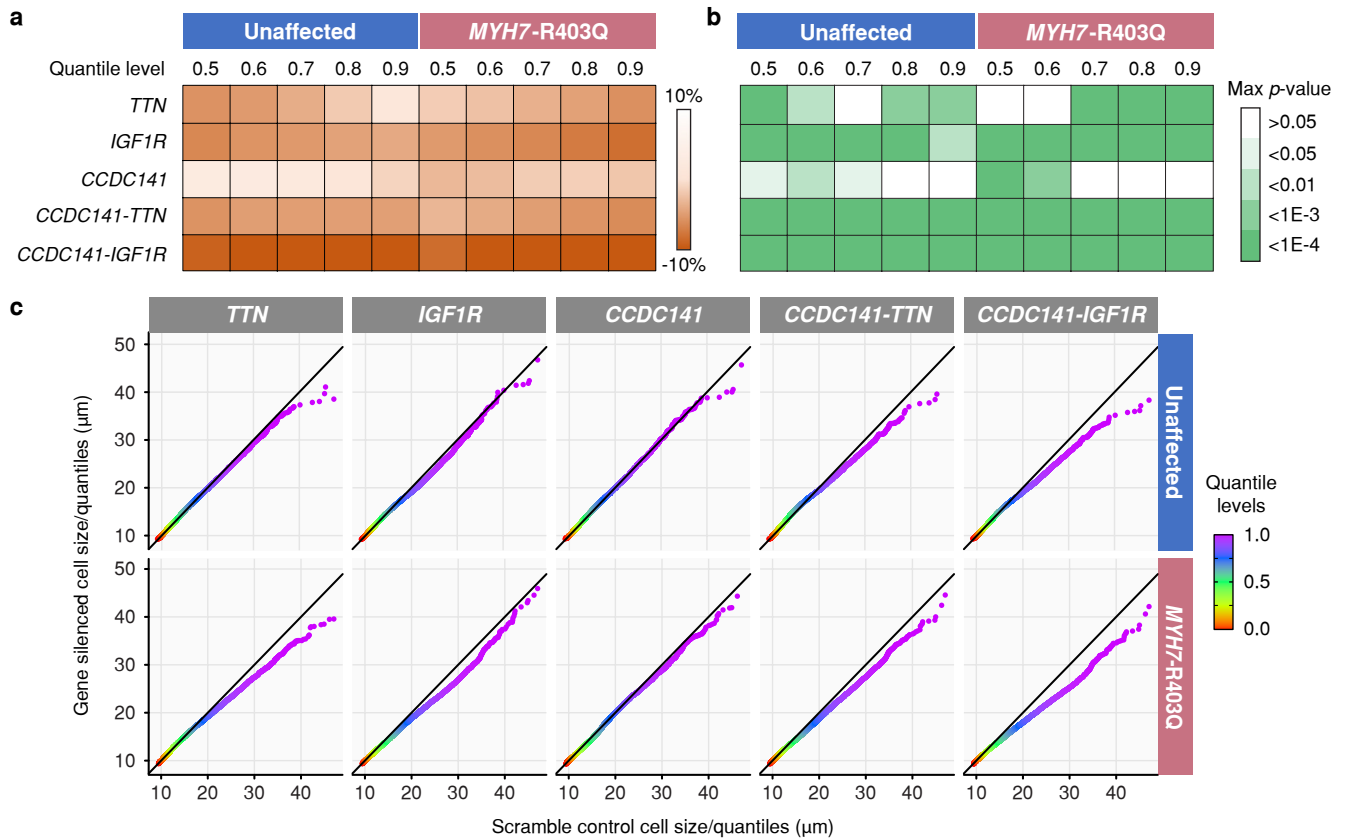

**a**, A heatmap of relative differences of cell sizes at various quantile levels between gene-silencing and scramble control conditions for unaffected and *MYH7-R403Q* variant cardiomyocytes. Larger quantiles correspond to larger cells in the cell size distribution. Dark red indicates strong reduction of cell sizes at the specified quantile level in gene-silenced cells relative to the scramble control. The corresponding statistical differences (**b**) were evaluated by the maximum *p*-values across all batches of cells using a bootstrap quantile test (with 10,000 bootstrapped samples). **c**, Representative QQ-plots of cell size quantiles comparing between gene-silenced cells and scramble controls for both unaffected (top row) and *MYH7-R403Q* variant (bottom row) cardiomyocytes indicate a clear size-bias in the effect of silencing *CCDC141-IGF1R* on correcting cardiomyocyte hypertrophy.

**Extended Data Fig. 9: Effects of lo-siRF-prioritized genes and gene-gene interactions on hypertrophic and non-hypertrophic cell morphology.**

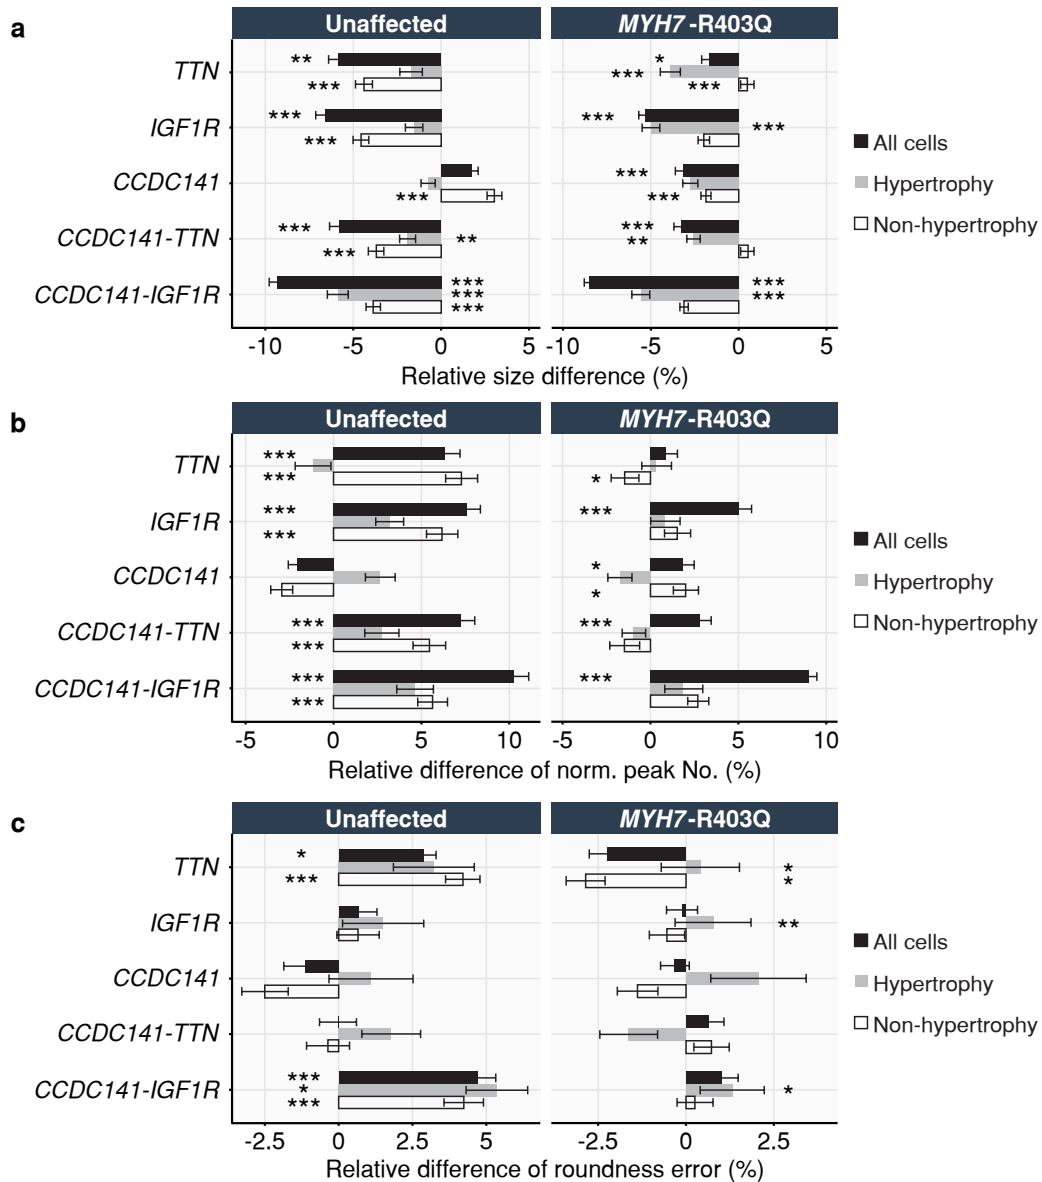

Relative differences in median cell size (**a**), normalized peak number (**b**), and roundness error (**c**) analyzed for cells size-sorted into the top (hypertrophic cells, gray bars) and bottom (non-hypertrophic cells, white bars) microchannel outlets (Extended Data Fig. 7) separately, as well as for both large and small cells (black bars). For both unaffected and diseased human induced pluripotent stem cell-derived cardiomyocytes, bars represent the relative differences calculated by  $(m_s - m_c)/m_c \times 100\%$ , where  $m_s$  and  $m_c$  denote measurements from each gene-silencing condition and the scrambled control condition, respectively. Error bars indicate standard deviation calculated from bootstrapping samples of 2 to 4

batches of cells. Asterisks indicate significant differences compared to the scramble control based on the maximum  $p$ -values of Wilcoxon signed rank test across all batches of cells (\* $p < 0.05$ , \*\* $p < 0.001$ , and \*\*\* $p < 1E-4$ ).

## Supplementary Tables

**Supplementary Table 1: Characteristics of 29,661 analyzed participants in the UK Biobank.**

|                           | Female      | Male         |
|---------------------------|-------------|--------------|
| N                         | 15189       | 14472        |
| LVMi (g/m <sup>2</sup> )  | 40.7 (5.7)  | 51.3 (7.8)   |
| LVM (g)                   | 70.7 (12.3) | 102.7 (18.6) |
| Age (y)                   | 63.4 (7.5)  | 64.9 (7.7)   |
| Height (cm)               | 162.9 (6.2) | 176.2 (6.6)  |
| Weight (kg)               | 69.0 (13.0) | 83.7 (13.3)  |
| Hypertensive Diseases     | 20.1%       | 29.8%        |
| Aortic Stenosis           | 0.1%        | 0.2%         |
| Heart Failure             | 0.1%        | 0.6%         |
| Type II Diabetes          | 1.6%        | 3.2%         |
| Blood Pressure Medication | 12.1%       | 20.0%        |

Summary statistics of the 29,661 unrelated White British individuals analyzed in this study. Means and standard deviations (in parentheses) are reported for continuous measurements (LVMi, LVM, age, height, and weight) alongside the number of individuals (N) and the percentage of individuals with various cardiac hypertrophy-related diseases or on blood pressure medication. We define hypertensive individuals as anyone with self-reported hypertension, high blood pressure as diagnosed by a doctor, or any ICD10 billing code diagnosis in I10-I16; aortic stenosis as self-reported aortic stenosis or an ICD10 billing code diagnosis of I35; heart failure as self-reported heart failure or an ICD10 billing code diagnosis of I50; and type II diabetes as self-reported type II diabetes or an ICD10 billing code diagnosis of E11.

**Supplementary Table 2: Thresholds defining low and high LVMI groups used in siRF fit**

| <b>Binarization<br/>Threshold</b> | <b>Male</b>                   |                                | <b>Female</b>                 |                                |
|-----------------------------------|-------------------------------|--------------------------------|-------------------------------|--------------------------------|
|                                   | <b>Low LVMI<br/>Threshold</b> | <b>High LVMI<br/>Threshold</b> | <b>Low LVMI<br/>Threshold</b> | <b>High LVMI<br/>Threshold</b> |
| 0.15                              | 43.8                          | 58.5                           | 35.1                          | 46.1                           |
| 0.20                              | 45.1                          | 56.8                           | 36.0                          | 44.9                           |
| 0.25                              | 46.0                          | 55.4                           | 36.8                          | 43.8                           |

For each of the three binarization thresholds used in lo-siRF (corresponding to the bottom/top 15<sup>th</sup>, 20<sup>th</sup>, and 25<sup>th</sup> quantiles), we provide the sex-specific LVMI cutoffs for the low and high LVMI groups. All thresholds were measured in g/m<sup>2</sup>.



**Supplementary Table 3: Prediction accuracies of methods for predicting the continuous LVMi phenotype without binarization**

| Method       | R-squared | RMSE | MAE  |
|--------------|-----------|------|------|
| RF           | -0.00476  | 8.54 | 6.77 |
| siRF         | -0.0101   | 8.57 | 6.80 |
| Ridge        | -0.0266   | 8.64 | 6.81 |
| Lasso        | -0.0409   | 8.70 | 6.86 |
| Kernel Ridge | -0.0457   | 8.72 | 6.85 |

Common machine learning methods yield validation  $R^2$  values that are slightly less than 0 for predicting the continuous LVMi phenotype without binarization. These prediction models are no better than constantly predicting the mean LVMi (which would yield an  $R^2$  value of 0) and thus do not pass the prediction check under the PCS framework. This motivates the need for an alternative approach, such as binarization. Abbreviations: RMSE, root mean squared error; MAE, mean absolute error.

**Supplementary Table 4: Prediction accuracies of methods across different LVMi binarization thresholds.**

| Method                | Binarization Threshold = 0.15 |              |              | Binarization Threshold = 0.20 |              |              | Binarization Threshold = 0.25 |              |              |
|-----------------------|-------------------------------|--------------|--------------|-------------------------------|--------------|--------------|-------------------------------|--------------|--------------|
|                       | Accuracy                      | AUROC        | AUPRC        | Accuracy                      | AUROC        | AUPRC        | Accuracy                      | AUROC        | AUPRC        |
| siRF                  | 0.554                         | <b>0.585</b> | <b>0.579</b> | <b>0.557</b>                  | <b>0.583</b> | <b>0.562</b> | <b>0.563</b>                  | <b>0.582</b> | <b>0.556</b> |
| RF                    | 0.546                         | 0.572        | 0.571        | 0.553                         | 0.569        | 0.549        | 0.554                         | 0.569        | 0.555        |
| Lasso                 | 0.547                         | 0.559        | 0.541        | 0.545                         | 0.556        | 0.529        | 0.534                         | 0.550        | 0.526        |
| Ridge                 | <b>0.559</b>                  | 0.567        | 0.550        | 0.539                         | 0.563        | 0.539        | 0.541                         | 0.555        | 0.536        |
| SVM                   | 0.553                         | 0.566        | 0.552        | 0.551                         | 0.565        | 0.541        | 0.544                         | 0.558        | 0.541        |
| Multilayer Perceptron | 0.530                         | 0.534        | 0.531        | 0.552                         | 0.554        | 0.526        | 0.536                         | 0.544        | 0.535        |
| Autogluon (medium)    | 0.553                         | 0.575        | 0.556        | 0.552                         | 0.566        | 0.547        | 0.552                         | 0.562        | 0.537        |
| Autogluon (good)      | 0.544                         | 0.560        | 0.541        | 0.548                         | 0.559        | 0.537        | 0.544                         | 0.557        | 0.529        |
| Polygenic Risk Score  | 0.513                         | 0.525        | 0.526        | 0.520                         | 0.537        | 0.516        | 0.515                         | 0.536        | 0.520        |

Maximum prediction accuracies highlighted in bold. The siRF model performs better or on par with other commonly used machine learning methods when predicting the binarized LVMi phenotype. This result holds across all three binarization thresholds and three different classification metrics, i.e., classification accuracy, area under the receiver operator curve (AUROC), and area under the precision-recall curve (AUPRC). In accordance with the prediction check component of the PCS framework, siRF is an appropriate fit for the given data.

**Supplementary Table 5: Top signed loci and interactions between loci, prioritized by lo-siRF across LVMi binarization thresholds.**

| Loci / Interaction                                    | Binarization Threshold |                    |                    | Mean p-value       |
|-------------------------------------------------------|------------------------|--------------------|--------------------|--------------------|
|                                                       | 0.15                   | 0.20               | 0.25               |                    |
| <i>CCDC141<sup>-</sup>-IGF1<sup>-</sup></i>           | < 10 <sup>-3</sup>     | < 10 <sup>-4</sup> | < 10 <sup>-4</sup> | < 10 <sup>-3</sup> |
| <i>IGF1<sup>-</sup></i>                               | < 10 <sup>-3</sup>     | < 10 <sup>-3</sup> | < 10 <sup>-3</sup> | < 10 <sup>-3</sup> |
| <i>MIR588;RSPO3<sup>+</sup></i>                       | 0.002                  | 0.004              | < 10 <sup>-4</sup> | 0.002              |
| <i>TTN<sup>-</sup></i>                                | 0.022                  | 0.006              | < 10 <sup>-3</sup> | 0.009              |
| <i>CCDC141<sup>-</sup>-TTN<sup>-</sup></i>            | 0.030                  | 0.002              | < 10 <sup>-3</sup> | 0.011              |
| <i>TTN<sup>+</sup></i>                                | 0.030                  | 0.005              | < 10 <sup>-3</sup> | 0.012              |
| <i>MIR588;RSPO3<sup>-</sup></i>                       | 0.016                  | 0.014              | 0.009              | 0.013              |
| <i>LSP1<sup>-</sup></i>                               | 0.029                  | 0.019              | 0.002              | 0.017              |
| <i>CCDC141<sup>-</sup></i>                            | 0.033                  | 0.007              | 0.015              | 0.018              |
| <i>CCDC141<sup>-</sup>-LOC157273;TNKS<sup>-</sup></i> | 0.099                  | 0.024              | 0.044              | 0.056              |

A list of the top signed loci and interactions between loci, prioritized by lo-siRF, that were stably important across all three LVMi binarization thresholds (Supplementary Table 2). These loci and interactions between loci are ranked by the lo-siRF *p*-value, averaged across the three binarization thresholds.

**Supplementary Table 6: Summary of siRF evaluation metrics for top interactions between loci.**

| Threshold                                                    | Prevalence | Precision | Class Difference in Prevalence | Stability of Class Difference in Prevalence | Feature Selection Dependence | Stability of Feature Selection Dependence | Increase in Precision | Stability of Increase in Precision | Stability |
|--------------------------------------------------------------|------------|-----------|--------------------------------|---------------------------------------------|------------------------------|-------------------------------------------|-----------------------|------------------------------------|-----------|
| <b><i>CCDC141<sup>-</sup>-IGF1R<sup>-</sup></i></b>          |            |           |                                |                                             |                              |                                           |                       |                                    |           |
| Binarization Threshold = 0.15                                | 0.064      | 0.56      | 0.012                          | 1.0                                         | 0.00094                      | 0.78                                      | 0.017                 | 1.0                                | 0.68      |
| Binarization Threshold = 0.2                                 | 0.062      | 0.54      | 0.0095                         | 1.0                                         | 0.0044                       | 1.0                                       | 0.014                 | 1.0                                | 0.64      |
| Binarization Threshold = 0.25                                | 0.077      | 0.54      | 0.012                          | 1.0                                         | 0.011                        | 1.0                                       | 0.019                 | 1.0                                | 0.82      |
| <b><i>CCDC141<sup>-</sup>-LOC157273;TNKS<sup>-</sup></i></b> |            |           |                                |                                             |                              |                                           |                       |                                    |           |
| Binarization Threshold = 0.15                                | 0.20       | 0.56      | 0.040                          | 1.0                                         | 0.012                        | 1.0                                       | 0.020                 | 1.0                                | 1.0       |
| Binarization Threshold = 0.2                                 | 0.19       | 0.56      | 0.037                          | 1.0                                         | 0.020                        | 1.0                                       | 0.028                 | 1.0                                | 1.0       |
| Binarization Threshold = 0.25                                | 0.23       | 0.55      | 0.043                          | 1.0                                         | 0.0068                       | 1.0                                       | 0.022                 | 1.0                                | 1.0       |
| <b><i>CCDC141<sup>-</sup>-TTN<sup>-</sup></i></b>            |            |           |                                |                                             |                              |                                           |                       |                                    |           |
| Binarization Threshold = 0.15                                | 0.12       | 0.56      | 0.023                          | 1.0                                         | 0.0066                       | 1.0                                       | 0.016                 | 1.0                                | 1.0       |
| Binarization Threshold = 0.2                                 | 0.14       | 0.55      | 0.024                          | 1.0                                         | 0.0042                       | 0.96                                      | 0.017                 | 1.0                                | 1.0       |
| Binarization Threshold = 0.25                                | 0.085      | 0.52      | 0.0076                         | 1.0                                         | -0.0036                      | 0.020                                     | 0.0024                | 0.88                               | 0.92      |

Though prediction accuracy is weak (indicated by precision scores close to 0.5), the lo-siRF-prioritized interactions are stable across binarization thresholds and across bootstrap replicates (indicated by all types of stability scores being close or equal to 1). Here, prevalence measures the proportion of high LVMi individuals for which the interaction appears. Precision measures the probability of having high LVMi given that the interaction is active. The class difference in prevalence is the prevalence of the interaction in high LVMi individuals minus the prevalence in low LVMi individuals. Feature selection dependence evaluates whether the interaction is collectively or individually associated with the responses. The stability of each of these metrics evaluates how stable the respective scores are across 50 bootstrap replicates. The overall stability score (last column) is the proportion of times that the interaction is identified by siRF across 50 bootstrapped replicates. Higher scores for each listed metric indicate greater importance.

## Data availability

All genotype and cardiac MRI data used as input to the lo-siRF pipeline are available from the UK Biobank (<https://www.ukbiobank.ac.uk/>). This work was conducted under the UK Biobank application 22282. GWAS-filtered SNVs using PLINK<sup>34</sup> and BOLT-LMM<sup>35</sup> are summarized in Extended Data 2. Data for the gene co-expression networks from 313 explanted human hearts is available at <https://doi.org/10.5281/zenodo.2600420>.

## Code availability

All code for running the lo-siRF analysis and analyzing the experimental results can be found on GitHub (<https://github.com/Yu-Group/epistasis-cardiac-hypertrophy>). This lo-siRF analysis was conducted using R version 3.6.1, Python 3.6.1, and iRF2.0 (<https://github.com/karlkumbier/iRF2.0>). The LVMi derivation from cardiac MRI images and corresponding deep learning model have been published elsewhere<sup>25</sup> ([https://github.com/baiwenjia/ukbb\\_cardiac](https://github.com/baiwenjia/ukbb_cardiac)). PLINK<sup>34</sup> (<https://www.cog-genomics.org/plink/>) and BOLT-LMM<sup>35</sup> ([https://alkesgroup.broadinstitute.org/BOLT-LMM/BOLT-LMM\\_manual.html](https://alkesgroup.broadinstitute.org/BOLT-LMM/BOLT-LMM_manual.html)) were used to perform the GWAS dimension reduction. ANNOVAR<sup>78</sup> (<https://annovar.openbioinformatics.org/en/latest/>) was used to map each SNV to a genetic locus within lo-siRF. FUMA GWAS<sup>37</sup> (<https://fuma.ctglab.nl/>) version 1.5.4 was used to functionally annotate SNVs and map to genes.

## Acknowledgements

The authors would like to acknowledge Dr. David Amar, Dr. Srigoikul Upadhyayula, Dr. Haiyan Huang, and Dr. Ziad Obermeyer for their critical comments and discussions on this work, Stanford nanofabrication facility and Elmer Enriquez for the technical support of microfluidic device fabrication, and Dr. Anna Shcherbina and Dr. Manuel Rivas for their technical help with the UK Biobank data. This work was supported by the Chan Zuckerberg Biohub – San Francisco through the Intercampus Research Awards (2019 - 2022) to R.A., J.R.P., J.B.B., A.J.B., E.A.A., and B.Y. E.A.A. received funding from National Institutes of Health (NIH) through grant number 1R01HL144843. B.Y. received support from National Science Foundation (NSF) through grants DMS-1613002 and IIS 1741340, an NIH grant

R01GM152718, and a Weill Neurohub grant. V.N.P. received funding from K08HL143185. T.M.T. was supported by the National Science Foundation (NSF) Graduate Research Fellowship Program DGE-2146752. Q.W. received funding from American Heart Association Postdoctoral Fellowship through grant number 23POST1023278. C.S.W. received support from NIH through grants F32HL160067 and L30HL159413.

### **Author Information**

These authors contributed equally: Qianru Wang and Tiffany M. Tang

Equal senior authors: Bin Yu and Euan A. Ashley

### **Authors and Affiliations**

*Department of Medicine, Division of Cardiovascular Medicine, Stanford University, Stanford, CA, USA*

Qianru Wang, Nathan Youlton, Chad S. Weldy, J. Weston Hughes, Elizabeth T. Chin, Shirley C. Sutton, James R. Priest, Victoria N. Parikh, and Euan A. Ashley

*Department of Statistics, University of California, Berkeley, Berkeley, CA, USA*

Tiffany M. Tang, Ana M. Kenney, Omer Ronen, Abhineet Agarwal, Xiao Li, James B. Brown, and Bin Yu

*Faculty of Informatics and Data Science, University of Regensburg, Regensburg, Germany*

Merle Behr

*Department of Pharmaceutical Chemistry, University of California, San Francisco, San Francisco, CA, USA*

Karl Kumbier

*Department of Cardiovascular and Metabolic Sciences, Lerner Research Institute, Cleveland Clinic, Cleveland, OH, USA*

Christine S. Moravec and W. H. Wilson Tang

*Department of Cardiovascular Medicine, Heart Vascular and Thoracic Institute, Cleveland Clinic,  
Cleveland, OH, USA*

W. H. Wilson Tang

*Division of Cardiovascular Medicine, Perelman School of Medicine, University of Pennsylvania,  
Philadelphia, PA, USA*

Kenneth B. Margulies and Thomas P. Cappola

*Hospital of The University of Pennsylvania, Philadelphia, PA, USA*

Kenneth B. Margulies and Thomas P. Cappola

*Bakar Computational Health Sciences Institute, University of California, San Francisco, San Francisco,  
CA, USA*

Atul J. Butte and Rima Arnaout

*Chan Zuckerberg Biohub – San Francisco, San Francisco, CA 94158, USA*

Atul J. Butte, Rima A. Arnaout, James B. Brown, James R. Priest, Bin Yu, and Euan A. Ashley

*Division of Environmental Genomics and Systems Biology, Lawrence Berkeley National Laboratory,  
Berkeley, CA, USA*

James B. Brown

*Tenaya Therapeutics, San Francisco, CA, USA*

James R. Priest

*Department of Electrical Engineering and Computer Science, University of California, Berkeley,  
Berkeley, CA, USA*

Bin Yu

*Center for Computational Biology, University of California, Berkeley, Berkeley, CA, USA*

Bin Yu

## **Current addresses**

*Department of Statistics, University of Michigan, Ann Arbor, MI, USA*

Tiffany M. Tang

*Department of Molecular Cell and Developmental Biology, University of California Santa Cruz, Santa Cruz, CA, USA*

Nathan Youlton

*Department of Statistics, University of California Irvine, Irvine, CA, USA*

Ana M. Kenney

*Department of Biostatistics, Johns Hopkins University, Baltimore, MD, USA*

Elizabeth T. Chin

## **Contributions**

Q.W., T.M.T., C.S.W., J.W.H., A.J.B., R.A., J.B.B., J.R.P., V.N.P., B.Y., and E.A.A. conceived and designed research. J.W.H. performed LVMi extraction from cardiac MRI images. T.M.T., A.A., X.L., M.B., and K.K. performed exploratory data investigations leading to development of lo-siRF. T.M.T., A.A., and B.Y. developed the lo-siRF pipeline; T.M.T. performed the lo-siRF analysis. Q.W. and T.M.T. performed the FUMA SNP2GENE process using lo-siRF-prioritized SNVs and GWAS-filtered SNVs. Q.W. evaluated functional annotation results from FUMA, performed ANNOVAR enrichment test for each lo-siRF loci and functional gene mapping. Q.W. performed integrative biological enrichment analyses and evaluated the co-associations between lo-siRF hypothesized gene-gene interactions and the enriched GOs, pathways, and TFs. E.T.C., C.S.M., W.H.W.T., K.B.M., T.P.C., V.N.P., and E.A.A. contributed to the data collection and construction of WGCNA healthy and heart failure coexpression networks. E.T.C. evaluated connectivity differences of epistatic genes hypothesized by lo-siRF between cardiac co-expression networks of failing and non-failing hearts. Q.W. designed and created microfluidic devices; N.Y., S.C.S. and V.N.P. created gene-silenced hiPSC-CM lines; Q.W. and N.Y. performed the microfluidic single cell imaging experiments. Q.W., O.R., and A.M.K. performed single



cell image analysis and morphological feature extraction. Q.W., T.M.T., A.M.K., O.R., C.S.W., V.N.P., J.W.H., B.Y., and E.A.A. interpreted results of experiments; Q.W., T.M.T., and A.M.K. prepared figures; Q.W., T.M.T., C.S.W. and J.W.H. drafted manuscript; All authors contributed in editing and revising manuscript.

### **Corresponding authors**

Correspondence to Bin Yu ([binyu@berkeley.edu](mailto:binyu@berkeley.edu)) and Euan A. Ashley ([euan@stanford.edu](mailto:euan@stanford.edu)).

### **Competing interests**

E.A.A. is a Founder of Personalis, Deepcell, Svexa, RCD Co, and Parameter Health; Advisor to Oxford Nanopore, SequenceBio, and Pacific Biosciences; and a non-executive director for AstraZeneca.

C.S.W. is a consultant for Tensixteen Bio and Renovacor. V.N.P. is an SAB member for and receives research support from BioMarin, Inc, and is a consultant for Constantiam, Inc. and viz.ai. The remaining authors declare no competing interests.

## Reference

1. Weldy, C. S. & Ashley, E. A. Towards precision medicine in heart failure. *Nat. Rev. Cardiol.* 1–18 (2021).
2. Sharir, T. *et al.* Ventricular systolic assessment in patients with dilated cardiomyopathy by preload-adjusted maximal power. Validation and noninvasive application. *Circulation* **89**, 2045–2053 (1994).
3. Bastos, M. B. *et al.* Invasive left ventricle pressure–volume analysis: overview and practical clinical implications. *Eur. Heart J.* **41**, 1286–1297 (2019).
4. Udelson, J. E., 3rd, R. O. C., Bacharach, S. L., Rumble, T. F. & Bonow, R. O. Beta-adrenergic stimulation with isoproterenol enhances left ventricular diastolic performance in hypertrophic cardiomyopathy despite potentiation of myocardial ischemia. Comparison to rapid atrial pacing. *Circulation* **79**, 371–382 (1988).
5. Burkhoff, D., Mirsky, I. & Suga, H. Assessment of systolic and diastolic ventricular properties via pressure-volume analysis: a guide for clinical, translational, and basic researchers. *American Journal of Physiology-Heart and Circulatory Physiology* **289**, H501–H512 (2005).
6. Marian, A. J. & Braunwald, E. Hypertrophic Cardiomyopathy: Genetics, Pathogenesis, Clinical Manifestations, Diagnosis, and Therapy. *Circ. Res.* **121**, 749–770 (2017).
7. Haider, A. W., Larson, M. G., Benjamin, E. J. & Levy, D. Increased left ventricular mass and hypertrophy are associated with increased risk for sudden death. *J. Am. Coll. Cardiol.* **32**, 1454–1459 (1998).
8. Chrispin, J. *et al.* Association of Electrocardiographic and Imaging Surrogates of Left Ventricular Hypertrophy With Incident Atrial Fibrillation. *Journal of the American College of Cardiology* vol. 63 2007–2013 Preprint at <https://doi.org/10.1016/j.jacc.2014.01.066> (2014).
9. Kawel-Boehm, N. *et al.* Left Ventricular Mass at MRI and Long-term Risk of Cardiovascular Events: The Multi-Ethnic Study of Atherosclerosis (MESA). *Radiology* **293**, 107–114 (2019).
10. Bluemke, D. A. *et al.* The Relationship of Left Ventricular Mass and Geometry to Incident Cardiovascular Events The MESA (Multi-Ethnic Study of Atherosclerosis) Study. *J. Am. Coll. Cardiol.* **52**, 2148–2155 (2008).
11. Pirruccello, J. P. *et al.* Analysis of cardiac magnetic resonance imaging in 36,000 individuals yields genetic insights into dilated cardiomyopathy. *Nat. Commun.* **11**, 2254 (2020).
12. Bai, W. *et al.* A population-based phenome-wide association study of cardiac and aortic structure and function. *Nat. Med.* **26**, 1654–1662 (2020).

13. Meyer, H. V. *et al.* Genetic and functional insights into the fractal structure of the heart. *Nature* **584**, 589–594 (2020).
14. Harper, A. R. *et al.* Common genetic variants and modifiable risk factors underpin hypertrophic cardiomyopathy susceptibility and expressivity. *Nat. Genet.* **53**, 135–142 (2021).
15. O’Sullivan, J. W. *et al.* Polygenic Risk Scores for Cardiovascular Disease: A Scientific Statement From the American Heart Association. *Circulation* **146**, e93–e118 (2022).
16. Guindo-Martínez, M. *et al.* The impact of non-additive genetic associations on age-related complex diseases. *Nat. Commun.* **12**, 2436 (2021).
17. Singhal, P., Verma, S. S. & Ritchie, M. D. Gene Interactions in Human Disease Studies-Evidence Is Mounting. *Annu Rev Biomed Data Sci* **6**, 377–395 (2023).
18. Zeng, L. *et al.* Cis-epistasis at the LPA locus and risk of cardiovascular diseases. *Cardiovasc. Res.* **118**, 1088–1102 (2022).
19. Li, Y. *et al.* Statistical and Functional Studies Identify Epistasis of Cardiovascular Risk Genomic Variants From Genome-Wide Association Studies. *J. Am. Heart Assoc.* **9**, e014146 (2020).
20. Hivert, V. *et al.* Estimation of non-additive genetic variance in human complex traits from a large sample of unrelated individuals. *Am. J. Hum. Genet.* **108**, 786–798 (2021).
21. Mackay, T. F. & Moore, J. H. Why epistasis is important for tackling complex human disease genetics. *Genome Med.* **6**, 124 (2014).
22. Basu, S., Kumbier, K., Brown, J. B. & Yu, B. Iterative random forests to discover predictive and stable high-order interactions. *Proc. Natl. Acad. Sci. U. S. A.* **115**, 1943–1948 (2018).
23. Kumbier, K. *et al.* Signed iterative random forests to identify enhancer-associated transcription factor binding. *arXiv [stat.ML]* (2023).
24. Reimherr, M. & Nicolae, D. L. You’ve gotta be lucky: Coverage and the elusive gene-gene interaction. *Ann. Hum. Genet.* **75**, 105–111 (2011).
25. Murk, W., Bracken, M. B. & DeWan, A. T. Confronting the missing epistasis problem: on the reproducibility of gene-gene interactions. *Hum. Genet.* **134**, 837–849 (2015).
26. Yu, B. & Kumbier, K. Veridical data science. *Proc. Natl. Acad. Sci. U. S. A.* **117**, 3920–3929 (2020).
27. Koch, E. M. & Sunyaev, S. R. Maintenance of Complex Trait Variation: Classic Theory and Modern Data. *Front. Genet.* **12**, 763363 (2021).
28. Bai, W. *et al.* Automated cardiovascular magnetic resonance image analysis with fully

- convolutional networks. *J. Cardiovasc. Magn. Reson.* **20**, 65 (2018).
29. Wang, Q., Jones, A.-A. D., 3rd, Gralnick, J. A., Lin, L. & Buie, C. R. Microfluidic dielectrophoresis illuminates the relationship between microbial cell envelope polarizability and electrochemical activity. *Sci Adv* **5**, eaat5664 (2019).
  30. Di Carlo, D. Inertial microfluidics. *Lab Chip* **9**, 3038–3046 (2009).
  31. Guan, G. *et al.* Spiral microchannel with rectangular and trapezoidal cross-sections for size based particle separation. *Sci. Rep.* **3**, 1475 (2013).
  32. Wu, P.-H. *et al.* Single-cell morphology encodes metastatic potential. *Sci Adv* **6**, eaaw6938 (2020).
  33. Dainis, A. *et al.* Silencing of MYH7 ameliorates disease phenotypes in human iPSC-cardiomyocytes. *Physiol. Genomics* **52**, 293–303 (2020).
  34. Littlejohns, T. J. *et al.* The UK Biobank imaging enhancement of 100,000 participants: rationale, data collection, management and future directions. *Nat. Commun.* **11**, 2624 (2020).
  35. Grothues, F. *et al.* Comparison of interstudy reproducibility of cardiovascular magnetic resonance with two-dimensional echocardiography in normal subjects and in patients with heart failure or left ventricular hypertrophy. *Am. J. Cardiol.* **90**, 29–34 (2002).
  36. Du Bois, D. & Du Bois, E. F. Clinical calorimetry: tenth paper a formula to estimate the approximate surface area if height and weight be known. *JAMA Intern. Med.* **17**, 863–871 (1916).
  37. Purcell, S. *et al.* PLINK: a tool set for whole-genome association and population-based linkage analyses. *Am J Hum Genet.* **81**, 559–575 (2007).
  38. Loh, P.-R. *et al.* Efficient Bayesian mixed-model analysis increases association power in large cohorts. *Nat. Genet.* **47**, 284–290 (2015).
  39. Cordell, H. J. Detecting gene-gene interactions that underlie human diseases. *Nat. Rev. Genet.* **10**, 392–404 (2009).
  40. Zhu, S. & Fang, G. MatrixEpistasis: ultrafast, exhaustive epistasis scan for quantitative traits with covariate adjustment. *Bioinformatics* **34**, 2341–2348 (2018).
  41. Crawford, L., Zeng, P., Mukherjee, S. & Zhou, X. Detecting epistasis with the marginal epistasis test in genetic mapping studies of quantitative traits. *PLoS Genet.* **13**, e1006869 (2017).
  42. McInnes, G. *et al.* Global Biobank Engine: enabling genotype-phenotype browsing for biobank summary statistics. *Bioinformatics* **35**, 2495–2497 (2019).
  43. Yildiz, M. *et al.* Left ventricular hypertrophy and hypertension. *Prog. Cardiovasc. Dis.* **63**, 10–21

(2020).

44. Watanabe, K., Taskesen, E., van Bochoven, A. & Posthuma, D. Functional mapping and annotation of genetic associations with FUMA. *Nat. Commun.* **8**, 1826 (2017).
45. Roadmap Epigenomics Consortium *et al.* Integrative analysis of 111 reference human epigenomes. *Nature* **518**, 317–330 (2015).
46. Boyle, A. P. *et al.* Annotation of functional variation in personal genomes using RegulomeDB. *Genome Res.* **22**, 1790–1797 (2012).
47. Kircher, M. *et al.* A general framework for estimating the relative pathogenicity of human genetic variants. *Nat. Genet.* **46**, 310–315 (2014).
48. GTEx Consortium. The Genotype-Tissue Expression (GTEx) project. *Nat. Genet.* **45**, 580–585 (2013).
49. Khurshid, S. *et al.* Clinical and genetic associations of deep learning-derived cardiac magnetic resonance-based left ventricular mass. *Nat. Commun.* **14**, 1558 (2023).
50. Aung, N. *et al.* Genome-Wide Analysis of Left Ventricular Image-Derived Phenotypes Identifies Fourteen Loci Associated With Cardiac Morphogenesis and Heart Failure Development. *Circulation* **140**, 1318–1330 (2019).
51. Verweij, N., van de Vegte, Y. J. & van der Harst, P. Genetic study links components of the autonomous nervous system to heart-rate profile during exercise. *Nat. Commun.* **9**, 898 (2018).
52. Thorolfsson, R. B. *et al.* Genetic insight into sick sinus syndrome. *Eur. Heart J.* **42**, 1959–1971 (2021).
53. Lee, S. *et al.* Optimal unified approach for rare-variant association testing with application to small-sample case-control whole-exome sequencing studies. *Am. J. Hum. Genet.* **91**, 224–237 (2012).
54. de Leeuw, C. A., Mooij, J. M., Heskes, T. & Posthuma, D. MAGMA: generalized gene-set analysis of GWAS data. *PLoS Comput. Biol.* **11**, e1004219 (2015).
55. Kuleshov, M. V. *et al.* Enrichr: a comprehensive gene set enrichment analysis web server 2016 update. *Nucleic Acids Res.* **44**, W90–7 (2016).
56. Keenan, A. B. *et al.* ChEA3: transcription factor enrichment analysis by orthogonal omics integration. *Nucleic Acids Res.* **47**, W212–W224 (2019).
57. Evangelista, J. E. *et al.* Enrichr-KG: bridging enrichment analysis across multiple libraries. *Nucleic Acids Res.* **51**, W168–W179 (2023).

58. Li, L. *et al.* Attention-deficit/hyperactivity disorder as a risk factor for cardiovascular diseases: a nationwide population-based cohort study. *World Psychiatry* **21**, 452–459 (2022).
59. Parikh, V. N. *et al.* Regional Variation in RBM20 Causes a Highly Penetrant Arrhythmogenic Cardiomyopathy. *Circ. Heart Fail.* **12**, e005371 (2019).
60. Cordero, P. *et al.* Pathologic gene network rewiring implicates PPP1R3A as a central regulator in pressure overload heart failure. *Nat. Commun.* **10**, 2760 (2019).
61. Hood, K., Kahkeshani, S., Di Carlo, D. & Roper, M. Direct measurement of particle inertial migration in rectangular microchannels. *Lab Chip* **16**, 2840–2850 (2016).
62. Stavrakis, S., Holzner, G., Choo, J. & deMello, A. High-throughput microfluidic imaging flow cytometry. *Curr. Opin. Biotechnol.* **55**, 36–43 (2019).
63. Alizadeh, E., Xu, W., Castle, J., Foss, J. & Prasad, A. TISMorph: A tool to quantify texture, irregularity and spreading of single cells. *PLoS One* **14**, e0217346 (2019).
64. Wu, X. *et al.* A novel statistic for genome-wide interaction analysis. *PLoS Genet.* **6**, e1001131 (2010).
65. Wan, X. *et al.* BOOST: A fast approach to detecting gene-gene interactions in genome-wide case-control studies. *Am. J. Hum. Genet.* **87**, 325–340 (2010).
66. Kam-Thong, T. *et al.* EPIBLASTER-fast exhaustive two-locus epistasis detection strategy using graphical processing units. *Eur. J. Hum. Genet.* **19**, 465–471 (2011).
67. Ueki, M. & Cordell, H. J. Improved statistics for genome-wide interaction analysis. *PLoS genetics* vol. 8 e1002625 (2012).
68. Nelson, D. L., Lehninger, A. L. & Cox, M. M. *Lehninger Principles of Biochemistry*. (Macmillan, 2008).
69. Stephan, J., Stegle, O. & Beyer, A. A random forest approach to capture genetic effects in the presence of population structure. *Nat. Commun.* **6**, 7432 (2015).
70. Li, J., Malley, J. D., Andrew, A. S., Karagas, M. R. & Moore, J. H. Detecting gene-gene interactions using a permutation-based random forest method. *BioData Min.* **9**, 14 (2016).
71. Adams, S. M. *et al.* Genome Wide Epistasis Study of On-Statin Cardiovascular Events with Iterative Feature Reduction and Selection. *J Pers Med* **10**, (2020).
72. Saha, S., Perrin, L., Röder, L., Brun, C. & Spinelli, L. Epi-MEIF: detecting higher order epistatic interactions for complex traits using mixed effect conditional inference forests. *Nucleic Acids Res.* **50**, e114 (2022).

73. Hornung, R. & Boulesteix, A.-L. Interaction forests: Identifying and exploiting interpretable quantitative and qualitative interaction effects. *Comput. Stat. Data Anal.* **171**, 107460 (2022).
74. Demetci, P. *et al.* Multi-scale inference of genetic trait architecture using biologically annotated neural networks. *PLoS Genet.* **17**, e1009754 (2021).
75. Jiang, R., Tang, W., Wu, X. & Fu, W. A random forest approach to the detection of epistatic interactions in case-control studies. *BMC Bioinformatics* **10 Suppl 1**, S65 (2009).
76. Singhal, P. *et al.* Evidence of epistasis in regions of long-range linkage disequilibrium across five complex diseases in the UK Biobank and eMERGE datasets. *Am. J. Hum. Genet.* **110**, 575–591 (2023).
77. Bycroft, C. *et al.* The UK Biobank resource with deep phenotyping and genomic data. *Nature* **562**, 203–209 (2018).
78. Morgan, M. D. *et al.* Genome-wide study of hair colour in UK Biobank explains most of the SNP heritability. *Nat. Commun.* **9**, 5271 (2018).
79. Petersen, S. E. *et al.* Reference ranges for cardiac structure and function using cardiovascular magnetic resonance (CMR) in Caucasians from the UK Biobank population cohort. *J. Cardiovasc. Magn. Reson.* **19**, 18 (2017).
80. Schaid, D. J., Chen, W. & Larson, N. B. From genome-wide associations to candidate causal variants by statistical fine-mapping. *Nat. Rev. Genet.* **19**, 491–504 (2018).
81. Yoshida, M. & Koike, A. SNPInterForest: a new method for detecting epistatic interactions. *BMC Bioinformatics* **12**, 469 (2011).
82. Chang, C. C. *et al.* Second-generation PLINK: rising to the challenge of larger and richer datasets. *Gigascience* **4**, 7 (2015).
83. Shah, R. D. & Meinshausen, N. Random Intersection Trees. *The Journal of Machine Learning Research* **15**, 629–654 (2014).
84. Tibshirani, R. Regression shrinkage and selection via the lasso. *J. R. Stat. Soc. Series B Stat. Methodol.* **58**, 267–288 (1996).
85. Hoerl, A. E. & Kennard, R. W. Ridge Regression: Biased Estimation for Nonorthogonal Problems. *Technometrics* **12**, 55–67 (1970).
86. Breiman, L. Random Forests. *Mach. Learn.* **45**, 5–32 (2001).
87. Cortes, C. & Vapnik, V. Support-vector networks. *Mach. Learn.* **20**, 273–297 (1995).
88. Pedregosa, F. *et al.* Scikit-learn: Machine Learning in Python. *J. Mach. Learn. Res.* **12**, 2825–

2830 (2011).

89. Erickson, N. *et al.* AutoGluon-tabular: Robust and accurate AutoML for structured data. *arXiv [stat.ML]* (2020).
90. Wang, K., Li, M. & Hakonarson, H. ANNOVAR: functional annotation of genetic variants from high-throughput sequencing data. *Nucleic Acids Res.* **38**, e164 (2010).
91. Chen, C. *et al.* TBtools: An Integrative Toolkit Developed for Interactive Analyses of Big Biological Data. *Mol. Plant* **13**, 1194–1202 (2020).
92. Ashburner, M. *et al.* Gene ontology: tool for the unification of biology. The Gene Ontology Consortium. *Nat. Genet.* **25**, 25–29 (2000).
93. Gene Ontology Consortium *et al.* The Gene Ontology knowledgebase in 2023. *Genetics* **224**, (2023).
94. Smith, C. L. & Eppig, J. T. The mammalian phenotype ontology: enabling robust annotation and comparative analysis. *Wiley Interdiscip. Rev. Syst. Biol. Med.* **1**, 390–399 (2009).
95. Gillespie, M. *et al.* The reactome pathway knowledgebase 2022. *Nucleic Acids Res.* **50**, D687–D692 (2022).
96. Kanehisa, M. & Goto, S. KEGG: kyoto encyclopedia of genes and genomes. *Nucleic Acids Res.* **28**, 27–30 (2000).
97. Davis, C. A. *et al.* The Encyclopedia of DNA elements (ENCODE): data portal update. *Nucleic Acids Res.* **46**, D794–D801 (2018).
98. Chènèby, J., Gheorghe, M., Artufel, M., Mathelier, A. & Ballester, B. ReMap 2018: an updated atlas of regulatory regions from an integrative analysis of DNA-binding ChIP-seq experiments. *Nucleic Acids Res.* **46**, D267–D275 (2018).
99. Lachmann, A. *et al.* Massive mining of publicly available RNA-seq data from human and mouse. *Nat. Commun.* **9**, 1366 (2018).
100. Portales-Casamar, E. *et al.* JASPAR 2010: the greatly expanded open-access database of transcription factor binding profiles. *Nucleic Acids Res.* **38**, D105–10 (2010).
101. Matys, V. *et al.* TRANSFAC and its module TRANSCompel: transcriptional gene regulation in eukaryotes. *Nucleic Acids Res.* **34**, D108–10 (2006).
102. Han, H. *et al.* TRRUST v2: an expanded reference database of human and mouse transcriptional regulatory interactions. *Nucleic Acids Res.* **46**, D380–D386 (2018).
